# Supplementary material for: Novel synthesis of pseudopeptides bearing a difluoromethyl group by Ugi reaction and desulfanylation
Source: publisher site journal article supplement (doi:10.3762/bjoc.7.123), 2011-08-08

**Supporting Information**  
**for**  
**Novel synthesis of pseudopeptides bearing a**  
**difluoromethyl group by Ugi reaction and**  
**desulfanylation**

Jingjing Wu, Hui Li and Song Cao\*

Address: Shanghai Key Laboratory of Chemical Biology, School of Pharmacy, East  
China University of Science and Technology, Shanghai 200237, China

Email: Song Cao\* - scao@ecust.edu.cn

\* Corresponding author

**Experimental procedures and compound characterization**

**Contents**

|                                                             |       |
|-------------------------------------------------------------|-------|
| General .....                                               | S2    |
| Preparation and physical data of compounds <b>1-2</b> ..... | S2    |
| Preparation and physical data of compounds <b>3</b> .....   | S2–5  |
| Preparation and physical data of compounds <b>4</b> .....   | S5–8  |
| Preparation and physical data of compound <b>5</b> ... ..   | S8    |
| Preparation and physical data of compound <b>6</b> ... ..   | S8    |
| References.....                                             | S8    |
| NMR spectra and MS spectra for all products.....            | S9–56 |

## General

All reagents were of analytic grade, obtained from commercial suppliers and used without further purification. Melting points were measured in an open capillary using Büchi melting point B-540 apparatus and are uncorrected.  $^1\text{H}$  NMR and  $^{13}\text{C}$  NMR spectra were recorded on a Bruker AM-400 spectrometer (400 MHz and 100 MHz, respectively) using TMS as internal standard. The  $^{19}\text{F}$  NMR were obtained using a Bruker AM-400 spectrometer (376 MHz) and the  $^{19}\text{F}$  NMR were measured with external  $\text{CF}_3\text{CO}_2\text{H}$  as the standard. Gas chromatography-mass spectra (GC-MS) were recorded on HP 5973 MSD with 6890 GC. High resolution mass spectra (HRMS) were recorded under electron impact conditions using a MicroMass GCT CA 055 instrument and recorded on a MicroMass LCTTM spectrometer. Column chromatography was carried out with Merck 60 (230–400 mesh) silica gel.

### Preparation of ethyl 2,2-difluoro-2-(phenylthio)acetate (**1**)

To a solution of thiophenol (1.10 g, 10 mmol) in DMSO (10 mL) was added NaH (0.26 g, 11 mmol) at rt. After the mixture was stirred for 1 h, ethyl bromodifluoroacetate (2.23 g, 11 mmol) was added to the solution. The mixture was stirred at the same temperature for 19 h (TLC) and quenched with aqueous  $\text{NH}_4\text{Cl}$  solution and extracted with  $\text{CH}_2\text{Cl}_2$ . The organic layer was washed successively with water and brine, dried over anhydrous  $\text{Na}_2\text{SO}_4$ , and evaporated under reduced pressure. The residue was purified by chromatography on a silica gel column to give **1**. Yield: 83%. GC-MS:  $m/z$  = 232, 159, 109, 77.

### Preparation of 2,2-difluoro-2-(phenylthio)acetic acid (**2**)

A solution of **1** (1.66 g, 5 mmol) in THF (15 mL) was mixed with a solution of LiOH (0.36 g, 15 mmol) in  $\text{H}_2\text{O}$  (15 mL). After the mixture was stirred at rt for 1 h (TLC), THF was removed under reduced pressure and the solution was washed with ether ( $3 \times 20$  mL). The solution was adjusted to pH 3.0 with concentrated HCl and was extracted with ether. The combined ether solution was dried over anhydrous  $\text{Na}_2\text{SO}_4$ . The solvent was removed to give **2** without further purification (0.80 g, 93%). Colorless liquid.  $^1\text{H}$  NMR (400 MHz,  $\text{CDCl}_3$ ):  $\delta$  9.96 (s, 1H), 7.67–7.65 (d,  $J$  = 7.7 Hz, 2H), 7.53–7.42 (m, 3H);  $^{13}\text{C}$  NMR (100 MHz,  $\text{CDCl}_3$ ):  $\delta$  166.0 (t,  $^2J_{\text{CF}}$  = 33.6 Hz), 136.8, 131.0, 129.5, 124.2, 119.6 (t,  $^1J_{\text{CF}}$  = 287.3 Hz);  $^{19}\text{F}$  NMR (376.5 MHz,  $\text{CDCl}_3$ ):  $\delta$  -83.6 (s, 2F).

### Preparation of isocyanides

Isocyanides were synthesized according to literature procedures [1].

### General procedure for compounds **3a–m**

To a stirred amine (1 mmol), aldehyde (1 mmol) was added in portions for about 5 min. The mixture was stirred for 30 min again at rt. Then, the reaction mixture was heated to 60 °C, isocyanide (1 mmol) and 2,2-difluoro-2-(phenylthio)acetic acid (**2**) (1 mmol) were added. Stirring was continued at 60 °C for 1 h (TLC). The crude residue was purified by chromatography to give the desired products **3**.

***N*-(2-(benzylamino)-2-oxo-1-phenylethyl)-2,2-difluoro-*N*-phenyl-2-(phenylthio)acetamide (3a):**

White solid. Yield: 82%. Mp: 176.2–177.1 °C, <sup>1</sup>H NMR (400 MHz, CDCl<sub>3</sub>): δ 7.71–7.32 (m, 4H), 7.19–7.14 (m, 12H), 7.1–6.65 (m, 4H), 5.99 (s, 1H), 5.93 (s, 1H), 4.54–4.43 (m, 2H); <sup>13</sup>C NMR (100 MHz, CDCl<sub>3</sub>): δ 168.3, 161.7 (t, <sup>2</sup>J<sub>CF</sub> = 27.2 Hz), 137.8, 137.1, 136.9, 132.8, 131.0, 130.6, 130.0, 129.0, 128.9, 128.6, 128.5, 128.0, 127.9, 127.6, 127.4, 125.7, 123.7 (t, <sup>1</sup>J<sub>CF</sub> = 293.7 Hz), 67.7, 43.8; <sup>19</sup>F NMR (376 MHz, CDCl<sub>3</sub>): δ (–71.3)–(–71.4) (m, 2F).

***N*-(2-(benzylamino)-2-oxo-1-phenylethyl)-2,2-difluoro-2-(phenylthio)-*N*-*o*-tolylacetamide (3b):**

White solid. Yield: 78%. Mp: 132.0–132.9 °C, <sup>1</sup>H NMR (400 MHz, CDCl<sub>3</sub>): δ 7.64–7.29 (m, 8H), 7.27–7.11 (m, 10H), 6.95–6.92 (m, 1H), 5.87 (s, 1H), 5.83 (s, 1H), 4.54–4.52 (m, 2H), 1.90 (s, 3H); <sup>13</sup>C NMR (100 MHz, CDCl<sub>3</sub>): δ 168.4, 162.2 (t, <sup>2</sup>J<sub>CF</sub> = 27.1 Hz), 138.0, 137.9, 137.0, 135.9, 132.0, 131.8, 131.1, 130.1, 130.0, 129.2, 129.1, 128.9, 128.6, 128.3, 127.5, 127.4, 125.8, 125.7, 123.7 (t, <sup>1</sup>J<sub>CF</sub> = 293.9 Hz), 68.0, 43.8, 18.0; <sup>19</sup>F NMR (376 MHz, CDCl<sub>3</sub>): δ –73.0 (d, J<sub>FF</sub> = 220.8 Hz, 1F), –74.2 (d, J<sub>FF</sub> = 220.8 Hz, 1F).

***N*-(2-(benzylamino)-2-oxo-1-*p*-tolylethyl)-2,2-difluoro-2-(phenylthio)-*N*-*o*-tolylacetamide (3c):**

White solid. Yield: 75%. Mp: 156.1–157.5 °C, <sup>1</sup>H NMR (400 MHz, CDCl<sub>3</sub>): δ 7.64–6.95 (m, 18H), 5.86 (t, J = 3.9 Hz, 1H), 5.76 (s, 1H), 4.57–4.47 (m, 2H), 2.29 (s, 3H), 1.92 (s, 3H); <sup>13</sup>C NMR (100 MHz, CDCl<sub>3</sub>): δ 168.7, 162.1 (t, <sup>2</sup>J<sub>CF</sub> = 27.1 Hz), 139.1, 138.1, 137.0, 136.0, 131.8, 131.0, 130.7, 130.2, 130.0, 129.8, 129.0, 128.9, 128.6, 127.6, 127.5, 126.4, 125.9, 125.7, 124.0 (t, <sup>1</sup>J<sub>CF</sub> = 294.1 Hz), 67.8, 43.8, 21.2, 18.1; <sup>19</sup>F NMR (376 MHz, CDCl<sub>3</sub>): δ –72.9 (d, J<sub>FF</sub> = 220.7 Hz, 1F), –74.2 (d, J<sub>FF</sub> = 220.7 Hz, 1F).

***N*-(2-(benzylamino)-2-oxo-1-phenylethyl)-2,2-difluoro-*N*-(4-methoxyphenyl)-2-(phenylthio)acetamide (3d):**

White solid. Yield: 79%. Mp: 142.2–145.0 °C, <sup>1</sup>H NMR (400 MHz, CDCl<sub>3</sub>): δ 7.73–7.29 (m, 9H), 7.27–6.70 (m, 10H), 6.00 (t, J = 5.4 Hz, 1H), 5.94 (s, 1H), 4.57–4.47 (m, 2H), 3.75 (s, 3H); <sup>13</sup>C NMR (100 MHz, CDCl<sub>3</sub>): δ 168.6, 161.7 (t, <sup>2</sup>J<sub>CF</sub> = 27.4 Hz), 160.0, 138.0, 137.1, 137.0, 132.1, 131.2, 130.0, 129.0, 128.7, 128.5, 128.0, 127.6, 127.4, 125.8, 124.8, 123.8 (t, <sup>1</sup>J<sub>CF</sub> = 293.6 Hz), 113.9, 67.1, 55.2, 43.8; <sup>19</sup>F NMR (376 MHz, CDCl<sub>3</sub>): δ –70.9 (d, J<sub>FF</sub> = 220.8 Hz, 1F), –71.5 (d, J<sub>FF</sub> = 220.9 Hz, 1F).

***N*-(2-(benzylamino)-1-(4-methoxyphenyl)-2-oxoethyl)-2,2-difluoro-*N*-phenyl-2-(phenylthio)acetamide (3e):**

White solid. Yield: 78%. Mp: 140.3–142.9 °C, <sup>1</sup>H NMR (400 MHz, CDCl<sub>3</sub>): δ 7.67–7.30 (m, 8H), 7.27–6.51 (m, 11H), 5.97 (s, 1H), 5.95 (s, 1H), 4.57–4.47 (m, 2H), 3.73 (s, 3H); <sup>13</sup>C NMR (100 MHz, CDCl<sub>3</sub>): δ 168.3, 162.1 (t, <sup>2</sup>J<sub>CF</sub> = 27.2 Hz), 159.4, 137.8, 136.9, 133.0, 132.1, 130.7, 130.0, 129.6, 129.0, 128.9, 128.7, 128.6, 127.6, 127.5, 125.9, 123.8 (t, <sup>1</sup>J<sub>CF</sub> = 293.8 Hz), 113.0, 67.5, 55.3, 43.9; <sup>19</sup>F NMR (376 MHz, CDCl<sub>3</sub>): δ –70.9 (d, J<sub>FF</sub> = 221.0 Hz, 1F), –71.6 (d, J<sub>FF</sub> = 221.0 Hz, 1F).

***N*-(2-(benzylamino)-1-(4-methoxyphenyl)-2-oxoethyl)-2,2-difluoro-2-(phenylthio)-*N*-*o*-tolylacetamide (3f):**

White solid. Yield: 74%. Mp: 154.0–155.1 °C, <sup>1</sup>H NMR (400 MHz, CDCl<sub>3</sub>): δ 7.64–7.30 (m, 8H), 7.26–6.68 (m, 10H), 5.90 (t, J = 4.5 Hz, 1H), 5.82 (s, 1H), 4.53–4.51 (m, 2H), 3.75 (s, 3H), 1.89 (s, 3H); <sup>13</sup>C NMR (100 MHz, CDCl<sub>3</sub>): δ 168.7, 162.1 (t, <sup>2</sup>J<sub>CF</sub> = 27.1 Hz), 160.1, 138.1, 138.0, 137.0,

135.8, 132.4, 131.8, 130.2, 130.0, 129.1, 128.9, 128.6, 127.5, 127.4, 125.8, 125.7, 123.9 (t,  $^1J_{\text{CF}} = 294.1$  Hz), 114.3, 113.6, 67.2, 55.2, 43.8, 18.1;  $^{19}\text{F}$  NMR (376 MHz,  $\text{CDCl}_3$ ):  $\delta$  -73.0 (d,  $J_{\text{FF}} = 220.6$  Hz, 1F), -74.2 (d,  $J_{\text{FF}} = 220.6$  Hz, 1F).

***N*-(2-(benzylamino)-1-(4-methoxyphenyl)-2-oxoethyl)-2,2-difluoro-2-(phenylthio)-*N*-*p*-tolylacetamide (3g):**

White solid. Yield: 72%. Mp: 147.1–147.7 °C,  $^1\text{H}$  NMR (400 MHz,  $\text{CDCl}_3$ ):  $\delta$  7.54–7.30 (m, 8H), 7.27–6.56 (m, 10H), 6.02 (s, 1H), 5.91 (s, 1H), 4.56–4.46 (m, 2H), 3.76 (s, 3H), 2.27 (s, 3H);  $^{13}\text{C}$  NMR (100 MHz,  $\text{CDCl}_3$ ):  $\delta$  168.7, 161.8 (t,  $^2J_{\text{CF}} = 27.2$  Hz), 159.9, 138.4, 138.1, 136.9, 134.5, 132.1, 130.8, 130.0, 128.9, 128.6, 128.7, 127.6, 127.4, 125.9, 125.0, 124.0 (t,  $^1J_{\text{CF}} = 293.7$  Hz), 113.9, 67.1, 55.2, 43.8, 21.2;  $^{19}\text{F}$  NMR (376 MHz,  $\text{CDCl}_3$ ):  $\delta$  -70.7 (d,  $J_{\text{FF}} = 220.9$  Hz, 1F), -71.3 (d,  $J_{\text{FF}} = 221.0$  Hz, 1F).

***N*-(2-(benzylamino)-1-(4-methoxyphenyl)-2-oxoethyl)-2,2-difluoro-*N*-(4-fluorophenyl)-2-(phenylthio)acetamide (3h):**

White solid. Yield: 70%. Mp: 162.3–163.2 °C,  $^1\text{H}$  NMR (400 MHz,  $\text{CDCl}_3$ ):  $\delta$  7.80–7.22 (m, 11H), 7.02–6.54 (m, 7H), 6.00 (s, 1H), 5.98 (t,  $J = 5.6$  Hz, 1H), 4.56–4.45 (m, 2H), 3.76 (s, 3H);  $^{13}\text{C}$  NMR (100 MHz,  $\text{CDCl}_3$ ):  $\delta$  168.8, 162.2 (d,  $^1J_{\text{CF}} = 249.0$  Hz), 161.8 (t,  $^2J_{\text{CF}} = 27.2$  Hz), 160.1, 138.0, 136.9, 133.5, 133.1, 132.7, 132.1, 130.1, 129.0, 128.7, 127.5, 127.4, 125.6, 124.5, 123.8 (t,  $^1J_{\text{CF}} = 293.7$  Hz), 114.6 (d,  $^2J_{\text{CF}} = 23.7$  Hz), 114.0, 66.4, 55.2, 43.8;  $^{19}\text{F}$  NMR (376 MHz,  $\text{CDCl}_3$ ):  $\delta$  -71.4 (s, 2F), (-112.3)–(-112.4) (m, 1F).

***N*-(2-(benzylamino)-1-(4-fluorophenyl)-2-oxoethyl)-2,2-difluoro-*N*-phenyl-2-(phenylthio)acetamide (3i):**

White solid. Yield: 77%. Mp: 184.9–186.0 °C,  $^1\text{H}$  NMR (400 MHz,  $\text{CDCl}_3$ ):  $\delta$  7.71–7.31 (m, 9H), 7.27–6.62 (m, 10H), 6.03 (s, 1H), 5.96 (s, 1H), 4.59–4.45 (m, 2H);  $^{13}\text{C}$  NMR (100 MHz,  $\text{CDCl}_3$ ):  $\delta$  168.3, 162.9 (d,  $^1J_{\text{CF}} = 249.3$  Hz), 161.9 (t,  $^2J_{\text{CF}} = 28.1$  Hz), 137.8, 136.9, 136.7, 132.7, 132.6, 131.1, 130.1, 129.0, 128.7, 128.2, 127.9, 127.6, 127.5, 125.6, 123.7 (t,  $^1J_{\text{CF}} = 293.8$  Hz), 115.5 (d,  $^2J_{\text{CF}} = 21.6$  Hz), 66.5, 43.8;  $^{19}\text{F}$  NMR (376 MHz,  $\text{CDCl}_3$ ):  $\delta$  -71.4 (s, 2F), -111.7 (s, 1F).

***N*-(2-(benzylamino)-1-(4-fluorophenyl)-2-oxoethyl)-2,2-difluoro-2-(phenylthio)-*N*-*o*-tolylacetamide (3j):**

White solid. Yield: 70%. Mp: 162.3–163.2 °C,  $^1\text{H}$  NMR (400 MHz,  $\text{CDCl}_3$ ):  $\delta$  7.64–7.31 (m, 9H), 7.24–6.83 (m, 9H), 5.97 (s, 1H), 5.87 (s, 1H), 4.56–4.50 (m, 2H), 1.86 (s, 3H);  $^{13}\text{C}$  NMR (100 MHz,  $\text{CDCl}_3$ ):  $\delta$  168.3, 163.1 (d,  $^1J_{\text{CF}} = 249.6$  Hz), 162.3 (t,  $^2J_{\text{CF}} = 27.5$  Hz), 137.9, 137.8, 137.0, 135.4, 133.0 (d,  $^3J_{\text{CF}} = 8.4$  Hz), 131.8, 130.2, 130.1, 129.3, 128.9, 128.7, 127.5, 127.4, 125.8, 125.6, 123.8 (t,  $^1J_{\text{CF}} = 293.2$  Hz), 116.0, 115.2 (d,  $^2J_{\text{CF}} = 21.5$  Hz), 66.7, 43.9, 18.0;  $^{19}\text{F}$  NMR (376 MHz,  $\text{CDCl}_3$ ):  $\delta$  -73.3 (d,  $J_{\text{FF}} = 220.7$  Hz, 1F), -74.3 (d,  $J_{\text{FF}} = 220.7$  Hz, 1F), -111.5 (s, 1F).

***N*-(2-(benzylamino)-1-(4-fluorophenyl)-2-oxoethyl)-2,2-difluoro-*N*-(4-methoxyphenyl)-2-(phenylthio)acetamide (3k):**

White solid. Yield: 72%. Mp: 154.0–155.1 °C,  $^1\text{H}$  NMR (400 MHz,  $\text{CDCl}_3$ ):  $\delta$  7.63–7.29 (m, 8H), 7.28–6.48 (m, 10H), 6.01 (s, 1H), 5.97 (s, 1H), 4.57–4.47 (m, 2H), 3.75 (s, 3H);  $^{13}\text{C}$  NMR (100 MHz,  $\text{CDCl}_3$ ):  $\delta$  168.4, 162.9 (d,  $^1J_{\text{CF}} = 249.2$  Hz), 162.1 (t,  $^2J_{\text{CF}} = 27.0$  Hz), 159.4, 137.8, 136.9, 132.7 (d,

$^3J_{\text{CF}} = 8.3$  Hz), 132.5, 132.2, 130.1, 129.1, 129.0, 128.7, 127.6, 127.5, 125.7, 123.7 (t,  $^1J_{\text{CF}} = 293.6$  Hz), 115.5 (d,  $^2J_{\text{CF}} = 21.6$  Hz), 113.1, 66.1, 55.3, 43.8;  $^{19}\text{F}$  NMR (376 MHz,  $\text{CDCl}_3$ ):  $\delta$  -71.4 (s, 2F), -111.8 (s, 1F).

**2,2-Difluoro-*N*-(2-oxo-1-phenyl-2-(phenylamino)ethyl)-*N*-phenyl-2-(phenylthio)acetamide (3l):**

White solid. Yield: 68%. Mp: 207.8–208.5 °C,  $^1\text{H}$  NMR (400 MHz,  $\text{CDCl}_3$ ):  $\delta$  7.79–7.31 (m, 13H), 7.27–7.02 (m, 7H), 6.67 (s, 1H), 6.11 (s, 1H);  $^{13}\text{C}$  NMR (100 MHz,  $\text{CDCl}_3$ ):  $\delta$  166.5, 162.0 (t,  $^2J_{\text{CF}} = 27.6$  Hz), 137.4, 136.9, 132.4, 131.1, 130.7, 130.1, 129.2, 129.0, 128.7, 128.6, 128.3, 127.9, 125.6, 124.6, 123.7 (t,  $^1J_{\text{CF}} = 293.7$  Hz), 120.9, 120.1, 68.2;  $^{19}\text{F}$  NMR (376 MHz,  $\text{CDCl}_3$ ):  $\delta$  -71.4 (s, 2F).

**2,2-Difluoro-*N*-(1-(4-methoxyphenyl)-2-oxo-2-(phenylamino)ethyl)-*N*-phenyl-2-(phenylthio)acetamide (3m):**

White solid. Yield: 66%. Mp: 195.2–196.0 °C,  $^1\text{H}$  NMR (400 MHz,  $\text{CDCl}_3$ ):  $\delta$  7.79–6.74 (m, 19H), 6.65 (s, 1H), 6.11 (s, 1H), 3.77 (s, 3H);  $^{13}\text{C}$  NMR (100 MHz,  $\text{CDCl}_3$ ):  $\delta$  166.9, 161.9 (t,  $^2J_{\text{CF}} = 27.4$  Hz), 160.1, 137.5, 136.9, 136.8, 132.2, 131.2, 130.1, 128.9, 128.6, 128.2, 127.8, 125.7, 124.5, 124.3, 123.8 (t,  $^1J_{\text{CF}} = 293.7$  Hz), 120.1, 114.0, 67.5, 55.3;  $^{19}\text{F}$  NMR (376 MHz,  $\text{CDCl}_3$ ):  $\delta$  -71.3 (s, 2F).

## General procedure for Compounds 4a–m

To a solution of **3** (1 mmol) in dry toluene (3 mL) was added  $\text{Bu}_3\text{SnH}$  (0.58 g, 2 mmol) under an argon atmosphere. Deoxygenation was continued for 5 min. Azobisisobutyronitrile (AIBN) (0.02 g, 0.1 mmol) was added and the solution was heated at reflux for 9 h (TLC). The mixture was concentrated under reduced pressure and the residue was dissolved in EtOAc (5 mL). The solution was stirred with  $\text{KF}/\text{H}_2\text{O}$  (15 mg/0.15 mL) for 3 h and extracted with EtOAc (3  $\times$  20 mL). The organic phase was washed successively with water (20 mL) and brine (20 mL), dried over anhydrous  $\text{Na}_2\text{SO}_4$ . After solvent removal, the crude product was purified by chromatography to give desired products **4**.

***N*-(2-(benzylamino)-2-oxo-1-phenylethyl)-2,2-difluoro-*N*-phenylacetamide (4a):**

White solid. Yield: 75%. Mp: 187.0–187.8 °C,  $^1\text{H}$  NMR (400 MHz,  $\text{CDCl}_3$ ):  $\delta$  7.76–7.30 (m, 5H), 7.27–6.68 (m, 10H), 6.06 (s, 1H), 5.94 (t,  $J = 3.9$  Hz, 1H), 5.74 (t,  $J_{\text{HF}} = 53.4$  Hz, 1H), 4.59–4.47 (m, 2H);  $^{13}\text{C}$  NMR (100 MHz,  $\text{CDCl}_3$ ):  $\delta$  168.4, 162.3 (t,  $^2J_{\text{CF}} = 27.4$  Hz), 137.7, 136.4, 132.8, 130.8, 130.5, 129.2, 129.1, 128.7, 128.6, 127.6, 127.5, 105.9 (t,  $^1J_{\text{CF}} = 246.1$  Hz), 65.8, 43.9;  $^{19}\text{F}$  NMR (376 MHz,  $\text{CDCl}_3$ ):  $\delta$  -122.9 (dd,  $J_{\text{HF}} = 53.3$  Hz,  $J_{\text{FF}} = 320.2$  Hz, 1F), -124.1 (dd,  $J_{\text{HF}} = 53.6$  Hz,  $J_{\text{FF}} = 320.2$  Hz, 1F); HRMS–ESI:  $[\text{M} + \text{Na}]^+$  calcd for  $\text{C}_{23}\text{H}_{20}\text{F}_2\text{N}_2\text{O}_2\text{Na}$ , 417.1391; found, 417.1389.

***N*-(2-(benzylamino)-2-oxo-1-phenylethyl)-2,2-difluoro-*N*-*o*-tolylacetamide (4b):**

White solid. Yield: 75%. Mp: 187.0–187.8 °C,  $^1\text{H}$  NMR (400 MHz,  $\text{CDCl}_3$ ):  $\delta$  7.71–7.29 (m, 4H), 7.27–7.02 (m, 10H), 5.96 (s, 1H), 5.95 (s, 1H), 5.67 (t,  $J_{\text{HF}} = 53.6$  Hz, 1H), 4.56–4.45 (m, 2H), 1.83 (s, 3H);  $^{13}\text{C}$  NMR (100 MHz,  $\text{CDCl}_3$ ):  $\delta$  168.5, 162.6 (t,  $^2J_{\text{CF}} = 26.7$  Hz), 138.1, 135.1, 131.9, 131.4, 130.9, 130.2, 129.8, 129.3, 128.7, 128.4, 127.5, 127.4, 127.0, 105.8 (t,  $^1J_{\text{CF}} = 247.5$  Hz), 66.1, 43.9, 17.6;  $^{19}\text{F}$  NMR (376 MHz,  $\text{CDCl}_3$ ):  $\delta$  -123.8 (dd,  $J_{\text{HF}} = 33.0$  Hz,  $J_{\text{FF}} = 301.3$  Hz, 1F), -124.8 (dd,  $J_{\text{HF}} = 33.5$  Hz,  $J_{\text{FF}} = 301.2$  Hz, 1F); HRMS–ESI:  $[\text{M} - \text{H}]^+$  calcd for  $\text{C}_{24}\text{H}_{21}\text{F}_2\text{N}_2\text{O}_2$ , 407.1571; found, 407.1569.

***N*-(2-(benzylamino)-2-oxo-1-*p*-tolylethyl)-2,2-difluoro-*N*-*o*-tolylacetamide (4c):**

White solid. Yield: 74%. Mp: 179.6–180.5 °C, <sup>1</sup>H NMR (400 MHz, CDCl<sub>3</sub>): δ 7.69–7.29 (m, 4H), 7.26–6.97 (m, 9H), 5.92 (s, 1H), 5.91 (s, 1H), 5.66 (t, *J*<sub>HF</sub> = 53.6 Hz, 1H), 4.56–4.44 (m, 2H), 2.28 (s, 3H), 1.85 (s, 3H); <sup>13</sup>C NMR (100 MHz, CDCl<sub>3</sub>): δ 168.7, 162.5 (t, <sup>2</sup>*J*<sub>CF</sub> = 26.6 Hz), 139.2, 138.1, 137.9, 135.3, 131.4, 131.0, 130.7, 130.3, 129.7, 129.1, 128.6, 127.5, 127.4, 126.9, 105.8 (t, <sup>1</sup>*J*<sub>CF</sub> = 248.1 Hz), 65.9, 43.8, 21.2, 17.7; <sup>19</sup>F NMR (376 MHz, CDCl<sub>3</sub>): δ –123.8 (dd, *J*<sub>HF</sub> = 35.0 Hz, *J*<sub>FF</sub> = 302.5 Hz, 1F), –124.8 (dd, *J*<sub>HF</sub> = 34.6 Hz, *J*<sub>FF</sub> = 302.5 Hz, 1F); HRMS–ESI: [M + Na]<sup>+</sup> calcd for C<sub>25</sub>H<sub>24</sub>F<sub>2</sub>N<sub>2</sub>O<sub>2</sub>Na, 445.1704; found, 445.1701.

***N*-(2-(benzylamino)-2-oxo-1-phenylethyl)-2,2-difluoro-*N*-(4-methoxyphenyl)acetamide (4d):**

White solid. Yield: 75%. Mp: 187.0–187.8 °C, <sup>1</sup>H NMR (400 MHz, CDCl<sub>3</sub>): δ 7.34–7.23 (m, 9H), 7.06–6.70 (m, 5H), 6.03 (s, 1H), 5.94 (s, 1H), 5.72 (t, *J*<sub>HF</sub> = 53.4 Hz, 1H), 4.57–4.46 (m, 2H), 3.76 (s, 3H); <sup>13</sup>C NMR (100 MHz, CDCl<sub>3</sub>): δ 168.6, 162.2 (t, <sup>2</sup>*J*<sub>CF</sub> = 26.7 Hz), 160.0, 137.7, 136.4, 131.9, 130.8, 129.2, 129.1, 128.7, 127.6, 127.5, 124.7, 114.0, 105.9 (t, <sup>1</sup>*J*<sub>CF</sub> = 245.9 Hz), 65.2, 55.2, 43.9; <sup>19</sup>F NMR (376 MHz, CDCl<sub>3</sub>): δ –122.9 (dd, *J*<sub>HF</sub> = 53.3 Hz, *J*<sub>FF</sub> = 320.1 Hz, 1F), –124.1 (dd, *J*<sub>HF</sub> = 53.7 Hz, *J*<sub>FF</sub> = 320.1 Hz, 1F); HRMS–ESI: [M - H]<sup>+</sup> calcd for C<sub>24</sub>H<sub>21</sub>F<sub>2</sub>N<sub>2</sub>O<sub>3</sub>, 423.1520; found, 423.1517.

***N*-(2-(benzylamino)-1-(4-methoxyphenyl)-2-oxoethyl)-2,2-difluoro-*N*-phenylacetamide (4e):**

White solid. Yield: 70%. Mp: 193.6–194.7 °C, <sup>1</sup>H NMR (400 MHz, CDCl<sub>3</sub>): δ 7.68–7.30 (m, 3H), 7.28–6.49 (m, 11H), 6.08 (s, 1H), 5.93 (t, *J* = 4.4 Hz, 1H), 5.75 (t, *J*<sub>HF</sub> = 53.5 Hz, 1H), 4.57–4.46 (m, 2H), 3.76 (s, 3H); <sup>13</sup>C NMR (100 MHz, CDCl<sub>3</sub>): δ 168.5, 162.6 (t, <sup>2</sup>*J*<sub>CF</sub> = 26.5 Hz), 159.8, 137.8, 132.9, 132.1, 132.0, 130.6, 130.2, 129.0, 128.6, 127.6, 127.5, 114.1, 105.9 (t, <sup>1</sup>*J*<sub>CF</sub> = 245.0 Hz), 65.5, 55.4, 43.8; <sup>19</sup>F NMR (376 MHz, CDCl<sub>3</sub>): δ –123.1 (dd, *J*<sub>HF</sub> = 53.5 Hz, *J*<sub>FF</sub> = 319.5 Hz, 1F), –124.3 (dd, *J*<sub>HF</sub> = 53.5 Hz, *J*<sub>FF</sub> = 319.8 Hz, 1F); HRMS–ESI: [M + Na]<sup>+</sup> calcd for C<sub>24</sub>H<sub>22</sub>F<sub>2</sub>N<sub>2</sub>O<sub>3</sub>Na, 447.1496; found, 447.1497.

***N*-(2-(benzylamino)-1-(4-methoxyphenyl)-2-oxoethyl)-2,2-difluoro-*N*-*o*-tolylacetamide (4f):**

White solid. Yield: 67%. Mp: 139.5–141.0 °C, <sup>1</sup>H NMR (400 MHz, CDCl<sub>3</sub>): δ 7.69–7.30 (m, 5H), 7.26–7.00 (m, 8H), 5.94 (s, 1H), 5.90 (s, 1H), 5.66 (t, *J*<sub>HF</sub> = 53.6 Hz, 1H), 4.56–4.46 (m, 2H), 3.75 (s, 3H), 1.83 (s, 3H); <sup>13</sup>C NMR (100 MHz, CDCl<sub>3</sub>): δ 168.8, 162.5 (t, <sup>2</sup>*J*<sub>CF</sub> = 26.7 Hz), 160.1, 138.1, 137.9, 135.1, 132.2, 131.0, 129.7, 129.1, 128.7, 127.5, 127.4, 126.9, 123.8, 113.7, 105.8 (t, <sup>1</sup>*J*<sub>CF</sub> = 246.1 Hz), 65.3, 55.2, 43.8, 17.7; <sup>19</sup>F NMR (376 MHz, CDCl<sub>3</sub>): δ –123.8 (dd, *J*<sub>HF</sub> = 31.8 Hz, *J*<sub>FF</sub> = 299.7 Hz, 1F), –124.8 (dd, *J*<sub>HF</sub> = 31.4 Hz, *J*<sub>FF</sub> = 299.7 Hz, 1F); HRMS–ESI: [M + Na]<sup>+</sup> calcd for C<sub>25</sub>H<sub>24</sub>F<sub>2</sub>N<sub>2</sub>O<sub>3</sub>Na, 461.1653; found, 461.1656.

***N*-(2-(benzylamino)-1-(4-methoxyphenyl)-2-oxoethyl)-2,2-difluoro-*N*-*p*-tolylacetamide (4g):**

White solid. Yield: 78%. Mp: 169.4–170.5 °C, <sup>1</sup>H NMR (400 MHz, CDCl<sub>3</sub>): δ 7.54–7.30 (m, 3H), 7.26–6.52 (m, 10H), 6.01 (s, 1H), 5.93 (s, 1H), 5.72 (t, *J*<sub>HF</sub> = 53.5 Hz, 1H), 4.56–4.45 (m, 2H), 3.77 (s, 3H), 2.32 (s, 3H); <sup>13</sup>C NMR (100 MHz, CDCl<sub>3</sub>): δ 168.8, 162.3 (t, <sup>2</sup>*J*<sub>CF</sub> = 26.5 Hz), 159.9, 139.2, 137.9, 133.7, 131.9, 130.5, 129.7, 128.6, 127.6, 127.4, 124.9, 113.9, 105.8 (t, <sup>1</sup>*J*<sub>CF</sub> = 245.5 Hz), 65.0, 55.2, 43.8, 21.1; <sup>19</sup>F NMR (376 MHz, CDCl<sub>3</sub>): δ –123.1 (dd, *J*<sub>HF</sub> = 53.5 Hz, *J*<sub>FF</sub> = 319.9 Hz, 1F), –124.2 (dd, *J*<sub>HF</sub> = 53.4 Hz, *J*<sub>FF</sub> = 320.0 Hz, 1F); HRMS–ESI: [M + Na]<sup>+</sup> calcd for C<sub>25</sub>H<sub>24</sub>F<sub>2</sub>N<sub>2</sub>O<sub>3</sub>Na, 461.1653; found, 461.1654.

***N*-(2-(benzylamino)-1-(4-methoxyphenyl)-2-oxoethyl)-2,2-difluoro-*N*-(4-fluorophenyl)acetamide (4h):**

White solid. Yield: 71%. Mp: 155.3–156.1 °C, <sup>1</sup>H NMR (400 MHz, CDCl<sub>3</sub>): δ 7.82–7.31 (m, 4H), 7.27–6.54 (m, 9H), 6.06 (s, 1H), 5.88 (s, 1H), 5.74 (t, *J*<sub>HF</sub> = 53.4 Hz, 1H), 4.57–4.45 (m, 2H), 3.77 (s, 3H); <sup>13</sup>C NMR (100 MHz, CDCl<sub>3</sub>): δ 168.7, 162.5 (d, <sup>1</sup>*J*<sub>CF</sub> = 250.4 Hz), 162.2 (t, <sup>2</sup>*J*<sub>CF</sub> = 26.6 Hz), 160.1, 137.7, 133.0, 132.1 (d, <sup>3</sup>*J*<sub>CF</sub> = 3.1 Hz), 131.9, 128.7, 127.6, 127.5, 124.4, 116.0 (d, <sup>2</sup>*J*<sub>CF</sub> = 24.2 Hz), 114.1, 106.1 (t, <sup>1</sup>*J*<sub>CF</sub> = 246.7 Hz), 64.7, 55.2, 43.9; <sup>19</sup>F NMR (376 MHz, CDCl<sub>3</sub>): δ (–111.0)–(–111.1) (m, 1F), –122.6 (dd, *J*<sub>HF</sub> = 53.3 Hz, *J*<sub>FF</sub> = 319.9 Hz, 1F), –124.1 (dd, *J*<sub>HF</sub> = 53.5 Hz, *J*<sub>FF</sub> = 319.7 Hz, 1F); HRMS–ESI: [M + Na]<sup>+</sup> calcd for C<sub>24</sub>H<sub>21</sub>F<sub>3</sub>N<sub>2</sub>O<sub>3</sub>Na, 465.1402; found, 465.1402.

***N*-(2-(benzylamino)-1-(4-fluorophenyl)-2-oxoethyl)-2,2-difluoro-*N*-phenylacetamide (4i):**

White solid. Yield: 75%. Mp: 177.2–177.9 °C, <sup>1</sup>H NMR (400 MHz, CDCl<sub>3</sub>): δ 7.34–7.28 (m, 6H), 7.27–6.63 (m, 8H), 6.04 (s, 1H), 6.00 (t, *J* = 5.0 Hz, 1H), 5.71 (t, *J*<sub>HF</sub> = 53.4 Hz, 1H), 4.57–4.45 (m, 2H); <sup>13</sup>C NMR (100 MHz, CDCl<sub>3</sub>): δ 168.3, 163.0 (d, <sup>1</sup>*J*<sub>CF</sub> = 249.5 Hz), 162.3 (t, <sup>2</sup>*J*<sub>CF</sub> = 26.7 Hz), 137.7, 136.0, 132.5 (d, <sup>3</sup>*J*<sub>CF</sub> = 8.4 Hz), 130.8, 129.4, 129.2, 128.7, 128.6, 127.6, 127.5, 115.6 (d, <sup>2</sup>*J*<sub>CF</sub> = 21.6 Hz), 105.8 (t, <sup>1</sup>*J*<sub>CF</sub> = 246.4 Hz), 64.6, 43.9; <sup>19</sup>F NMR (376 MHz, CDCl<sub>3</sub>): δ (–111.5)–(–111.6) (m, 1F), –122.9 (dd, *J*<sub>HF</sub> = 53.3 Hz, *J*<sub>FF</sub> = 320.6 Hz, 1F), –124.2 (dd, *J*<sub>HF</sub> = 53.5 Hz, *J*<sub>FF</sub> = 320.7 Hz, 1F); HRMS–ESI: [M + Na]<sup>+</sup> calcd for C<sub>23</sub>H<sub>19</sub>F<sub>3</sub>N<sub>2</sub>O<sub>2</sub>Na, 435.1296; found, 435.1297.

***N*-(2-(benzylamino)-1-(4-fluorophenyl)-2-oxoethyl)-2,2-difluoro-*N*-*o*-tolylacetamide (4j):**

White solid. Yield: 69%. Mp: 181.9–182.5 °C, <sup>1</sup>H NMR (400 MHz, CDCl<sub>3</sub>): δ 7.69–7.30 (m, 3H), 7.26–6.83 (m, 10H), 6.10 (s, 1H), 5.99 (s, 1H), 5.66 (t, *J*<sub>HF</sub> = 53.5 Hz, 1H), 4.55–4.43 (m, 2H), 1.81 (s, 3H); <sup>13</sup>C NMR (100 MHz, CDCl<sub>3</sub>): δ 168.5, 163.0 (d, <sup>1</sup>*J*<sub>CF</sub> = 249.9 Hz), 162.6 (t, <sup>2</sup>*J*<sub>CF</sub> = 26.8 Hz), 138.0, 137.8, 134.7, 132.8 (d, <sup>3</sup>*J*<sub>CF</sub> = 8.3 Hz), 131.5, 131.0, 129.9, 129.6, 128.7, 127.6, 127.5, 127.1, 115.3 (d, <sup>2</sup>*J*<sub>CF</sub> = 21.6 Hz), 105.8 (t, <sup>1</sup>*J*<sub>CF</sub> = 247.2 Hz), 65.9, 43.8, 17.7; <sup>19</sup>F NMR (376 MHz, CDCl<sub>3</sub>): δ (–111.3)–(–111.4) (m, 1F), –123.9 (dd, *J*<sub>HF</sub> = 30.5 Hz, *J*<sub>FF</sub> = 298.7 Hz, 1F), –124.8 (dd, *J*<sub>HF</sub> = 30.1 Hz, *J*<sub>FF</sub> = 298.6 Hz, 1F); HR-MS(ESI): [M + Na]<sup>+</sup> calcd for C<sub>24</sub>H<sub>21</sub>F<sub>3</sub>N<sub>2</sub>O<sub>2</sub>Na, 449.1453; found, 449.1453.

***N*-(2-(benzylamino)-1-(4-fluorophenyl)-2-oxoethyl)-2,2-difluoro-*N*-(4-methoxyphenyl)acetamide (4k):**

White solid. Yield: 74%. Mp: 186.2–187.4 °C, <sup>1</sup>H NMR (400 MHz, CDCl<sub>3</sub>): δ 7.64–7.29 (m, 4H), 7.25–6.46 (m, 9H), 6.07 (s, 1H), 5.99 (t, *J* = 4.9 Hz, 1H), 5.74 (t, *J*<sub>HF</sub> = 53.5 Hz, 1H), 4.57–4.46 (m, 2H), 3.79 (s, 3H); <sup>13</sup>C NMR (100 MHz, CDCl<sub>3</sub>): δ 168.6, 162.9 (d, <sup>1</sup>*J*<sub>CF</sub> = 249.3 Hz), 162.6 (t, <sup>2</sup>*J*<sub>CF</sub> = 26.7 Hz), 159.9, 137.8, 132.5 (d, <sup>3</sup>*J*<sub>CF</sub> = 8.3 Hz), 132.1, 128.8 (d, <sup>4</sup>*J*<sub>CF</sub> = 3.3 Hz), 128.7, 128.4, 128.2, 127.5, 127.4, 115.6 (d, <sup>2</sup>*J*<sub>CF</sub> = 21.6 Hz), 114.2, 105.8 (t, <sup>1</sup>*J*<sub>CF</sub> = 245.5 Hz), 64.3, 55.4, 43.8; <sup>19</sup>F NMR (376 MHz, CDCl<sub>3</sub>): δ (–111.5)–(–111.6) (m, 1F), –123.1 (dd, *J*<sub>HF</sub> = 53.3 Hz, *J*<sub>FF</sub> = 320.1 Hz, 1F), –124.4 (dd, *J*<sub>HF</sub> = 53.4 Hz, *J*<sub>FF</sub> = 320.0 Hz, 1F); HRMS–ESI: [M + Na]<sup>+</sup> calcd for C<sub>24</sub>H<sub>21</sub>F<sub>3</sub>N<sub>2</sub>O<sub>3</sub>Na, 465.1402; found, 465.1400.

**2,2-Difluoro-*N*-(2-oxo-1-phenyl-2-(phenylamino)ethyl)-*N*-phenylacetamide (4l):**

White solid. Yield: 74%. Mp: 186.2–187.4 °C, <sup>1</sup>H NMR (400 MHz, CDCl<sub>3</sub>): δ 7.51–7.29 (m, 9H), 7.27–7.10 (m, 6H), 6.34 (s, 1H), 6.26 (s, 1H), 5.76 (t, *J*<sub>HF</sub> = 53.4 Hz, 1H); <sup>13</sup>C NMR (100 MHz, CDCl<sub>3</sub>): δ 166.8, 162.5 (t, <sup>2</sup>*J*<sub>CF</sub> = 26.6 Hz), 137.4, 136.1, 132.3, 130.9, 130.6, 129.3, 129.2, 129.1, 128.9, 128.8, 124.6, 120.1, 105.9 (t, <sup>1</sup>*J*<sub>CF</sub> = 246.0 Hz), 66.2; <sup>19</sup>F NMR (376 MHz, CDCl<sub>3</sub>): δ –122.9 (dd, *J*<sub>HF</sub> = 53.3 Hz, *J*<sub>FF</sub> = 320.4 Hz, 1F), –124.1 (dd, *J*<sub>HF</sub> = 53.5 Hz, *J*<sub>FF</sub> = 320.6 Hz, 1F); HRMS–ESI: [M + Na]<sup>+</sup> calcd for C<sub>22</sub>H<sub>18</sub>F<sub>2</sub>N<sub>2</sub>O<sub>2</sub>Na, 403.1234; found, 403.1233.

**2,2-Difluoro-*N*-(1-(4-methoxyphenyl)-2-oxo-2-(phenylamino)ethyl)-*N*-phenylacetamide (4m):**

White solid. Yield: 74%. Mp: 186.2–187.4 °C, <sup>1</sup>H NMR (400 MHz, CDCl<sub>3</sub>): δ 7.81–7.29 (m, 9H), 7.14–6.76 (m, 5H), 6.61 (s, 1H), 6.22 (s, 1H), 5.75 (t, *J*<sub>HF</sub> = 53.4 Hz, 1H), 3.78 (s, 3H); <sup>13</sup>C NMR (100 MHz, CDCl<sub>3</sub>): δ 166.9, 162.3 (t, <sup>2</sup>*J*<sub>CF</sub> = 25.6 Hz), 160.2, 137.3, 136.1, 132.0, 130.9, 129.3, 129.0, 124.7, 124.2, 120.1, 114.1, 105.9 (t, <sup>1</sup>*J*<sub>CF</sub> = 245.6 Hz), 100.5, 55.3, 18.4; <sup>19</sup>F NMR (376 MHz, CDCl<sub>3</sub>): δ –122.9 (dd, *J*<sub>HF</sub> = 53.4 Hz, *J*<sub>FF</sub> = 320.4 Hz, 1F), –124.1 (dd, *J*<sub>HF</sub> = 53.4 Hz, *J*<sub>FF</sub> = 320.4 Hz, 1F); HRMS–ESI: [M + Na]<sup>+</sup> calcd for C<sub>23</sub>H<sub>20</sub>F<sub>2</sub>N<sub>2</sub>O<sub>3</sub>Na, 433.1340; found, 433.1339.

**Preparation of *N*-benzyl-2-phenyl-2-(*N*-phenylacetamido)acetamide (5)**

To a stirred aniline (0.093 g, 1 mmol), benzaldehyde (0.106 g, 1 mmol) was added in portions for about 5 min. The mixture was stirred for 30 min at rt. Then, the reaction mixture was heated to 60 °C and (isocyanomethyl)benzene (0.117 g, 1 mmol) and acetic acid (0.060 g, 1 mmol) were added. Stirring was continued at 60 °C. After completion of the reaction (monitored by TLC), the crude residue was diluted with CH<sub>2</sub>Cl<sub>2</sub> and purified by chromatography to give the desired product **5**. White solid, yield: 75%. Mp: 152.5–153.4 °C, <sup>1</sup>H NMR (400 MHz, CDCl<sub>3</sub>): δ 7.33–7.14 (m, 15H), 6.15 (s, 1H), 6.09 (s, 1H), 4.55–4.47 (m, 2H), 1.89 (s, 1H); <sup>13</sup>C NMR (100 MHz, CDCl<sub>3</sub>): δ 171.3, 169.9, 140.7, 138.2, 134.6, 130.4, 130.3, 128.9, 128.6, 128.4, 128.3, 128.0, 127.5, 127.3, 65.1, 43.7, 23.3.

**Preparation of *N*-(2-(benzylamino)-2-oxo-1-phenylethyl)-2,2,2-trifluoro-*N*-phenylacetamide (6)**

To a stirred aniline (0.093 g, 1 mmol), benzaldehyde (0.106 g, 1 mmol) was added in portions for about 5 min. The mixture was stirred for 30 min at rt. Then, the reaction mixture was heated to 60 °C and (isocyanomethyl)benzene (0.117 g, 1 mmol) and 2,2,2-trifluoroacetic acid (0.114 g, 1 mmol) were added. Stirring was continued at 60 °C. After completion of the reaction (monitored by TLC), the crude residue was diluted with CH<sub>2</sub>Cl<sub>2</sub> and purified by chromatography to give the desired product **6**. White solid, yield: 80%. Mp: 177.8–179.3 °C, <sup>1</sup>H NMR (400 MHz, CDCl<sub>3</sub>): δ 7.74–7.19 (m, 11H), 7.13–6.65 (m, 4 H), 5.97 (s, 1H), 5.84 (s, 1H), 4.58–4.47 (m, 2H); <sup>13</sup>C NMR (100 MHz, CDCl<sub>3</sub>): δ 168.1, 157.5 (q, <sup>2</sup>*J*<sub>CF</sub> = 36.1 Hz), 137.7, 136.4, 132.5, 130.9, 130.7, 129.2, 129.0, 128.7, 128.4, 128.2, 127.5, 127.4, 116.3 (q, <sup>1</sup>*J*<sub>CF</sub> = 288.1 Hz), 67.3, 43.9; <sup>19</sup>F NMR (376 MHz, CDCl<sub>3</sub>): δ –67.3 (s, 3F).

**References**

1. Wu, J.; Cao, S.; Liu, N.; Shen, L.; Yu, J.; Zhang, J.; Li, H.; Qian, X. *Org. Biomol. Chem.* **2010**, *8*, 2386–2391. doi:10.1039/c000835d

<sup>1</sup>H NMR of **3a**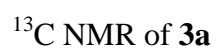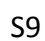

<sup>19</sup>F NMR of **3a**

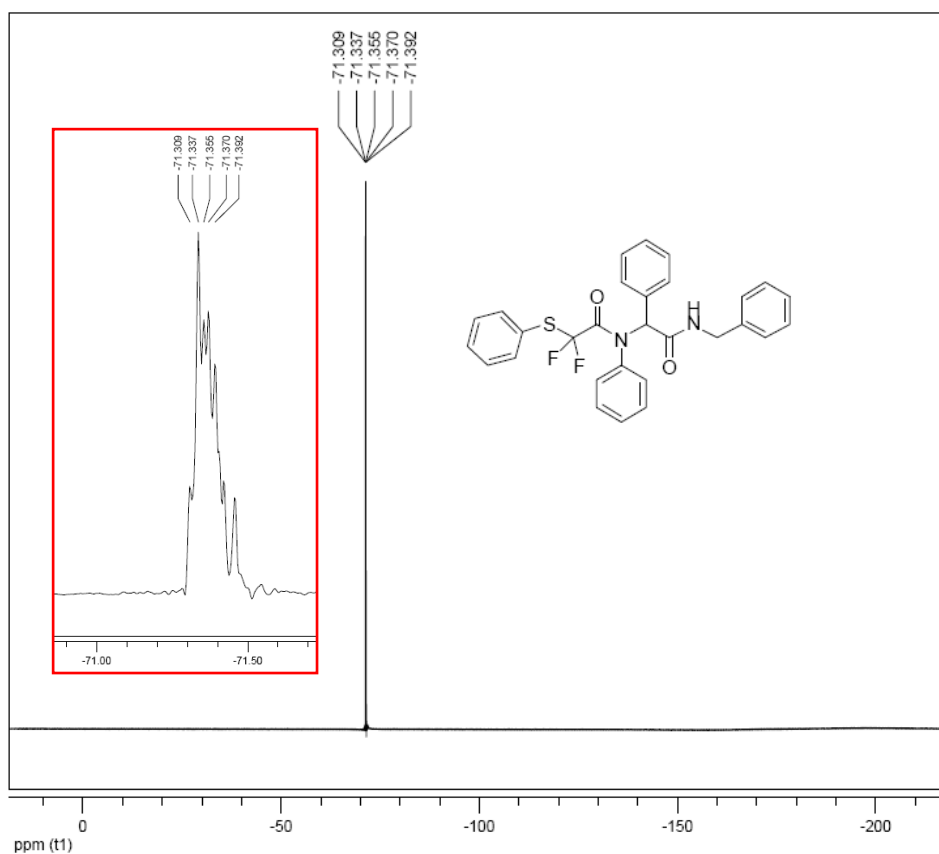

Date:  
4 Dec 2010  
Document's Title:  
1r  
  
Spectrum Title:  
None  
Frequency (MHz):  
(f1) 376.498  
Original Points Count:  
(f1) 65538  
Actual Points Count:  
(f1) 65538  
Acquisition Time (sec):  
(f1) 0.7340  
Spectral Width (ppm):  
(f1) 237.148  
Pulse Program:  
Unknown

<sup>1</sup>H NMR of **3b**

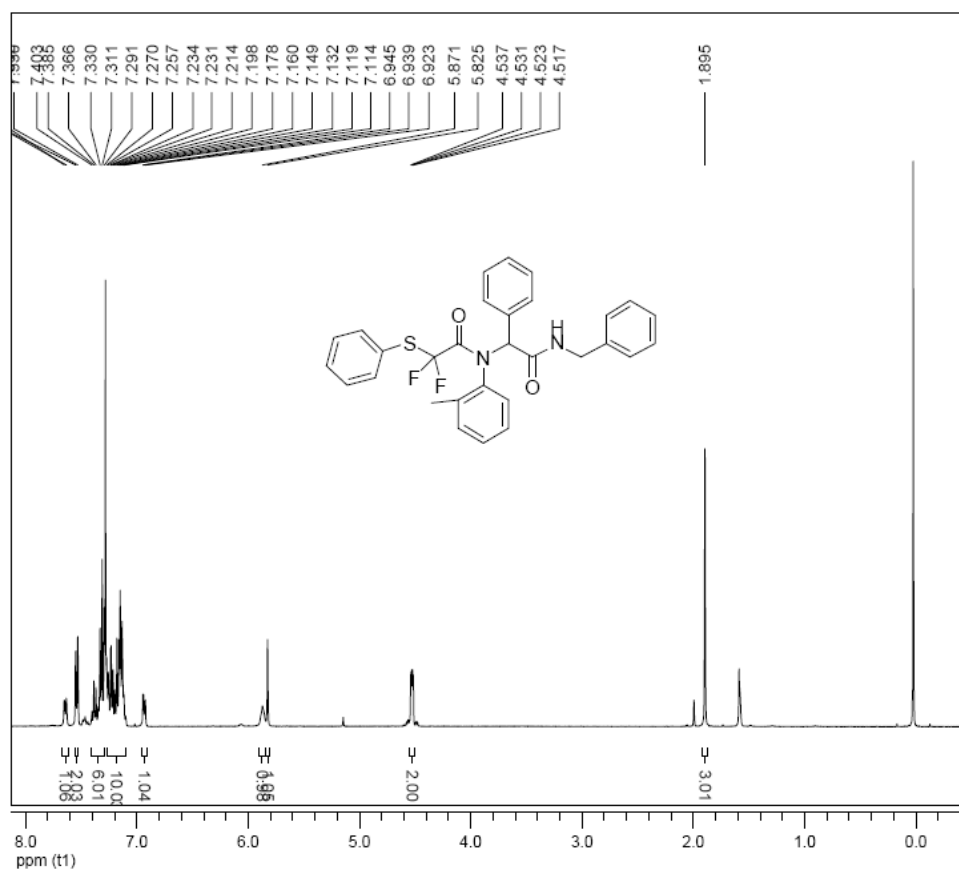

Date:  
4 Dec 2010  
Document's Title:  
LH02-b-H  
  
Spectrum Title:  
None  
Frequency (MHz):  
(f1) 400.130  
Original Points Count:  
(f1) 32788  
Actual Points Count:  
(f1) 32788  
Acquisition Time (sec):  
(f1) 3.9848  
Spectral Width (ppm):  
(f1) 20.563  
Pulse Program:  
Unknown

<sup>13</sup>C NMR of **3b**

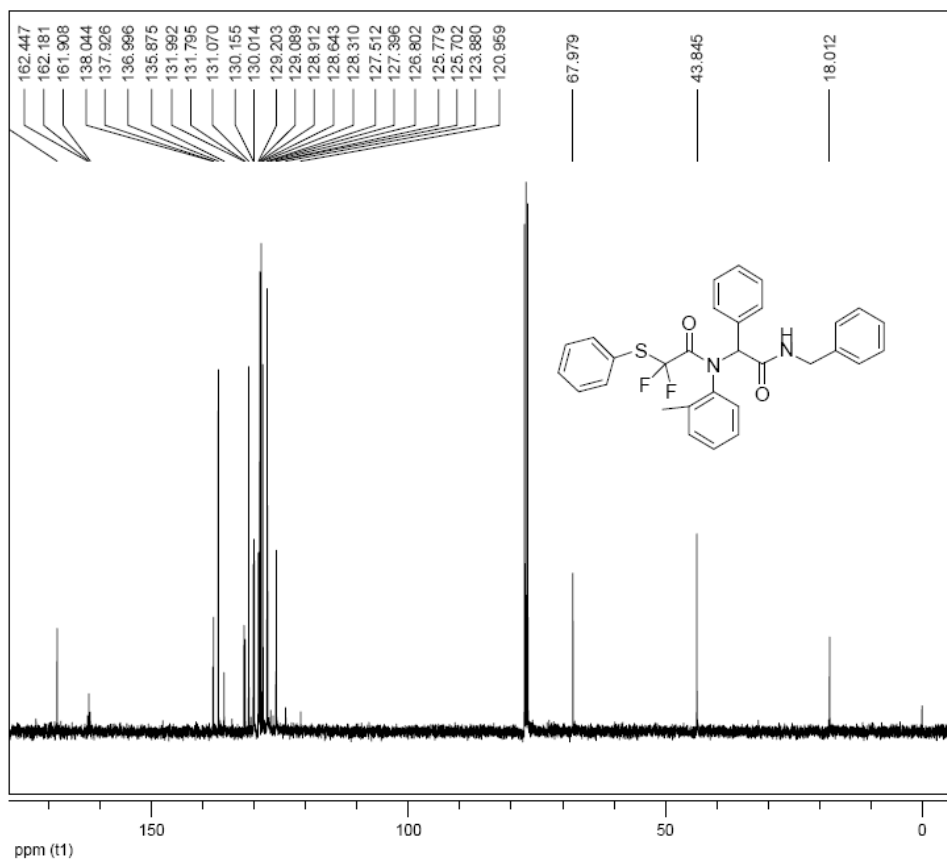

Date: 8 Dec 2010  
 Document's Title: LH02-b-C  
 Spectrum Title: None  
 Frequency (MHz): (f1) 100.613  
 Original Points Count: (f1) 32768  
 Actual Points Count: (f1) 32768  
 Acquisition Time (sec): (f1) 1.3631  
 Spectral Width (ppm): (f1) 236.921  
 Pulse Program: Unknown

<sup>19</sup>F NMR of **3b**

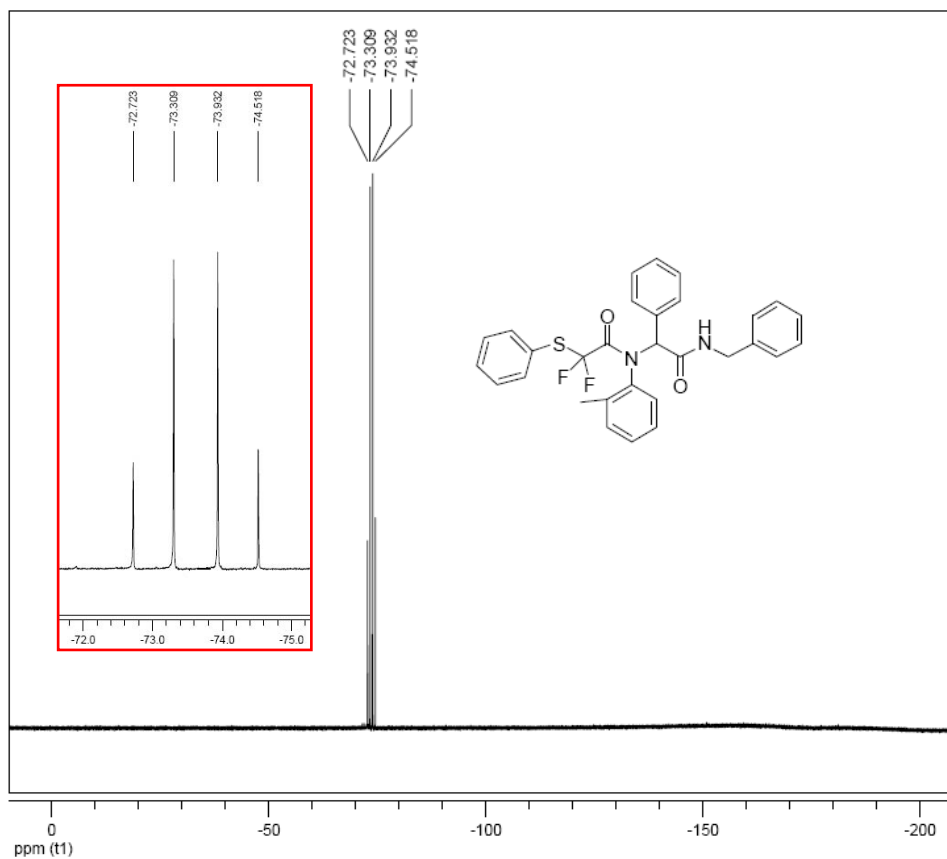

Date: 4 Dec 2010  
 Document's Title: LH02-b-F  
 Spectrum Title: None  
 Frequency (MHz): (f1) 376.498  
 Original Points Count: (f1) 65536  
 Actual Points Count: (f1) 65536  
 Acquisition Time (sec): (f1) 0.7340  
 Spectral Width (ppm): (f1) 237.148  
 Pulse Program: Unknown

# <sup>1</sup>H NMR of 3c

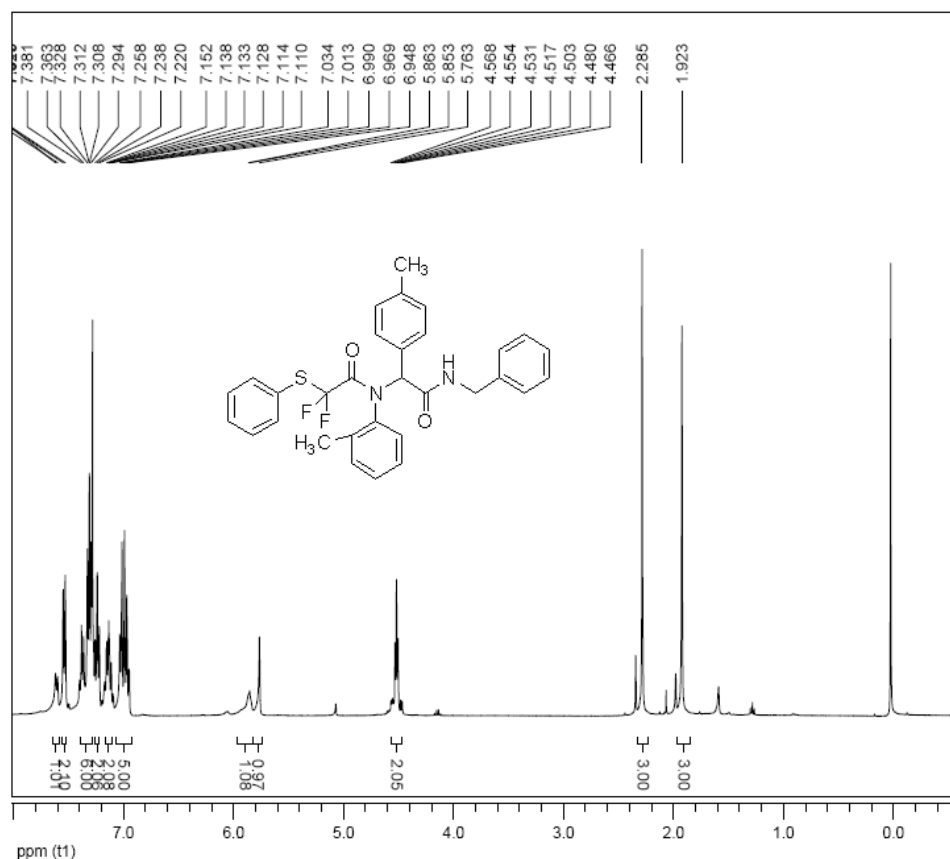

Date: 4 Dec 2010  
Document's Title: LH02-C-H  
Spectrum Title: None  
Frequency (MHz): (f1) 400.130  
Original Points Count: (f1) 32788  
Actual Points Count: (f1) 32788  
Acquisition Time (sec): (f1) 3.9948  
Spectral Width (ppm): (f1) 20.553  
Pulse Program: Unknown

# <sup>13</sup>C NMR of 3c

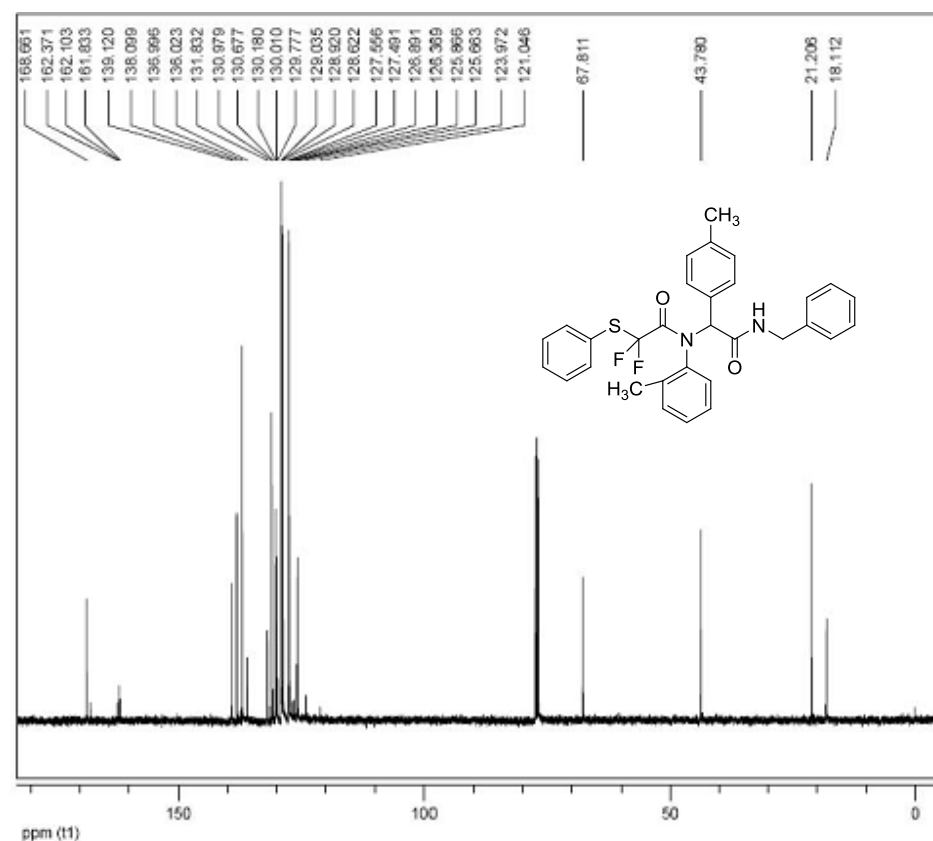

Date: 8 Dec 2010  
Document's Title: LH02-s-C  
Spectrum Title: None  
Frequency (MHz): (f1) 100.613  
Original Points Count: (f1) 32788  
Actual Points Count: (f1) 32788  
Acquisition Time (sec): (f1) 1.3631  
Spectral Width (ppm): (f1) 228.921  
Pulse Program: Unknown

<sup>19</sup>F NMR of **3c**

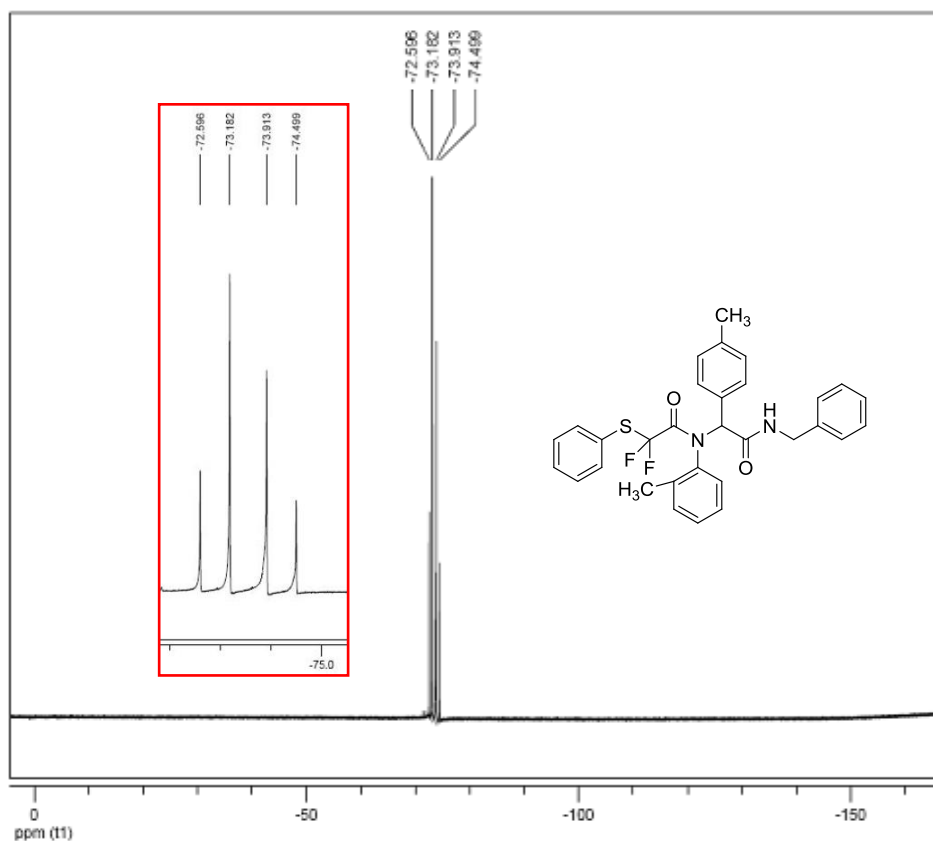

Date:  
4 Dec 2010  
Document's Title:  
LH02-c-F

Spectrum Title:  
None

Frequency (MHz):  
(f1) 375.498  
Original Points Count:  
(f1) 85538  
Actual Points Count:  
(f1) 85538  
Acquisition Time (sec):  
(f1) 0.7340  
Spectral Width (ppm):  
(f1) 237.148  
Pulse Program:  
Unknown

<sup>1</sup>H NMR of **3d**

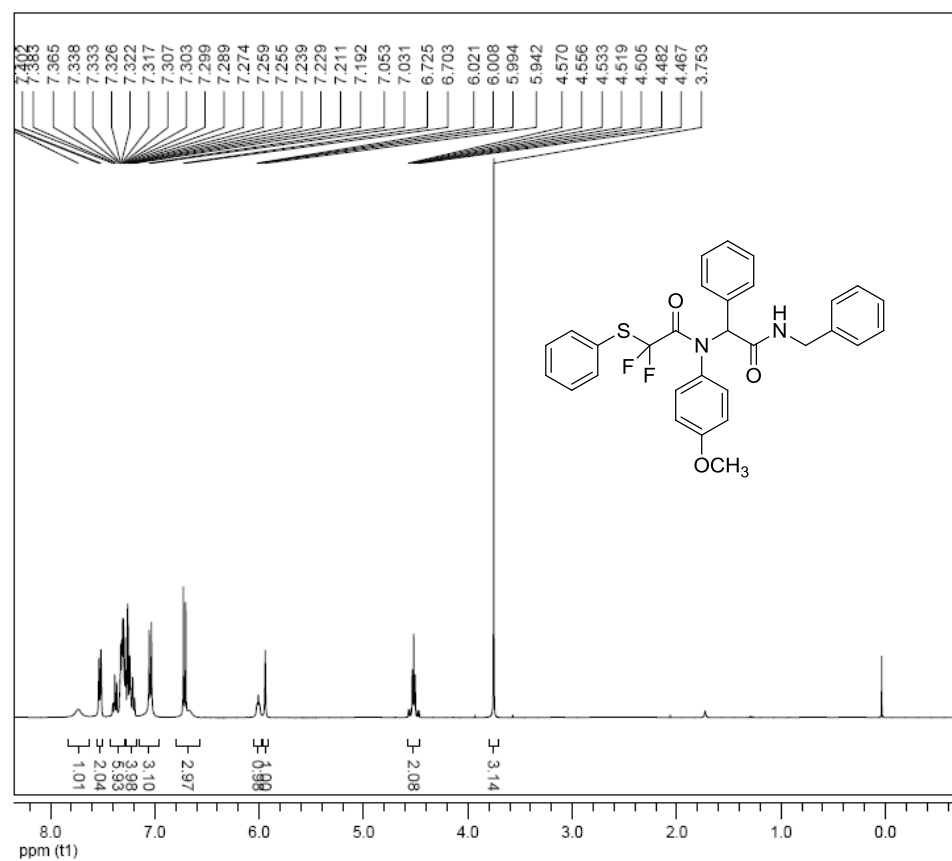

Date:  
8 Dec 2010  
Document's Title:  
LH02-d-H

Spectrum Title:  
None

Frequency (MHz):  
(f1) 400.130  
Original Points Count:  
(f1) 32768  
Actual Points Count:  
(f1) 32768  
Acquisition Time (sec):  
(f1) 3.6946  
Spectral Width (ppm):  
(f1) 20.553  
Pulse Program:  
Unknown

### <sup>13</sup>C NMR of 3d

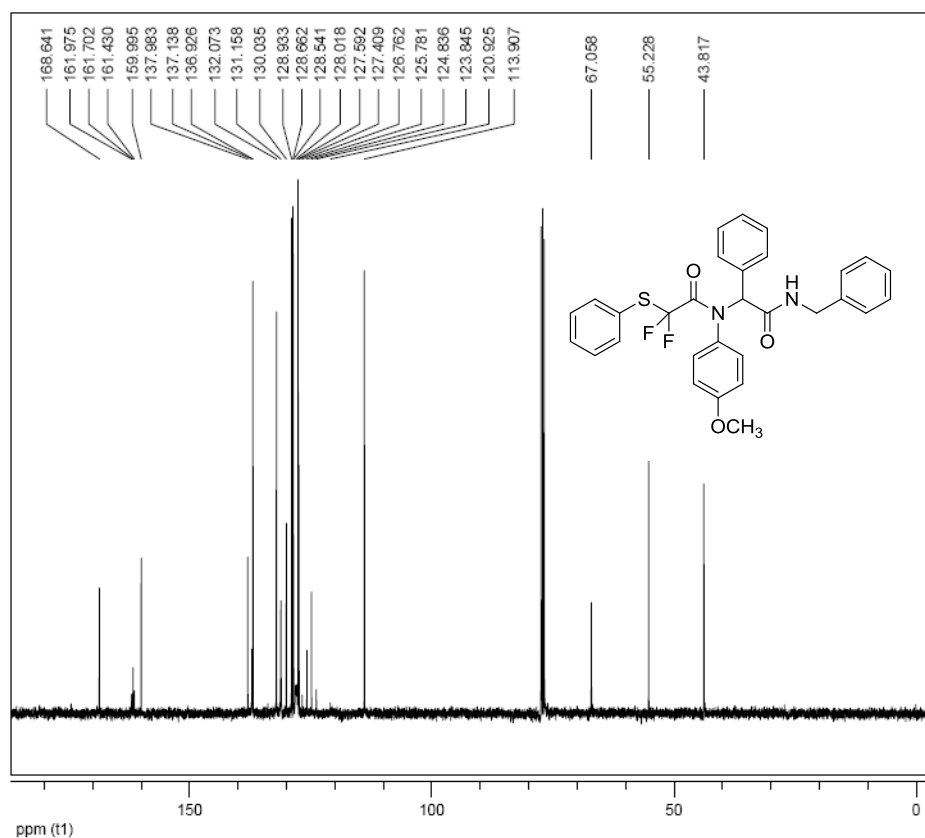

Date:  
8 Dec 2010  
Document's Title:  
LH02-d-C

Spectrum Title:  
None  
Frequency (MHz):  
(f1) 100.613  
Original Points Count:  
(f1) 32768  
Actual Points Count:  
(f1) 32768  
Acquisition Time (sec):  
(f1) 1.3631  
Spectral Width (ppm):  
(f1) 238.921  
Pulse Program:  
Unknown

### <sup>19</sup>F NMR of 3d

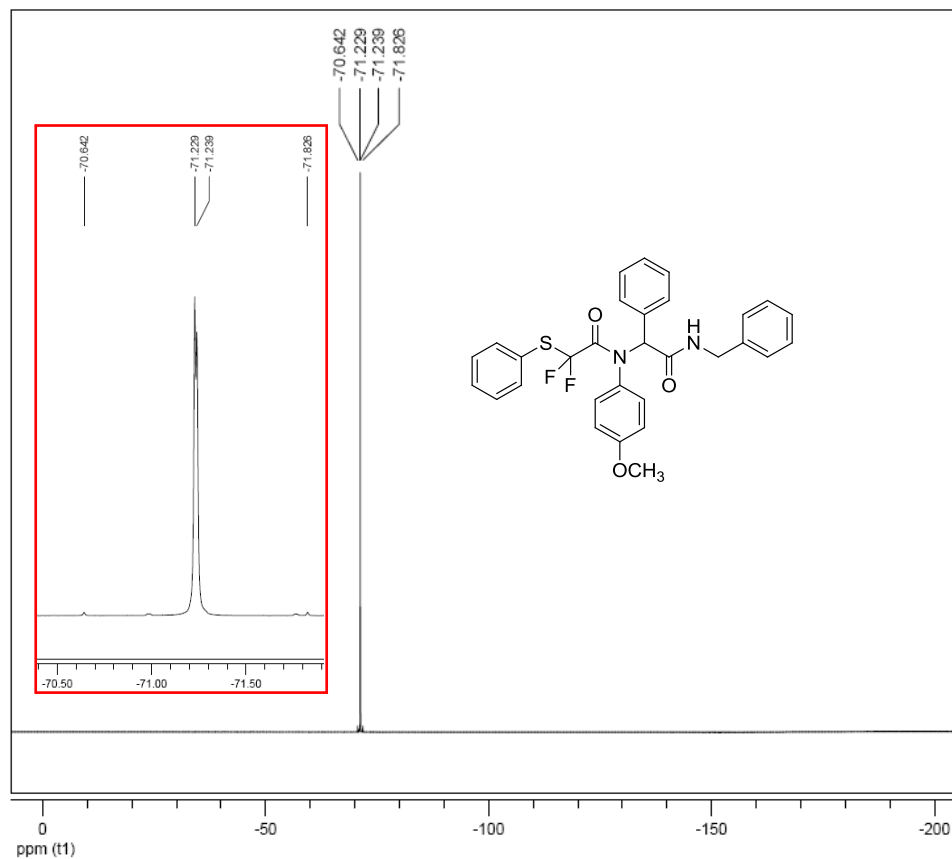

Date:  
8 Dec 2010  
Document's Title:  
LH02-d-F

Spectrum Title:  
None  
Frequency (MHz):  
(f1) 376.498  
Original Points Count:  
(f1) 65536  
Actual Points Count:  
(f1) 65536  
Acquisition Time (sec):  
(f1) 0.7340  
Spectral Width (ppm):  
(f1) 237.148  
Pulse Program:  
Unknown

# <sup>1</sup>H NMR of **3e**

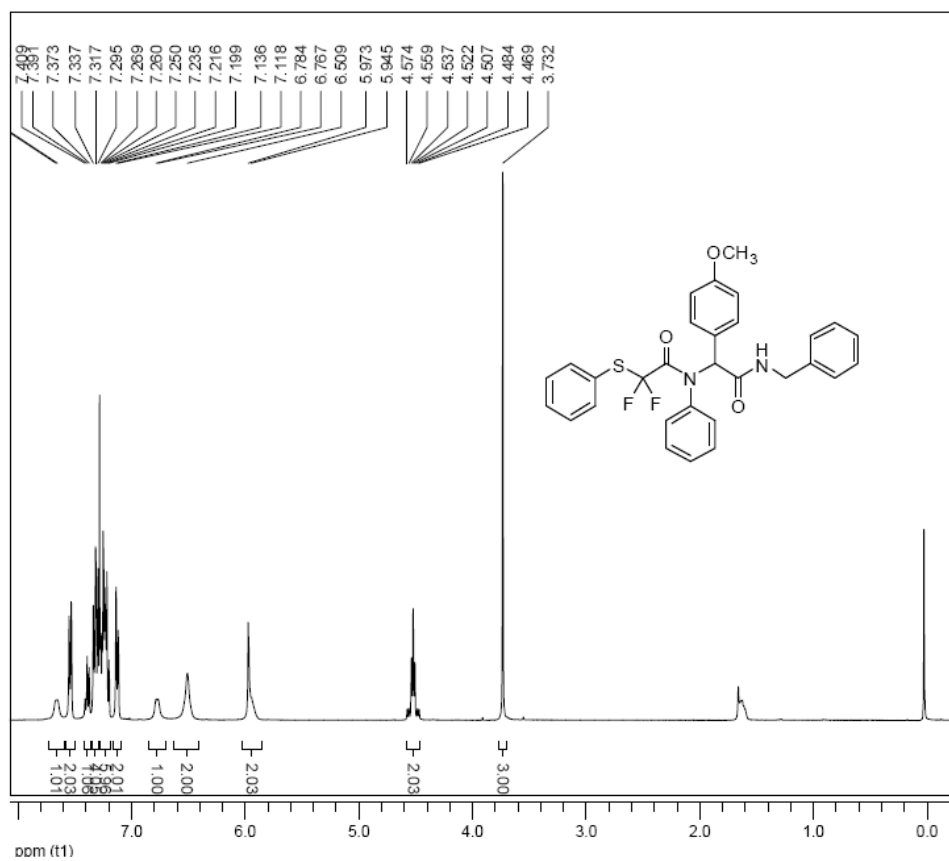

Date: 13 Sep 2010  
 Document's Title: LH02-e-H  
 Spectrum Title: None  
 Frequency (MHz): (f1) 400.130  
 Original Points Count: (f1) 32768  
 Actual Points Count: (f1) 32768  
 Acquisition Time (sec): (f1) 3.9846  
 Spectral Width (ppm): (f1) 20.553  
 Pulse Program: Unknown

# <sup>13</sup>C NMR of **3e**

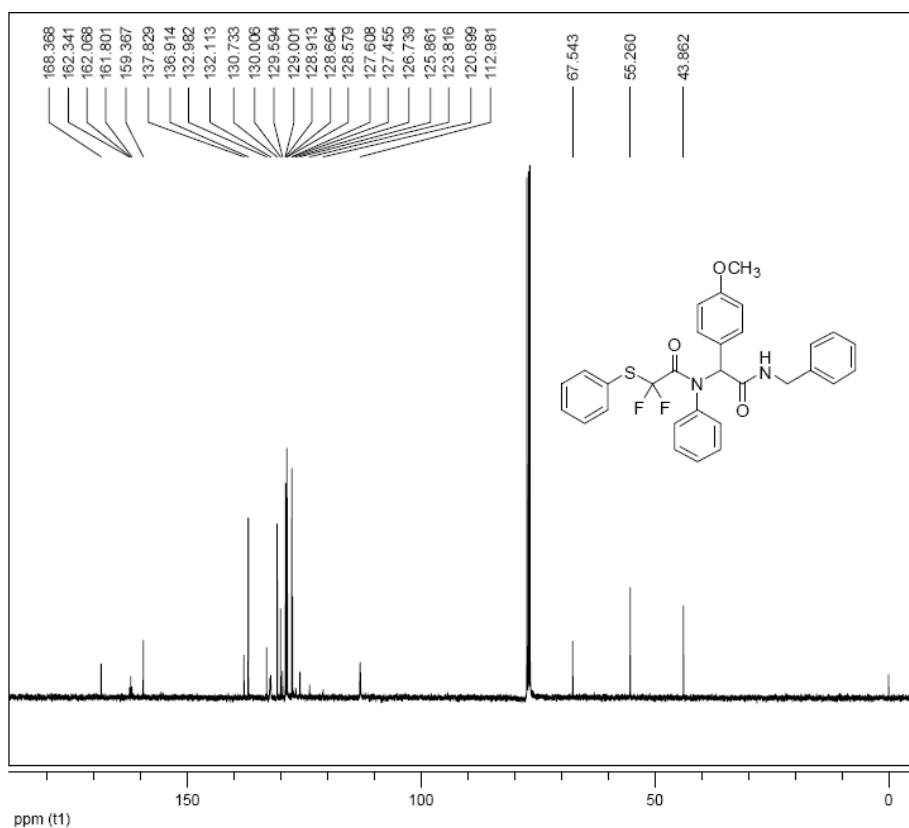

Date: 8 Dec 2010  
 Document's Title: LH02-e-c  
 Spectrum Title: None  
 Frequency (MHz): (f1) 100.613  
 Original Points Count: (f1) 32768  
 Actual Points Count: (f1) 32768  
 Acquisition Time (sec): (f1) 1.3631  
 Spectral Width (ppm): (f1) 238.921  
 Pulse Program: Unknown

<sup>19</sup>F NMR of **3e**

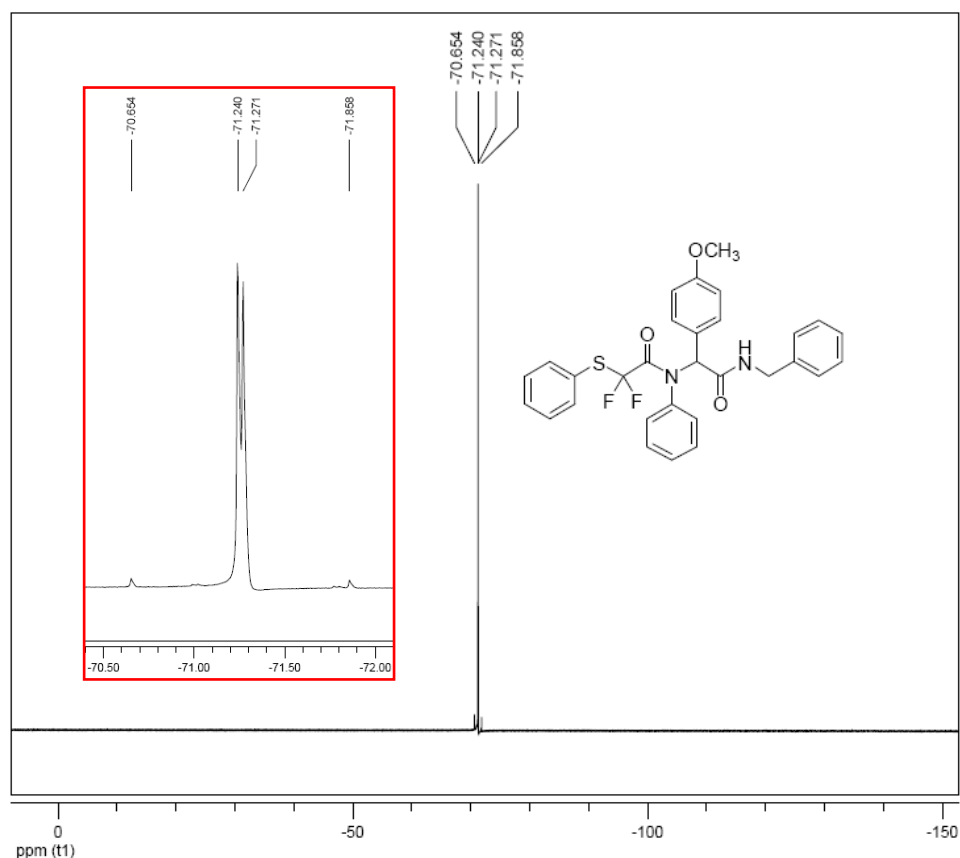

Date: 13 Sep 2010  
 Document's Title: LH02-e-F  
 Spectrum Title: None  
 Frequency (MHz): (f1) 376.498  
 Original Points Count: (f1) 65538  
 Actual Points Count: (f1) 65538  
 Acquisition Time (sec): (f1) 0.7340  
 Spectral Width (ppm): (f1) 237.148  
 Pulse Program: Unknown

<sup>1</sup>H NMR of **3f**

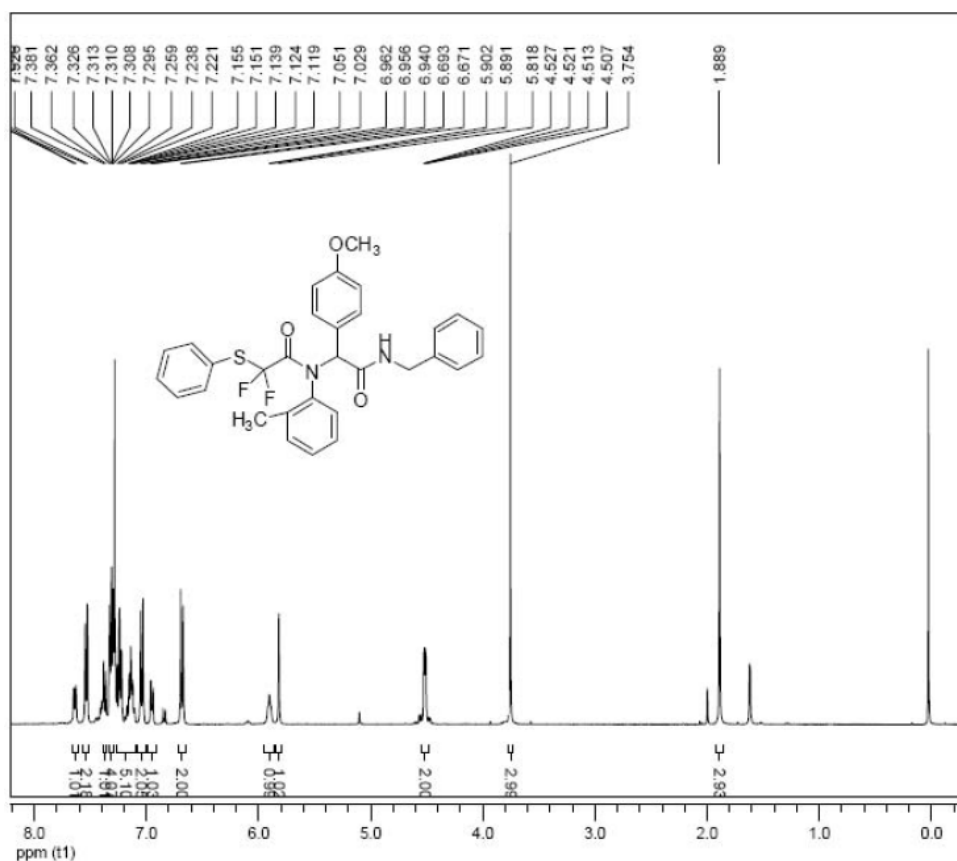

Date: 4 Dec 2010  
 Document's Title: LH02-F-H-不純  
 Spectrum Title: None  
 Frequency (MHz): (f1) 400.130  
 Original Points Count: (f1) 32768  
 Actual Points Count: (f1) 32768  
 Acquisition Time (sec): (f1) 3.9846  
 Spectral Width (ppm): (f1) 20.553  
 Pulse Program: Unknown

### $^{13}\text{C}$ NMR of **3f**

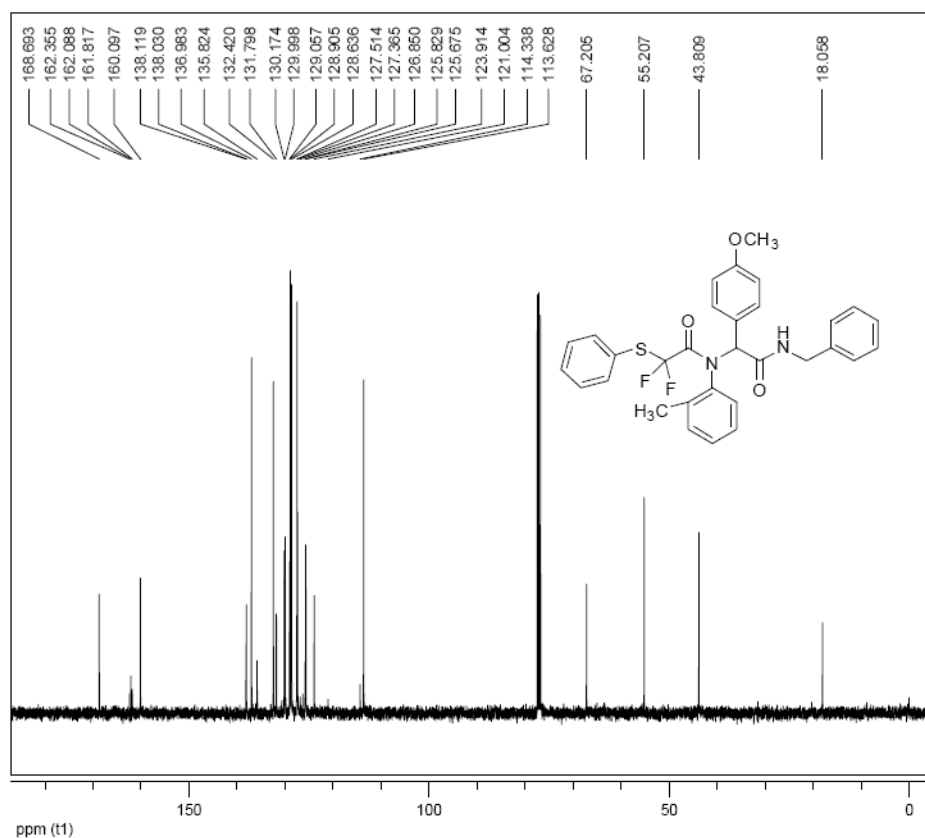

Date: 8 Dec 2010  
Document's Title: LH02-F-C  
Spectrum Title: None  
Frequency (MHz): (f1) 100.613  
Original Points Count: (f1) 32768  
Actual Points Count: (f1) 32768  
Acquisition Time (sec): (f1) 1.3631  
Spectral Width (ppm): (f1) 238.921  
Pulse Program: Unknown

### $^{19}\text{F}$ NMR of **3f**

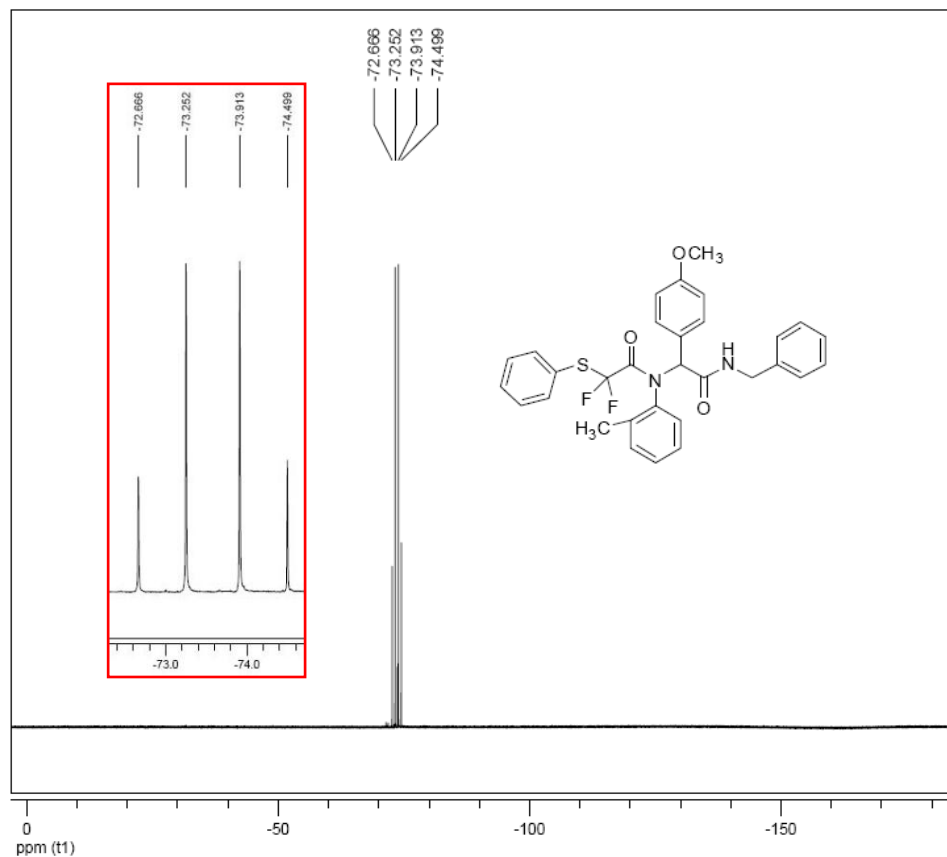

Date: 4 Dec 2010  
Document's Title: LH02-F-F  
Spectrum Title: None  
Frequency (MHz): (f1) 376.498  
Original Points Count: (f1) 65536  
Actual Points Count: (f1) 65536  
Acquisition Time (sec): (f1) 0.7340  
Spectral Width (ppm): (f1) 237.148  
Pulse Program: Unknown

<sup>1</sup>H NMR of **3g**

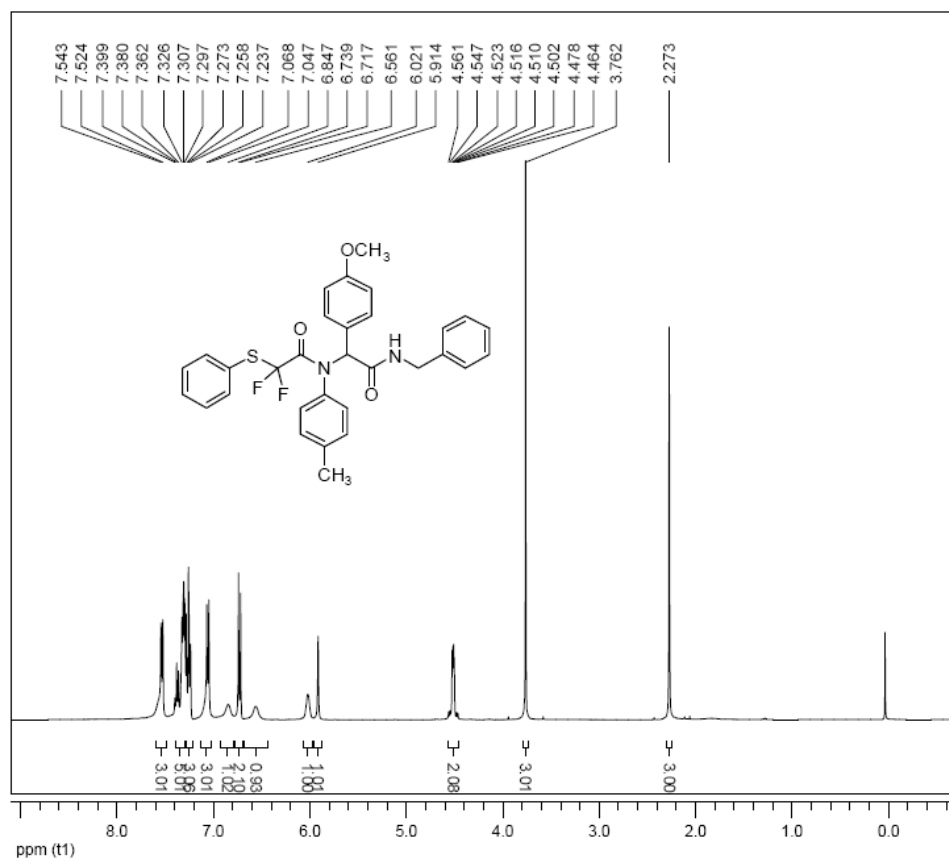

Date: 8 Dec 2010  
 Document's Title: LH02-g-H  
 Spectrum Title: None  
 Frequency (MHz): (f1) 400.130  
 Original Points Count: (f1) 32768  
 Actual Points Count: (f1) 32768  
 Acquisition Time (sec): (f1) 3.9846  
 Spectral Width (ppm): (f1) 20.553  
 Pulse Program: Unknown

<sup>13</sup>C NMR of **3g**

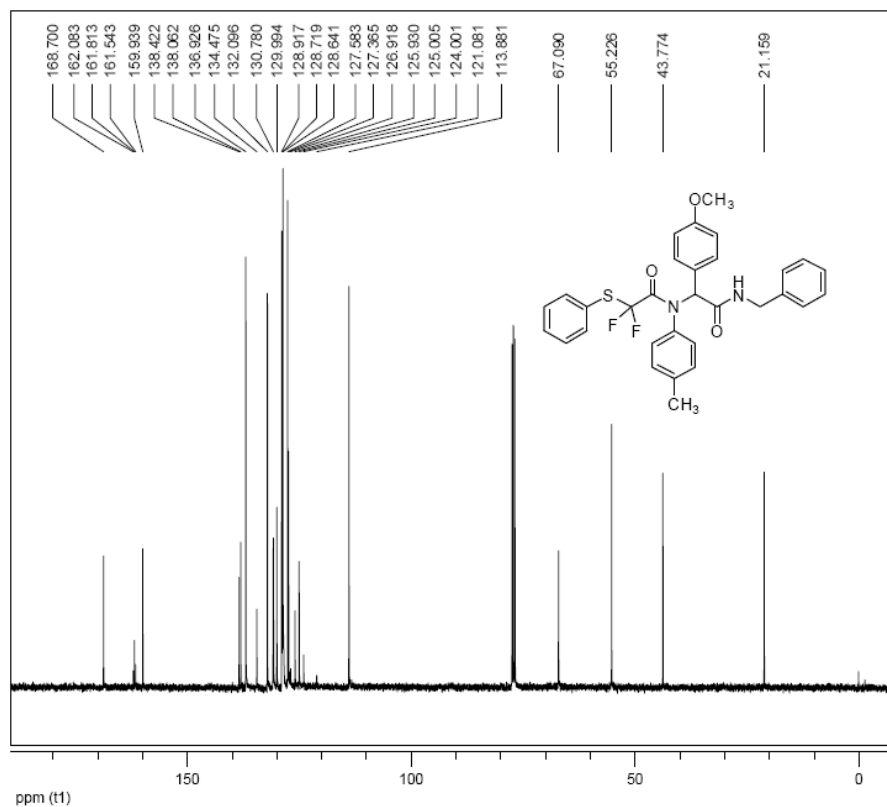

Date: 8 Dec 2010  
 Document's Title: LH02-g-C  
 Spectrum Title: None  
 Frequency (MHz): (f1) 100.613  
 Original Points Count: (f1) 32768  
 Actual Points Count: (f1) 32768  
 Acquisition Time (sec): (f1) 1.3631  
 Spectral Width (ppm): (f1) 238.921  
 Pulse Program: Unknown

<sup>19</sup>F NMR of **3g**

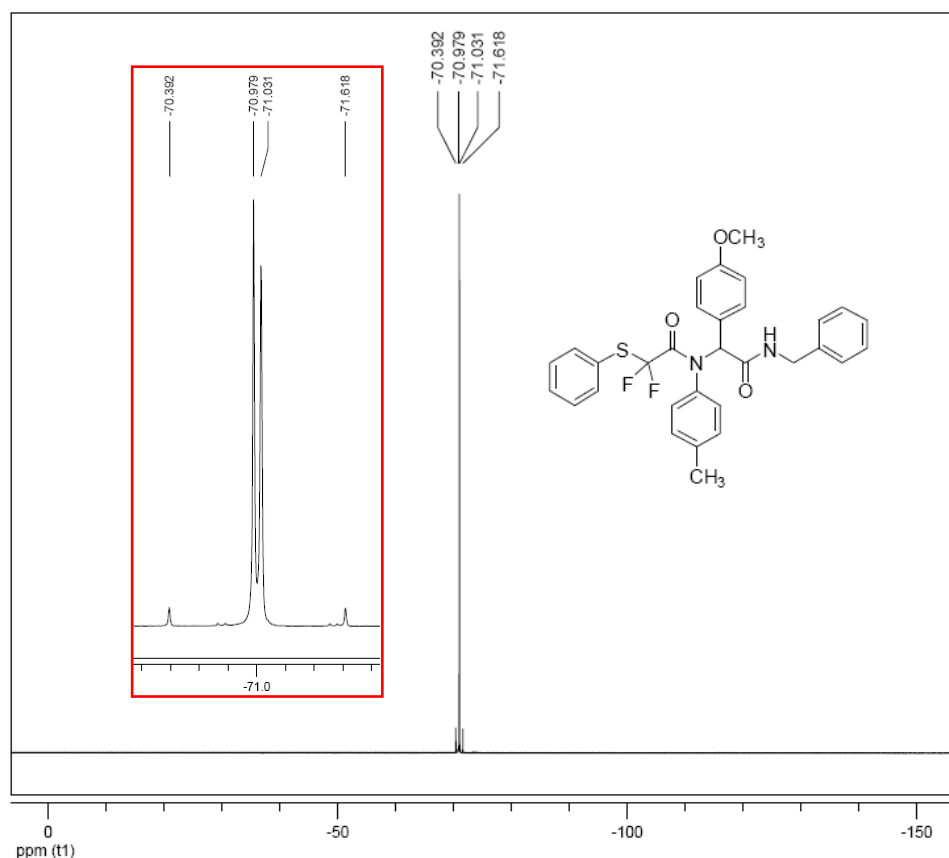

Date:  
16 Sep 2010  
Document's Title:  
LH02-g-F

Spectrum Title:  
None  
Frequency (MHz):  
(f1) 376.498  
Original Points Count:  
(f1) 65538  
Actual Points Count:  
(f1) 65538  
Acquisition Time (sec):  
(f1) 0.7340  
Spectral Width (ppm):  
(f1) 237.148  
Pulse Program:  
Unknown

<sup>1</sup>H NMR of **3h**

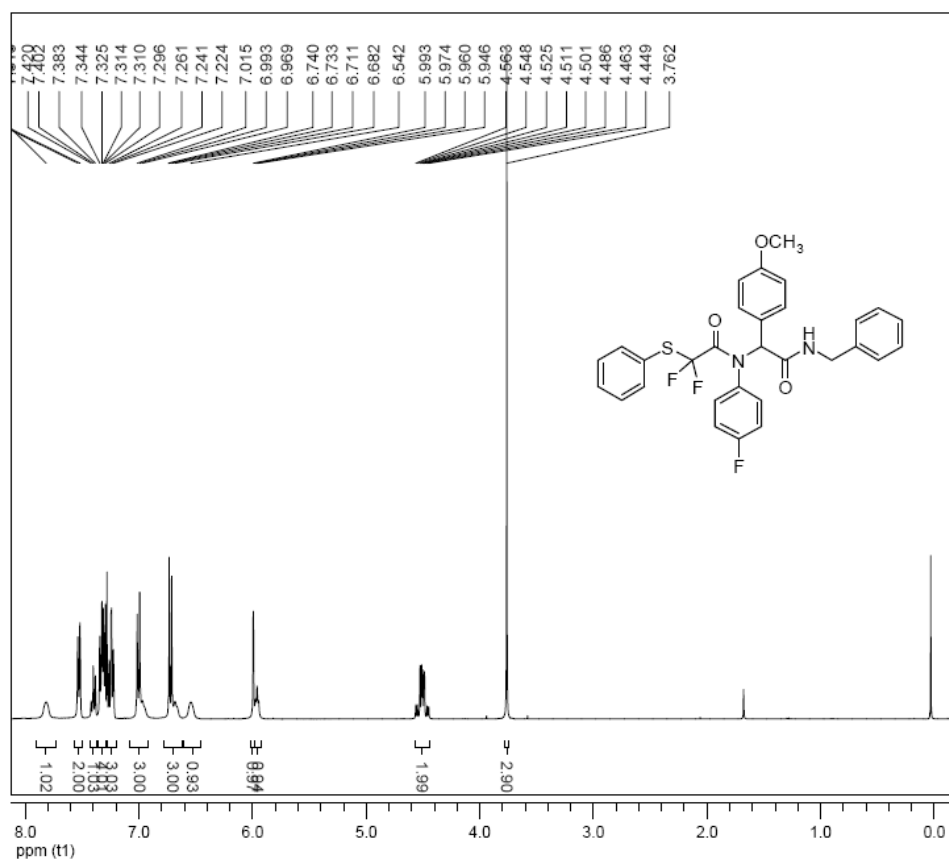

Date:  
16 Sep 2010  
Document's Title:  
LH02-h-H

Spectrum Title:  
None  
Frequency (MHz):  
(f1) 400.130  
Original Points Count:  
(f1) 32768  
Actual Points Count:  
(f1) 32768  
Acquisition Time (sec):  
(f1) 3.6846  
Spectral Width (ppm):  
(f1) 20.553  
Pulse Program:  
Unknown

### <sup>13</sup>C NMR of **3h**

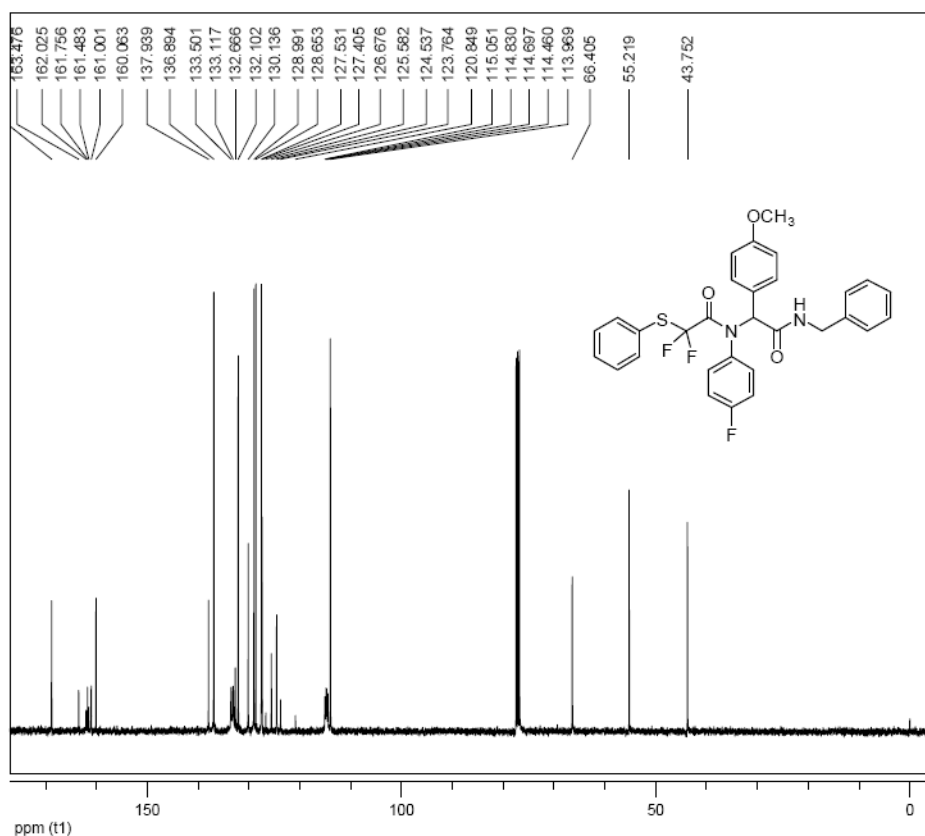

Date:  
18 Sep 2010  
Document's Title:  
LH02-h-C

Spectrum Title:  
None  
Frequency (MHz):  
(f1) 100.613  
Original Points Count:  
(f1) 32768  
Actual Points Count:  
(f1) 32768  
Acquisition Time (sec):  
(f1) 1.3631  
Spectral Width (ppm):  
(f1) 238.921  
Pulse Program:  
Unknown

### <sup>19</sup>F NMR of **3h**

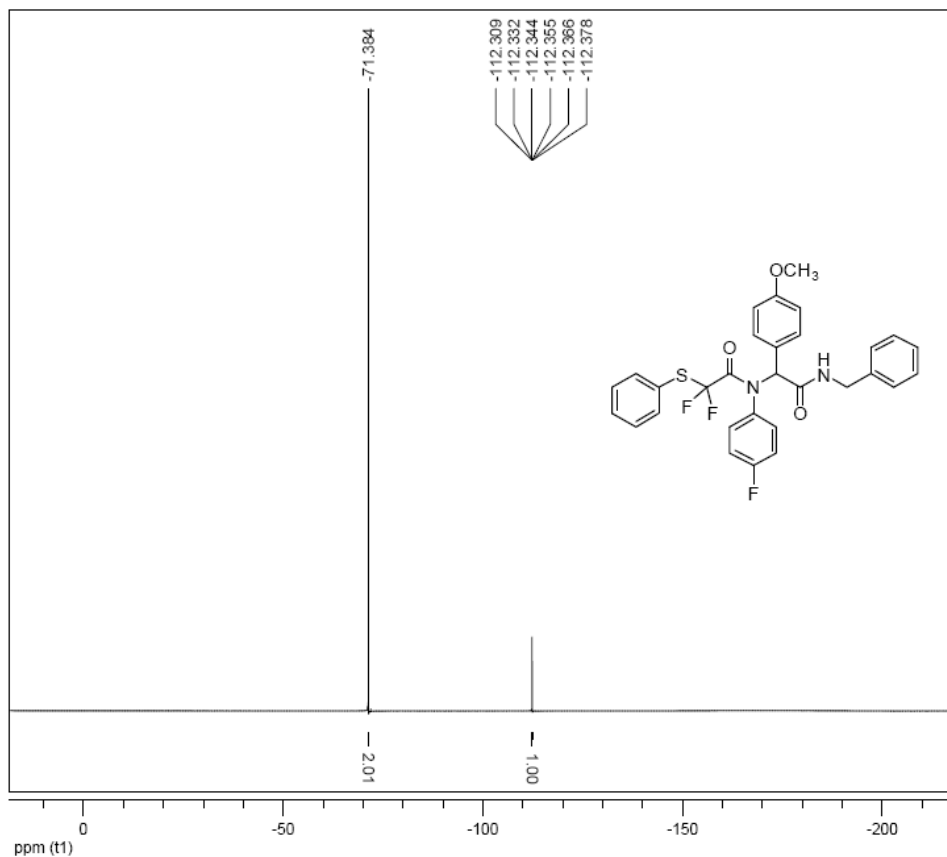

Date:  
12 Oct 2010  
Document's Title:  
LH02-h-F

Spectrum Title:  
None  
Frequency (MHz):  
(f1) 376.498  
Original Points Count:  
(f1) 65536  
Actual Points Count:  
(f1) 65536  
Acquisition Time (sec):  
(f1) 0.7340  
Spectral Width (ppm):  
(f1) 237.148  
Pulse Program:  
Unknown

# <sup>1</sup>H NMR of **3i**

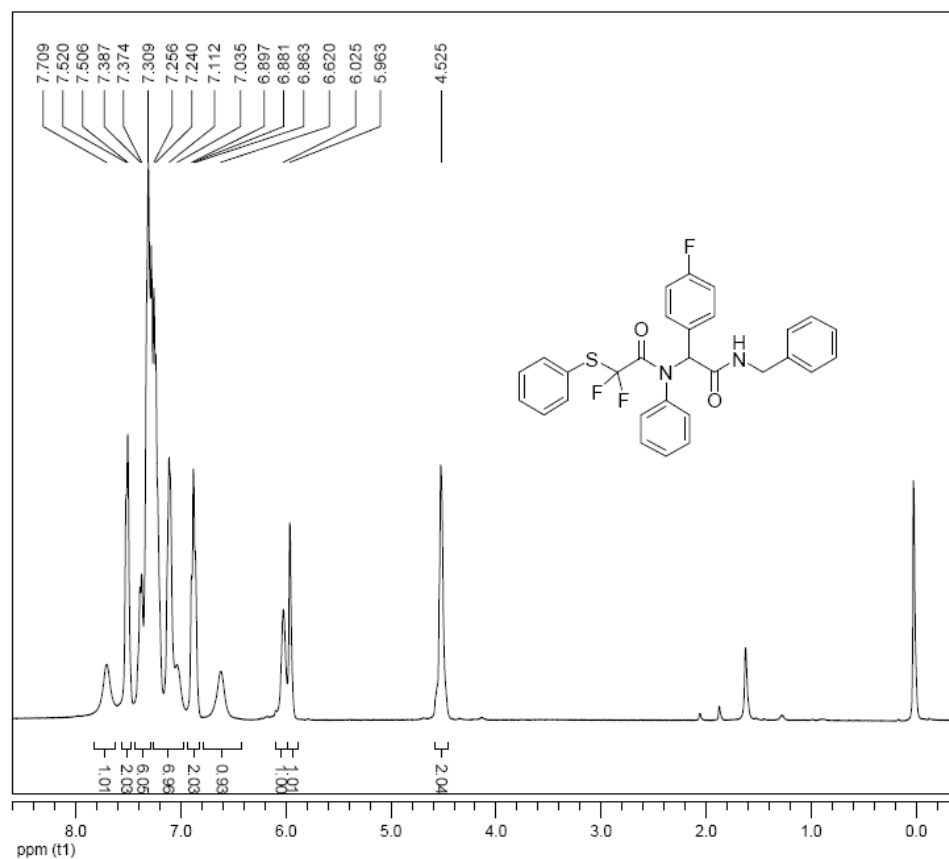

Date:  
8 Dec 2010  
Document's Title:  
LH02-i-H

Spectrum Title:  
None  
Frequency (MHz):  
(f1) 400.130  
Original Points Count:  
(f1) 32768  
Actual Points Count:  
(f1) 32768  
Acquisition Time (sec):  
(f1) 3.9846  
Spectral Width (ppm):  
(f1) 20.553  
Pulse Program:  
Unknown

# <sup>13</sup>C NMR of **3i**

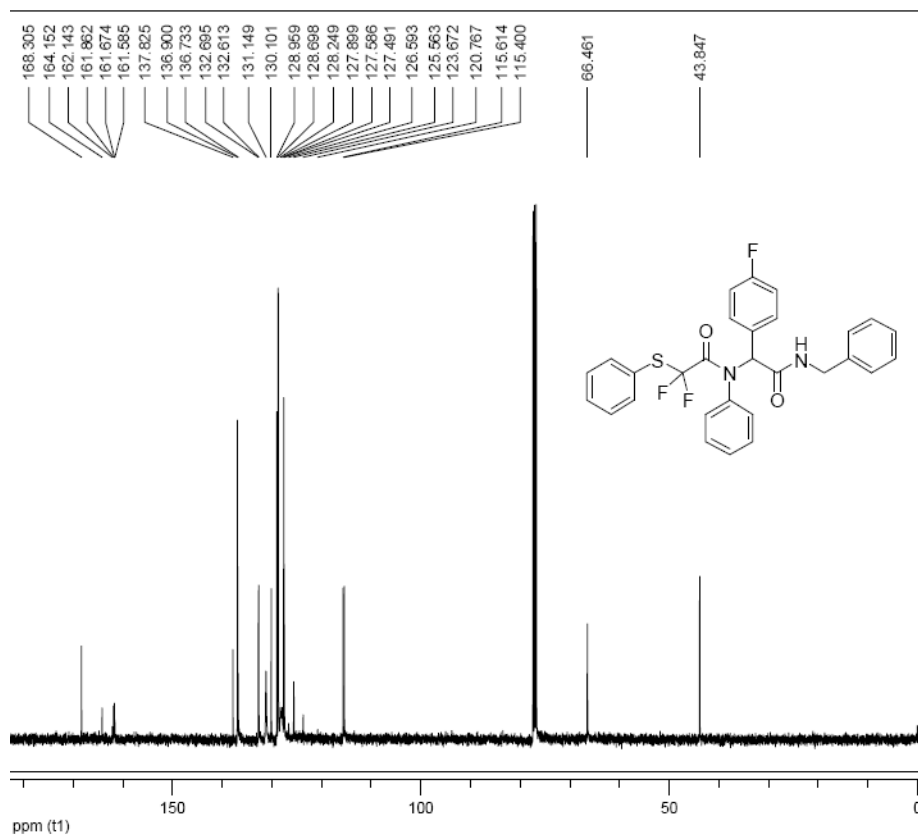

Date:  
18 Sep 2010  
Document's Title:  
LH02-i-C

Spectrum Title:  
None  
Frequency (MHz):  
(f1) 100.613  
Original Points Count:  
(f1) 32768  
Actual Points Count:  
(f1) 32768  
Acquisition Time (sec):  
(f1) 1.3631  
Spectral Width (ppm):  
(f1) 238.921  
Pulse Program:  
Unknown

<sup>19</sup>F NMR of **3i**

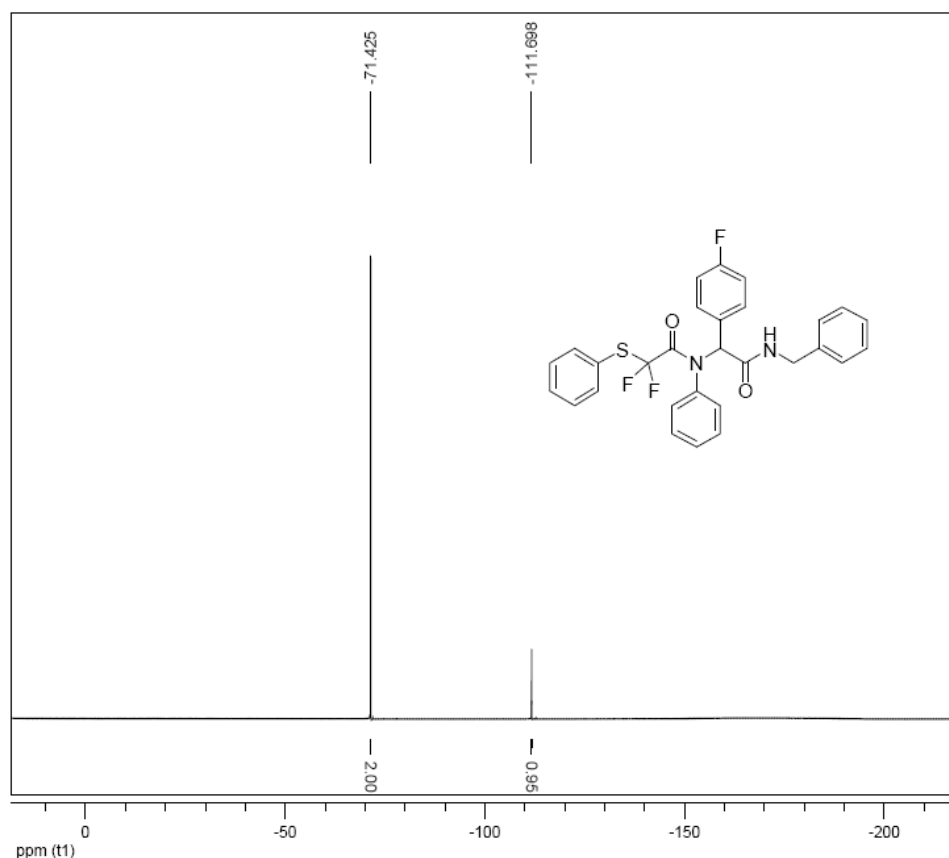

Date: 12 Oct 2010  
 Document's Title: LH02-I-F  
 Spectrum Title: None  
 Frequency (MHz): (f1) 376.496  
 Original Points Count: (f1) 65536  
 Actual Points Count: (f1) 65536  
 Acquisition Time (sec): (f1) 0.7340  
 Spectral Width (ppm): (f1) 237.148  
 Pulse Program: Unknown

<sup>1</sup>H NMR of **3j**

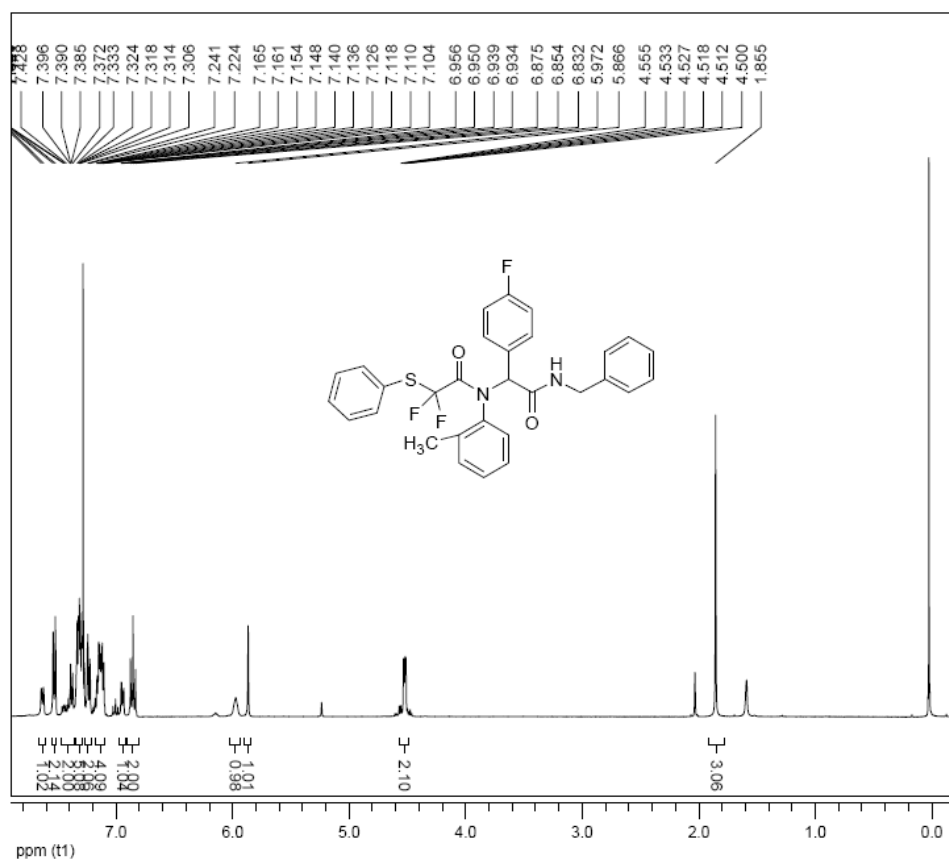

Date: 5 Dec 2010  
 Document's Title: LH02-j-H  
 Spectrum Title: None  
 Frequency (MHz): (f1) 400.130  
 Original Points Count: (f1) 32768  
 Actual Points Count: (f1) 32768  
 Acquisition Time (sec): (f1) 3.9846  
 Spectral Width (ppm): (f1) 20.553  
 Pulse Program: Unknown

# <sup>13</sup>C NMR of **3j**

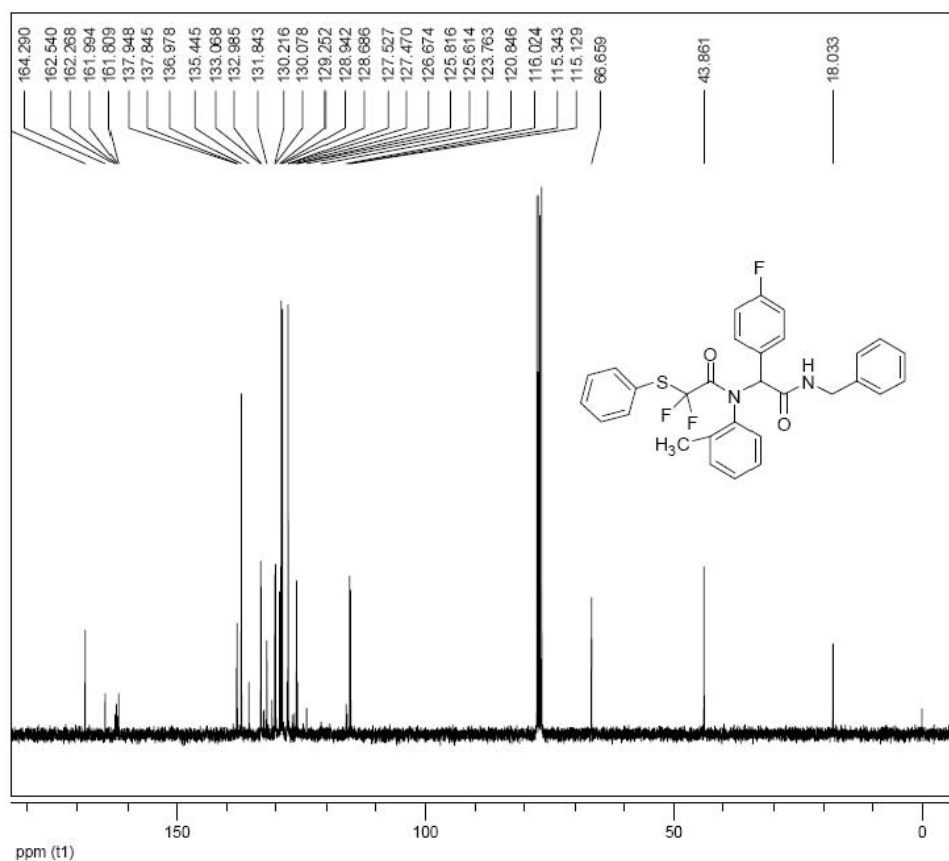

Date:  
5 Dec 2010  
Document's Title:  
LH02-j-C

Spectrum Title:  
None  
Frequency (MHz):  
(f1) 100.613  
Original Points Count:  
(f1) 32788  
Actual Points Count:  
(f1) 32788  
Acquisition Time (sec):  
(f1) 1.3831  
Spectral Width (ppm):  
(f1) 238.921  
Pulse Program:  
Unknown

# <sup>19</sup>F NMR of **3j**

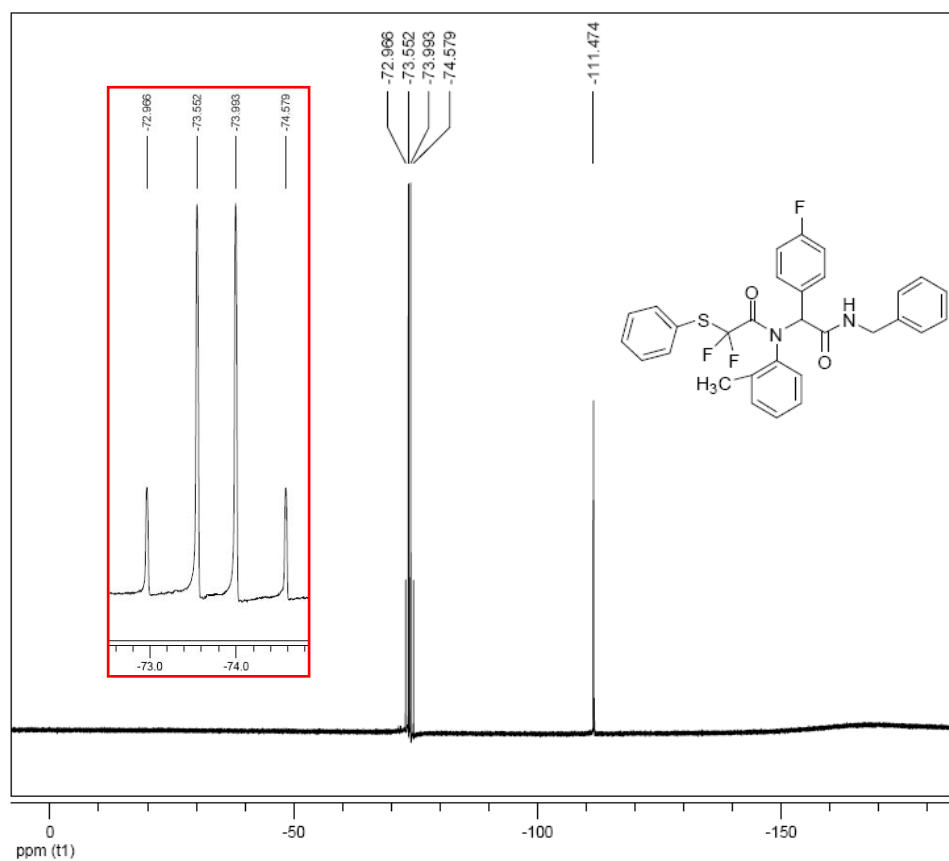

Date:  
5 Dec 2010  
Document's Title:  
LH02-j-F

Spectrum Title:  
None  
Frequency (MHz):  
(f1) 376.498  
Original Points Count:  
(f1) 65536  
Actual Points Count:  
(f1) 65536  
Acquisition Time (sec):  
(f1) 0.7340  
Spectral Width (ppm):  
(f1) 237.148  
Pulse Program:  
Unknown

Chemical structure of N-(4-methoxyphenyl)-2-(benzylamino)-2-(4-fluorophenyl)-1,1,1-trifluoroethan-1-one is shown. The structure features a central carbon atom bonded to a trifluoromethyl group, a 4-fluorophenyl group, a 4-methoxyphenyl group, and a benzylamino group.

<sup>1</sup>H NMR spectrum (CDCl<sub>3</sub>) data:

| Chemical Shift (ppm)                                                                                    | Integration                                                                              |
|---------------------------------------------------------------------------------------------------------|------------------------------------------------------------------------------------------|
| 7.416, 7.404, 7.398, 7.379, 7.341, 7.327, 7.323, 7.309, 7.304, 7.292, 7.288, 7.275, 7.266, 7.252, 7.235 | 0.98, 0.99, 0.99, 0.99, 0.99, 0.99, 0.99, 0.99, 0.99, 0.99, 0.99, 0.99, 0.99, 0.99, 0.99 |
| 6.922, 6.917, 6.900, 6.879, 6.791, 6.772, 6.509, 6.479, 5.973                                           | 2.00, 2.00, 2.00, 2.00, 2.00, 2.00, 2.00, 2.00, 2.00                                     |
| 4.571, 4.557, 4.534, 4.524, 4.520, 4.510, 4.487, 4.473, 3.748                                           | 2.00, 2.00, 2.00, 2.00, 2.00, 2.00, 2.00, 2.00, 2.00                                     |
| 3.800                                                                                                   | 3.02                                                                                     |
| 2.800                                                                                                   | 2.05                                                                                     |

**Date:**  
28 Sep 2010  
**Document's Title:**  
LH02-k-H  
**Spectrum Title:**  
None  
**Frequency (MHz):**  
(f1) 400.130  
**Original Points Count:**  
(f1) 32768  
**Actual Points Count:**  
(f1) 32768  
**Acquisition Time (sec):**  
(f1) 3.9846  
**Spectral Width (ppm):**  
(f1) 20.553  
**Pulse Program:**  
Unknown

Chemical structure of compound 10: COc1ccc(N(C(=O)Cc2ccccc2)C(c3ccc(F)cc3)C(=O)C(F)(F)Sc4ccccc4)cc1

<sup>13</sup>C NMR spectrum (ppm (t1)) showing peaks at the following chemical shifts (ppm): 168.428, 164.140, 162.408, 162.142, 161.872, 161.663, 159.447, 137.846, 136.885, 132.748, 132.666, 132.456, 132.193, 130.072, 129.078, 128.950, 128.811, 128.681, 127.575, 127.471, 126.660, 125.706, 123.747, 120.823, 115.605, 115.390, 113.058, 66.198, 55.270, 43.806.

**Date:**  
25 Sep 2010  
**Document's Title:**  
LH02-k-C

---

**Spectrum Title:**  
None  
**Frequency (MHz):**  
(f1) 100.613  
**Original Points Count:**  
(f1) 32768  
**Actual Points Count:**  
(f1) 32768  
**Acquisition Time (sec):**  
(f1) 1.3631  
**Spectral Width (ppm):**  
(f1) 238.921  
**Pulse Program:**  
Unknown

<sup>19</sup>F NMR of **3k**

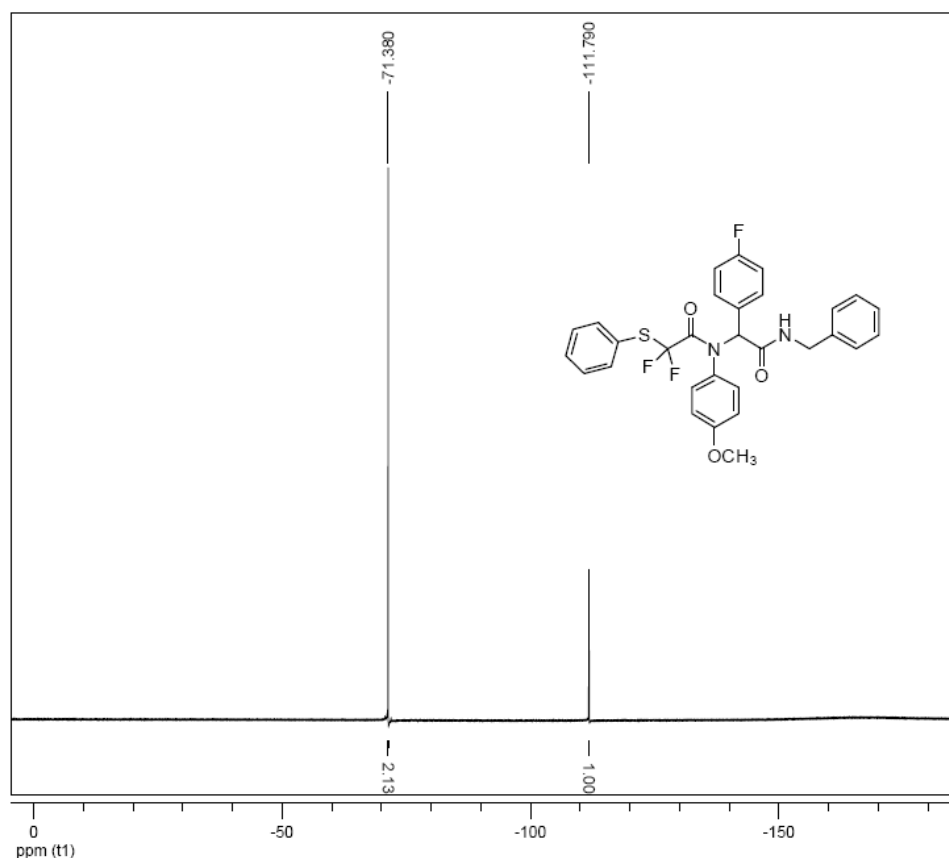

Date: 25 Sep 2010  
 Document's Title: LH02-k-F  
 Spectrum Title: None  
 Frequency (MHz): (f1) 376.498  
 Original Points Count: (f1) 65538  
 Actual Points Count: (f1) 65538  
 Acquisition Time (sec): (f1) 0.7340  
 Spectral Width (ppm): (f1) 237.148  
 Pulse Program: Unknown

<sup>1</sup>H NMR of **3l**

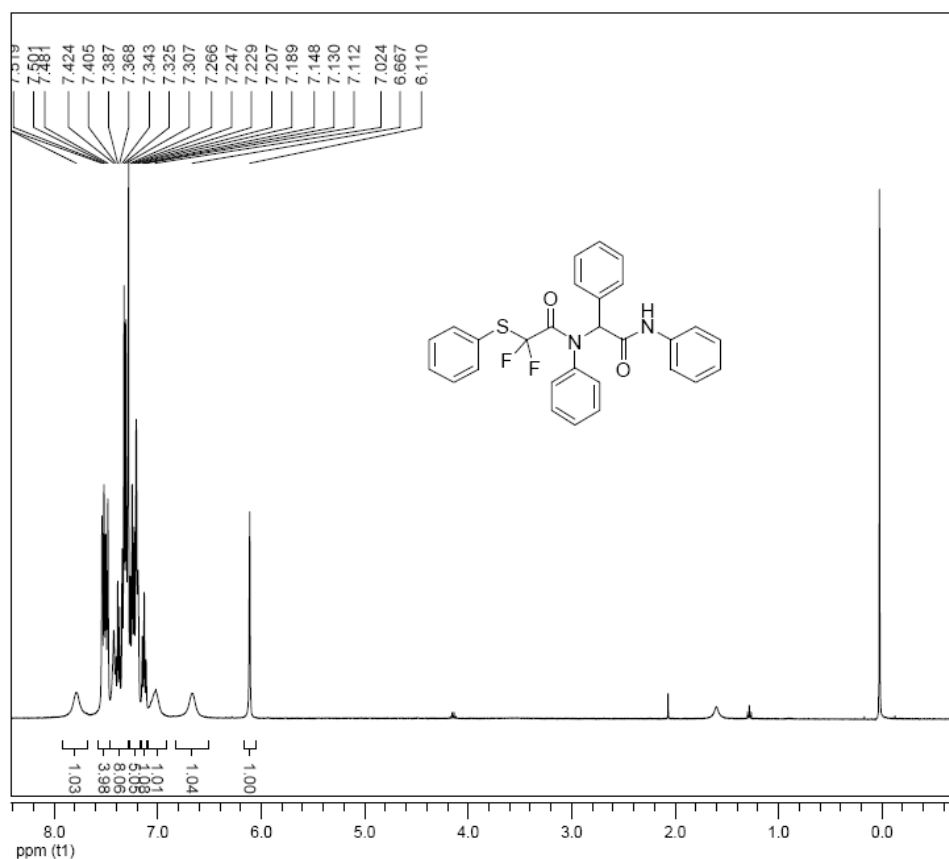

Date: 5 Dec 2010  
 Document's Title: LH02-m-H  
 Spectrum Title: None  
 Frequency (MHz): (f1) 400.130  
 Original Points Count: (f1) 32788  
 Actual Points Count: (f1) 32788  
 Acquisition Time (sec): (f1) 3.9846  
 Spectral Width (ppm): (f1) 20.553  
 Pulse Program: Unknown

<sup>13</sup>C NMR of **3l**

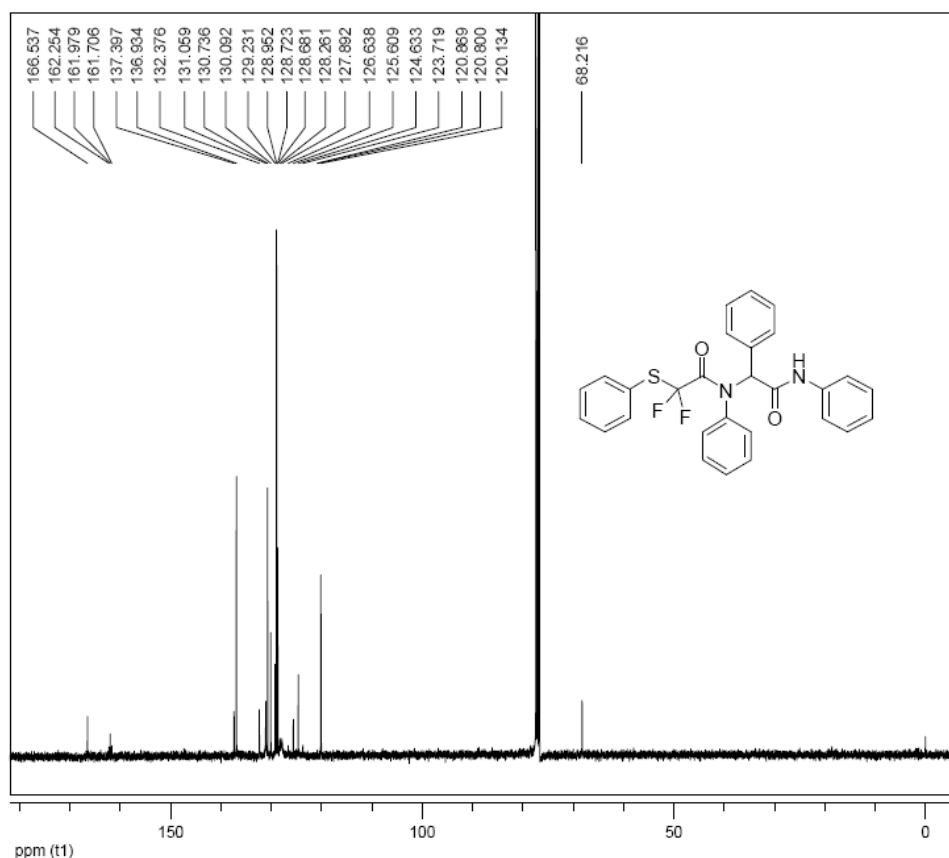

Date:  
5 Dec 2010  
Document's Title:  
LH02-m-C

Spectrum Title:  
None  
Frequency (MHz):  
(f1) 100.613  
Original Points Count:  
(f1) 32768  
Actual Points Count:  
(f1) 32768  
Acquisition Time (sec):  
(f1) 1.3631  
Spectral Width (ppm):  
(f1) 236.921  
Pulse Program:  
Unknown

<sup>19</sup>F NMR of **3l**

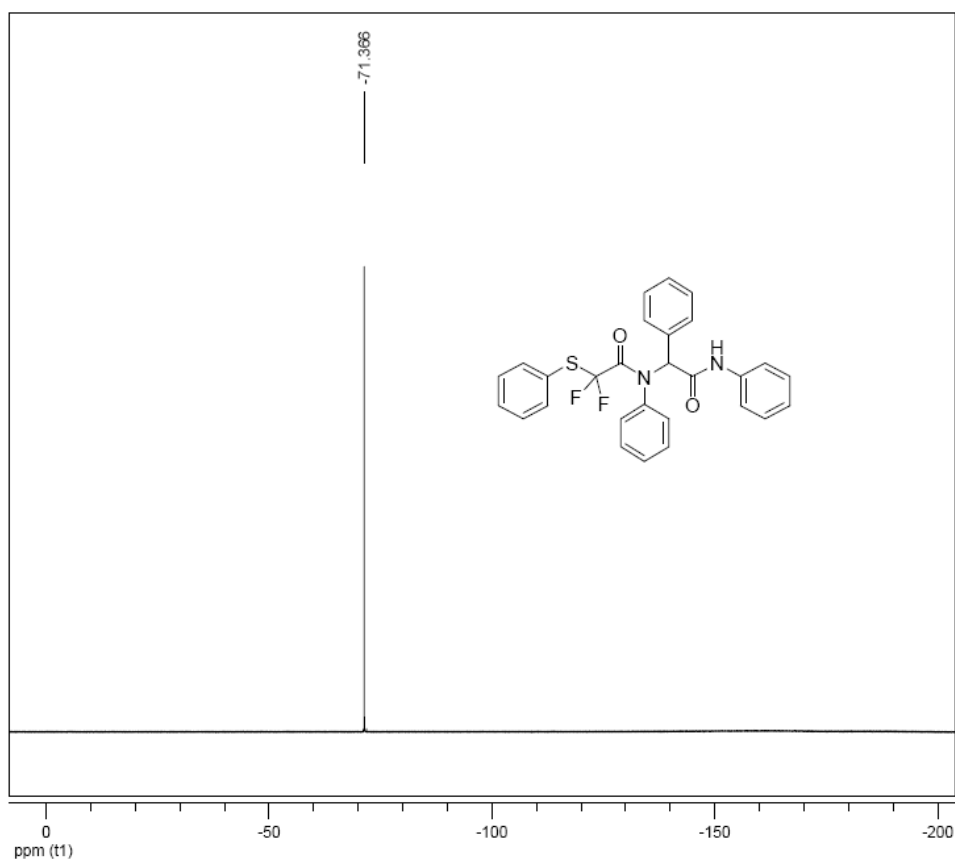

Date:  
5 Dec 2010  
Document's Title:  
LH02-m-F

Spectrum Title:  
None  
Frequency (MHz):  
(f1) 376.498  
Original Points Count:  
(f1) 65536  
Actual Points Count:  
(f1) 65536  
Acquisition Time (sec):  
(f1) 0.7340  
Spectral Width (ppm):  
(f1) 237.148  
Pulse Program:  
Unknown

# <sup>1</sup>H NMR of **3m**

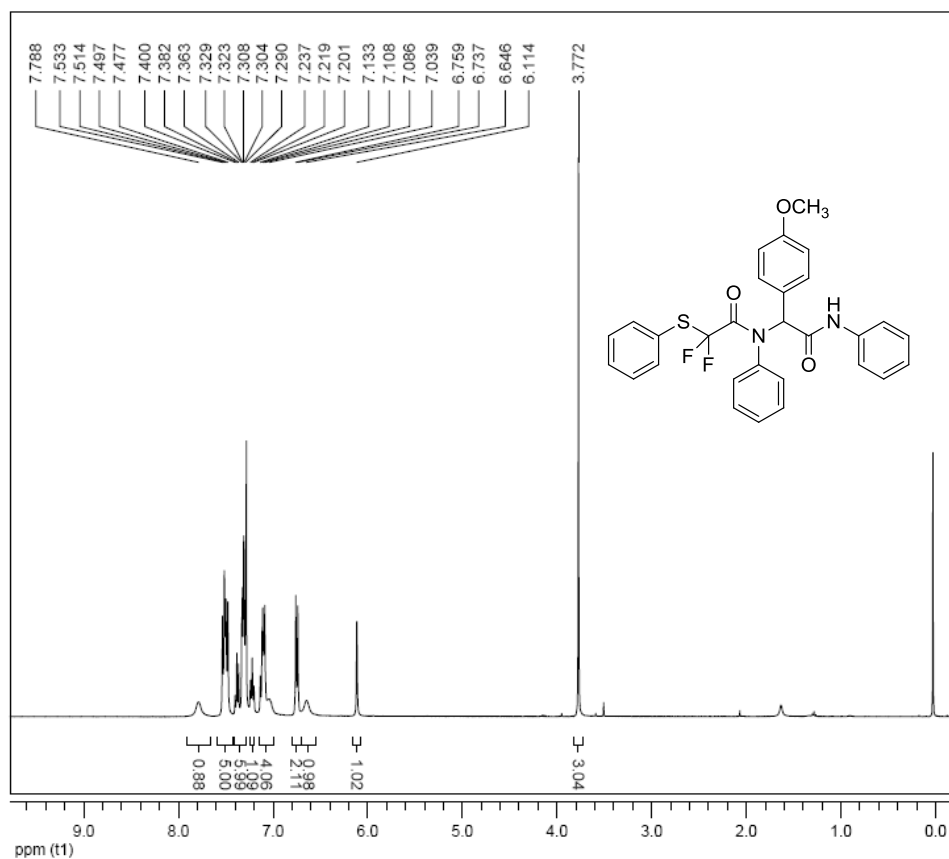

Date:  
10 Nov 2010  
Document's Title:  
LH02-n-H

Spectrum Title:  
None  
Frequency (MHz):  
(f1) 400.130  
Original Points Count:  
(f1) 32768  
Actual Points Count:  
(f1) 32768  
Acquisition Time (sec):  
(f1) 3.9846  
Spectral Width (ppm):  
(f1) 20.553  
Pulse Program:  
Unknown

# <sup>13</sup>C NMR of **3m**

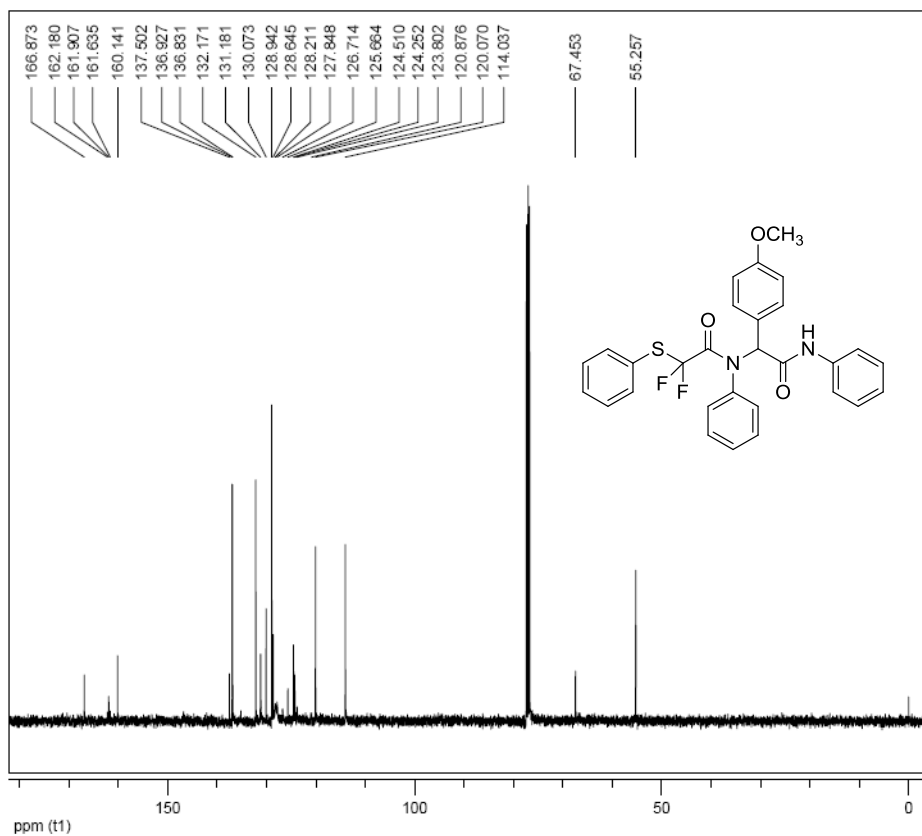

Date:  
5 Dec 2010  
Document's Title:  
LH02-n-C

Spectrum Title:  
None  
Frequency (MHz):  
(f1) 100.613  
Original Points Count:  
(f1) 32768  
Actual Points Count:  
(f1) 32768  
Acquisition Time (sec):  
(f1) 1.3631  
Spectral Width (ppm):  
(f1) 238.921  
Pulse Program:  
Unknown

$^{19}\text{F}$  NMR of **3m**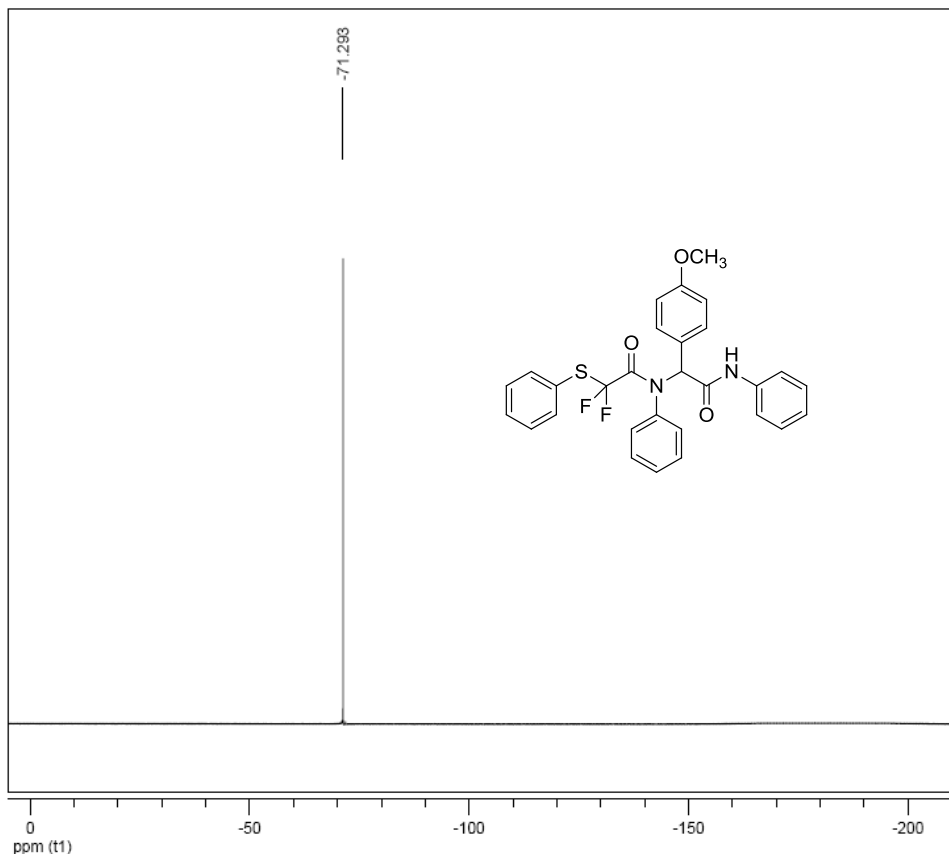

Date:  
5 Dec 2010  
Document's Title:  
LH02-n-F

Spectrum Title:  
None

Frequency (MHz):

Frequency (MHz):  
(f1) 376.498

(f1) 65536

(f1) 65536  
Actual Points Count:  
(f1) 65536

Acquisition Time (sec):  
(f1) 0.7340

Spectral Width (ppm):  
(f1) 237.148

**Pulse Program:**  
Unknown

<sup>1</sup>H NMR of **4a**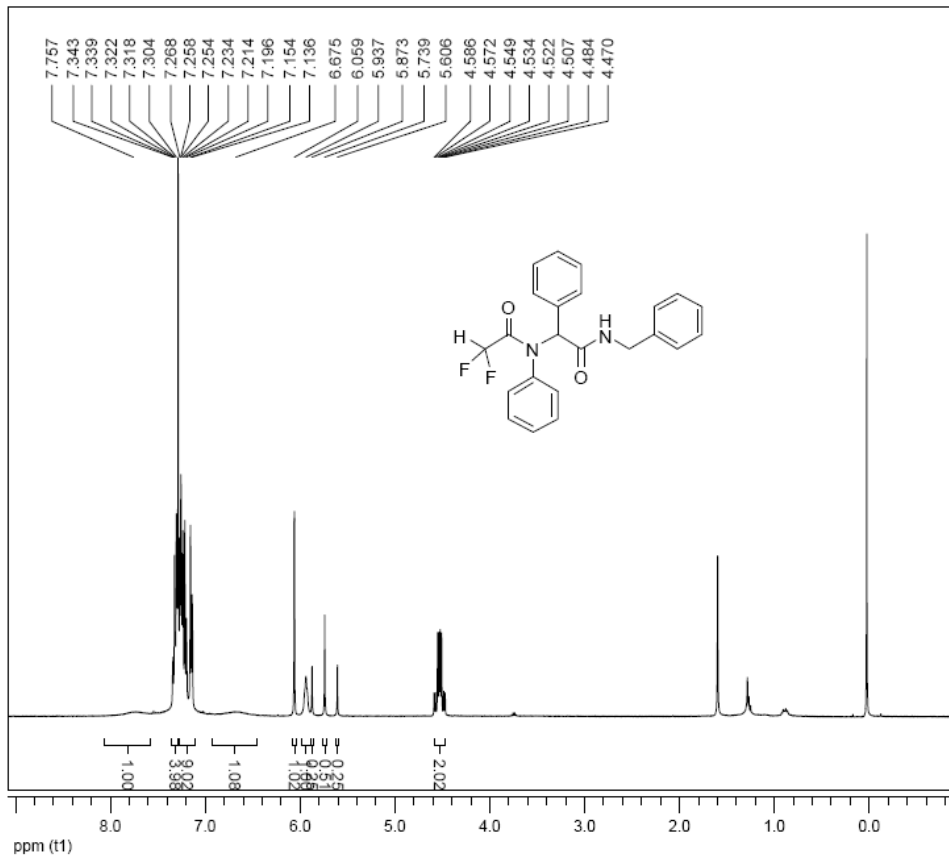

Date: \_\_\_\_\_

9 Dec 2010

Document's Title:  
LH02-1-H

**Spectrum Title:**

None

Frequency (MHz):  
(f1) 400.130

Original Points Count:  
(f1) 32768

(f1) 32768  
Actual Points Count:  
(f1) 32768

Acquisition Time (sec):  
(f1) 3.9848

Spectral Width (ppm):  
(f1) 20.553

**Pulse Program:**  
Unknown

<sup>13</sup>C NMR of **4a**

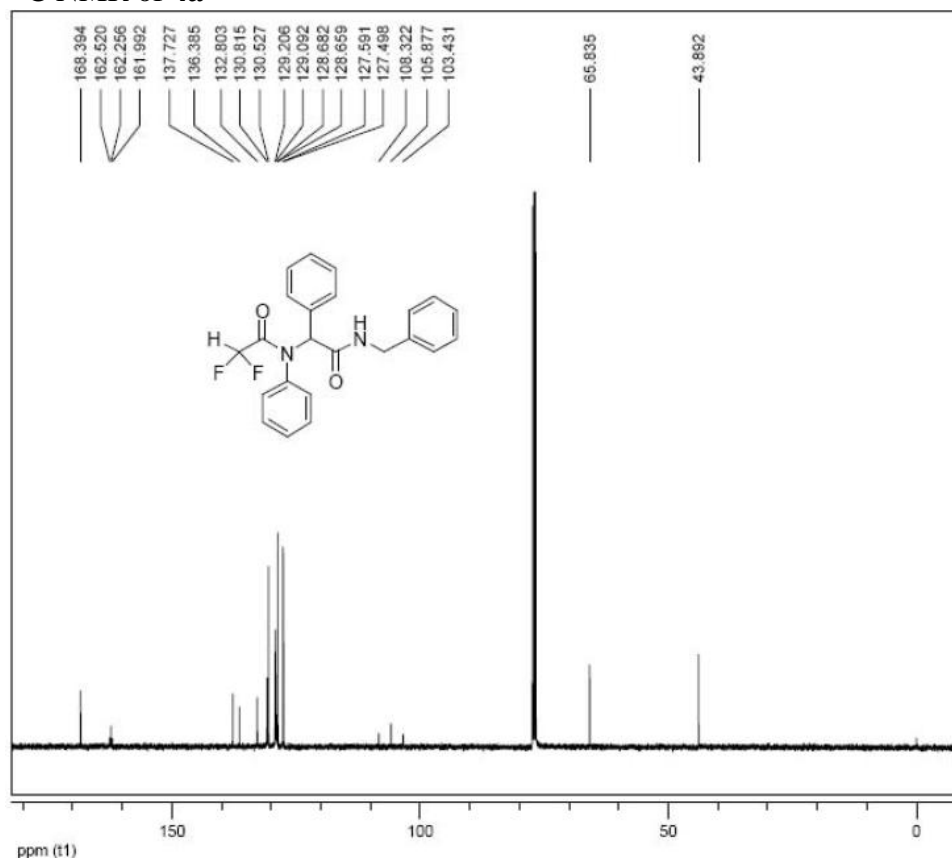

Date:  
21 Oct 2009  
Document's Title:  
T-C

Spectrum Title:  
None  
Frequency (MHz):  
(f1) 100.613  
Original Points Count:  
(f1) 32768  
Actual Points Count:  
(f1) 32768  
Acquisition Time (sec):  
(f1) 1.3631  
Spectral Width (ppm):  
(f1) 238.921  
Pulse Program:  
Unknown

<sup>19</sup>F NMR of **4a**

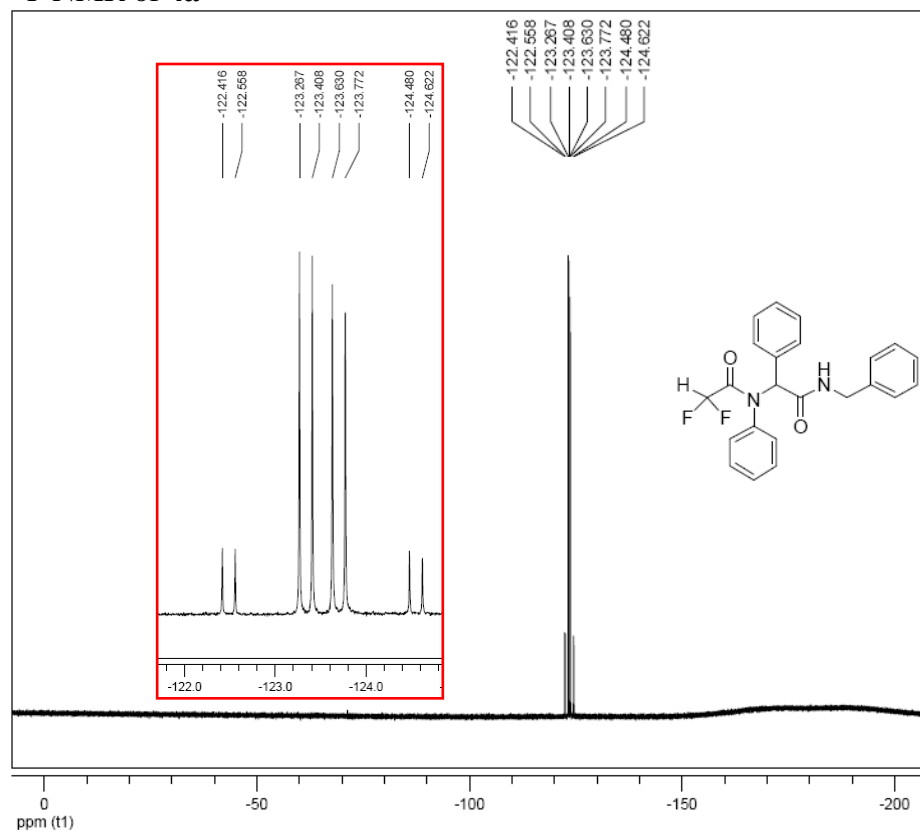

Date:  
16 Dec 2010  
Document's Title:  
LH02-1-F

Spectrum Title:  
None  
Frequency (MHz):  
(f1) 376.498  
Original Points Count:  
(f1) 65538  
Actual Points Count:  
(f1) 65538  
Acquisition Time (sec):  
(f1) 0.7340  
Spectral Width (ppm):  
(f1) 237.148  
Pulse Program:  
Unknown

# MS (ESI) of **4a**

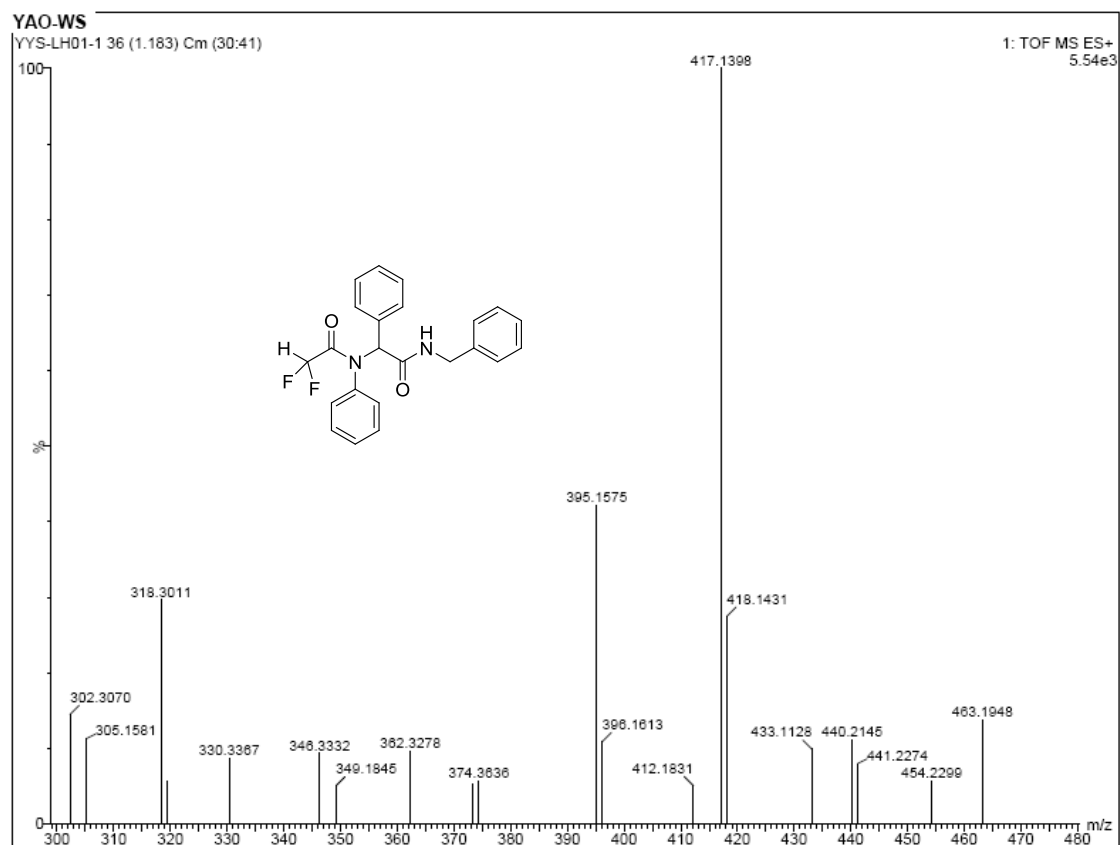

# <sup>1</sup>H NMR of **4b**

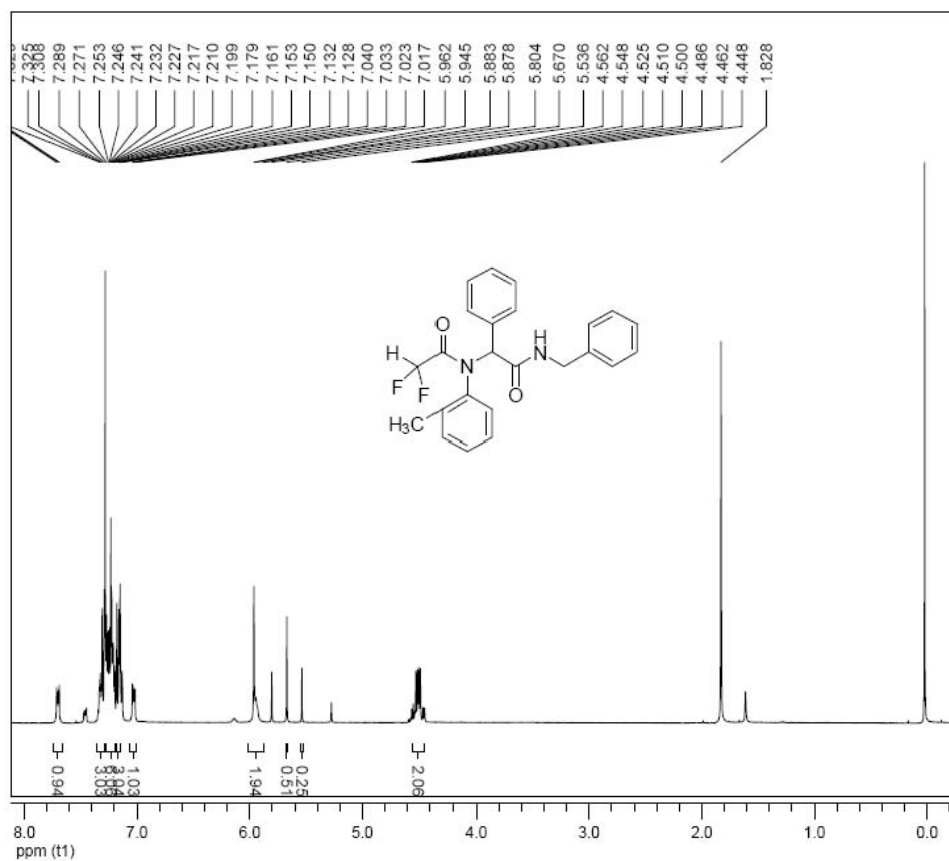

<sup>13</sup>C NMR of **4b**

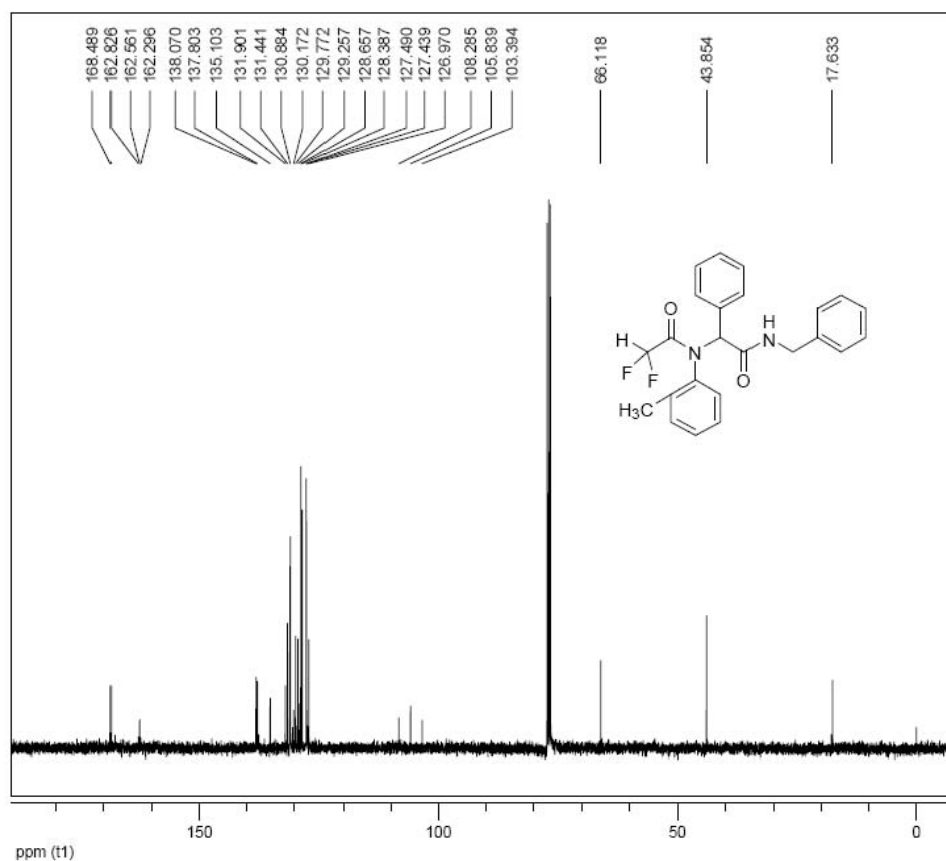

Date:  
5 Dec 2010  
Document's Title:  
LH02-2-C

Spectrum Title:  
None  
Frequency (MHz):  
(f1) 100.613  
Original Points Count:  
(f1) 32788  
Actual Points Count:  
(f1) 32788  
Acquisition Time (sec):  
(f1) 1.3831  
Spectral Width (ppm):  
(f1) 238.921  
Pulse Program:  
Unknown

<sup>19</sup>F NMR of **4b**

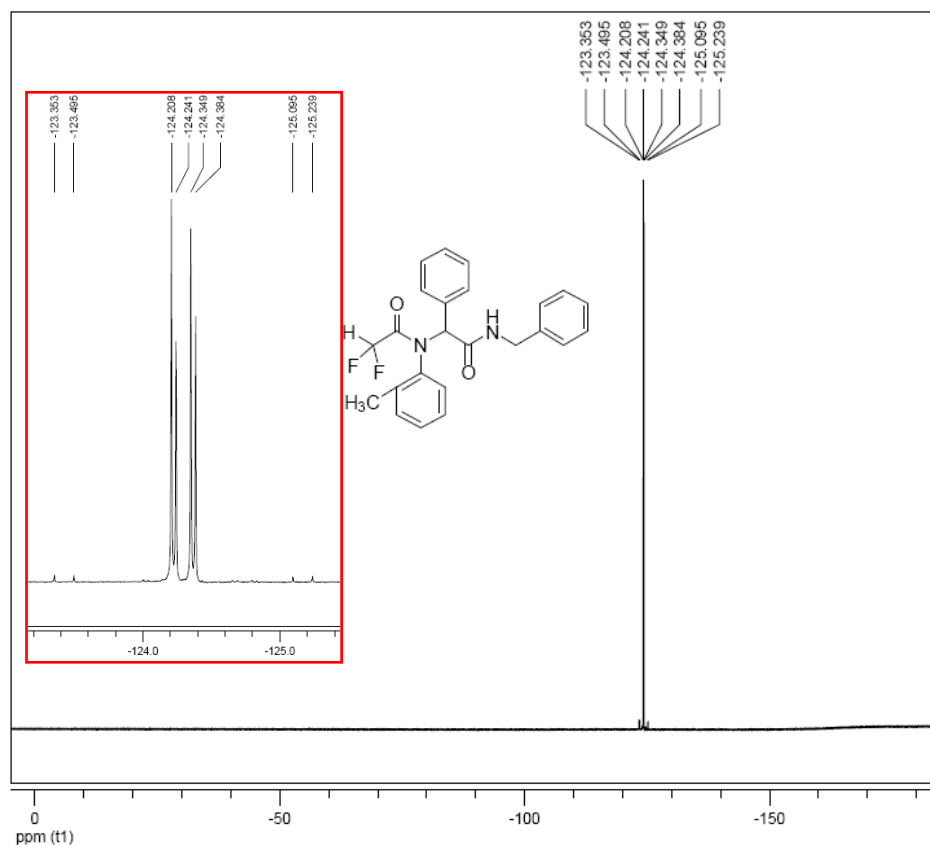

Date:  
5 Dec 2010  
Document's Title:  
LH02-2-F

Spectrum Title:  
None  
Frequency (MHz):  
(f1) 376.498  
Original Points Count:  
(f1) 65536  
Actual Points Count:  
(f1) 65536  
Acquisition Time (sec):  
(f1) 0.7340  
Spectral Width (ppm):  
(f1) 237.148  
Pulse Program:  
Unknown

# MS (ESI) of **4b**

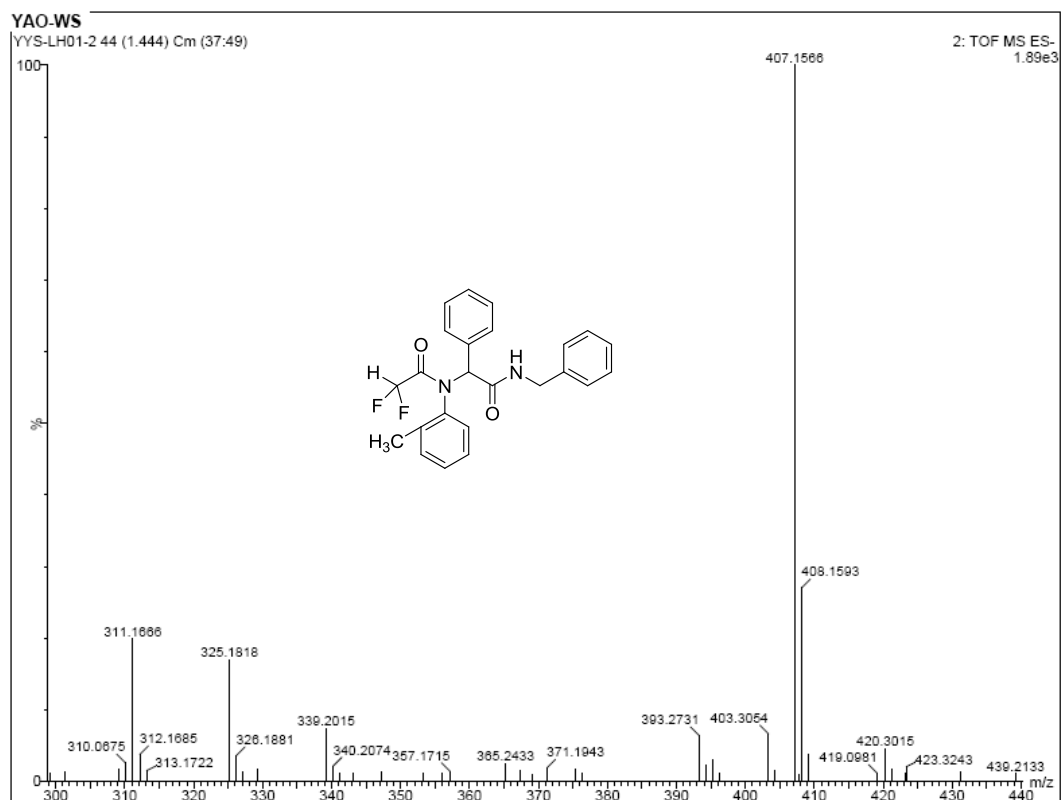

# <sup>1</sup>H NMR of **4c**

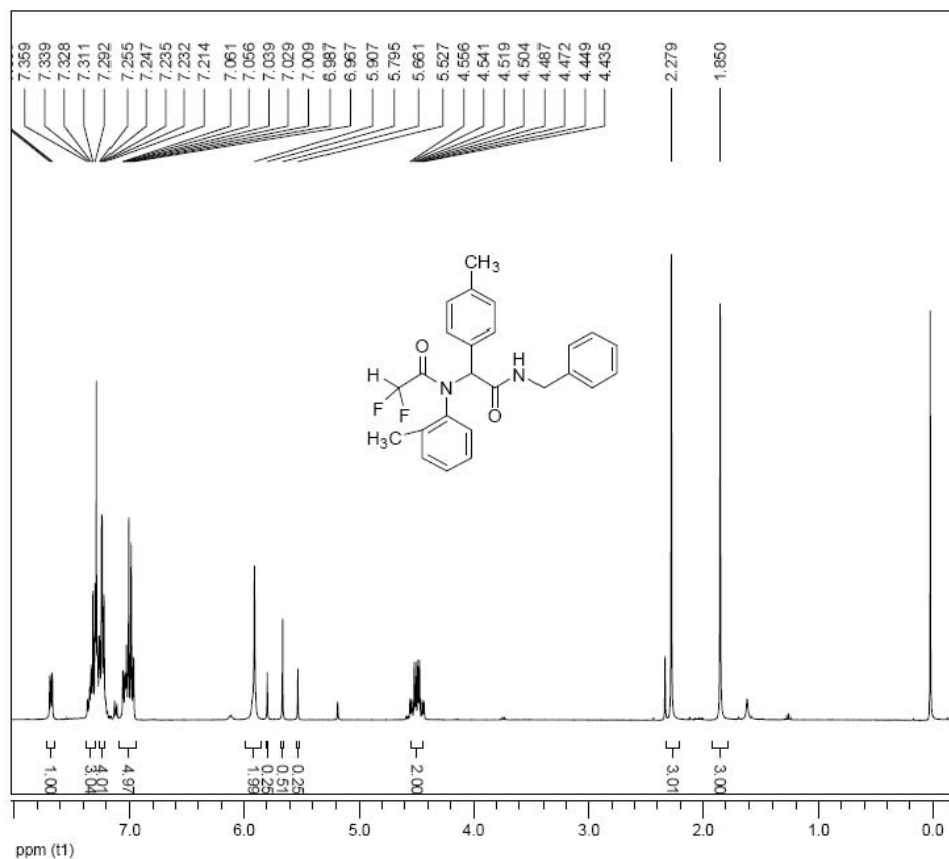

Date:  
5 Dec 2010  
Document's Title:  
LH02-3-H

Spectrum Title:  
None  
Frequency (MHz):  
(f1) 400.130  
Original Points Count:  
(f1) 32768  
Actual Points Count:  
(f1) 32768  
Acquisition Time (sec):  
(f1) 3.9845  
Spectral Width (ppm):  
(f1) 20.563  
Pulse Program:  
Unknown

### $^{13}\text{C}$ NMR of **4c**

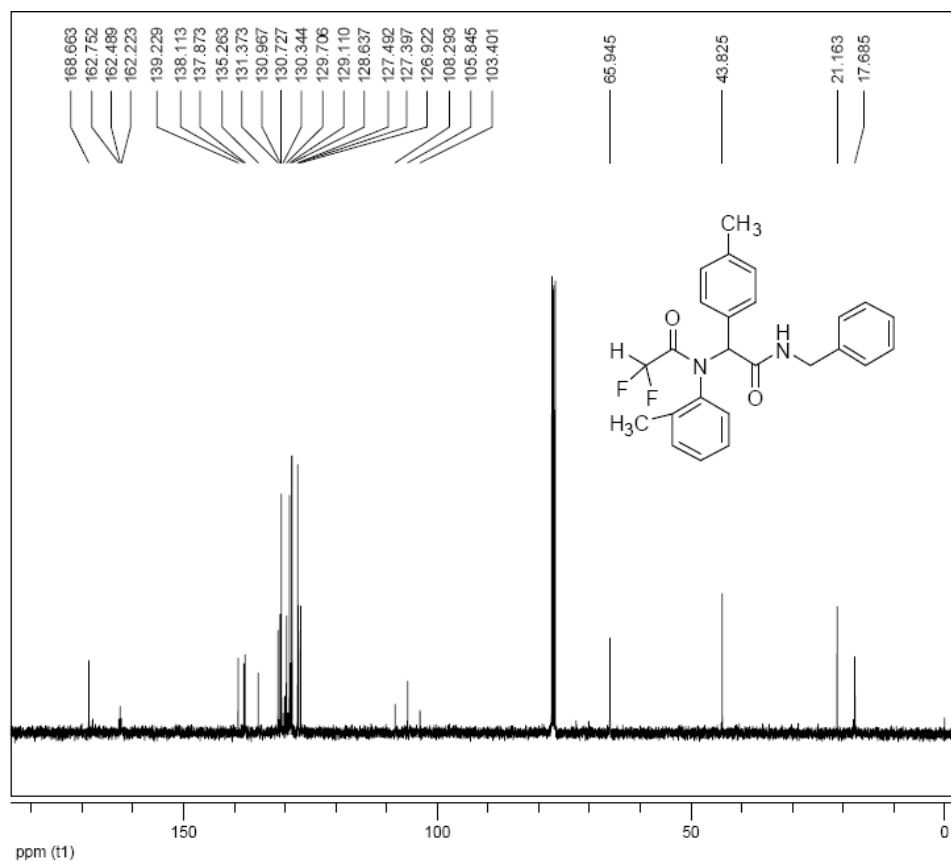

Date:  
5 Dec 2010  
Document's Title:  
LH02-3-C

Spectrum Title:  
None  
Frequency (MHz):  
(f1) 100.613  
Original Points Count:  
(f1) 32788  
Actual Points Count:  
(f1) 32788  
Acquisition Time (sec):  
(f1) 1.3831  
Spectral Width (ppm):  
(f1) 238.921  
Pulse Program:  
Unknown

### $^{19}\text{F}$ NMR of **4c**

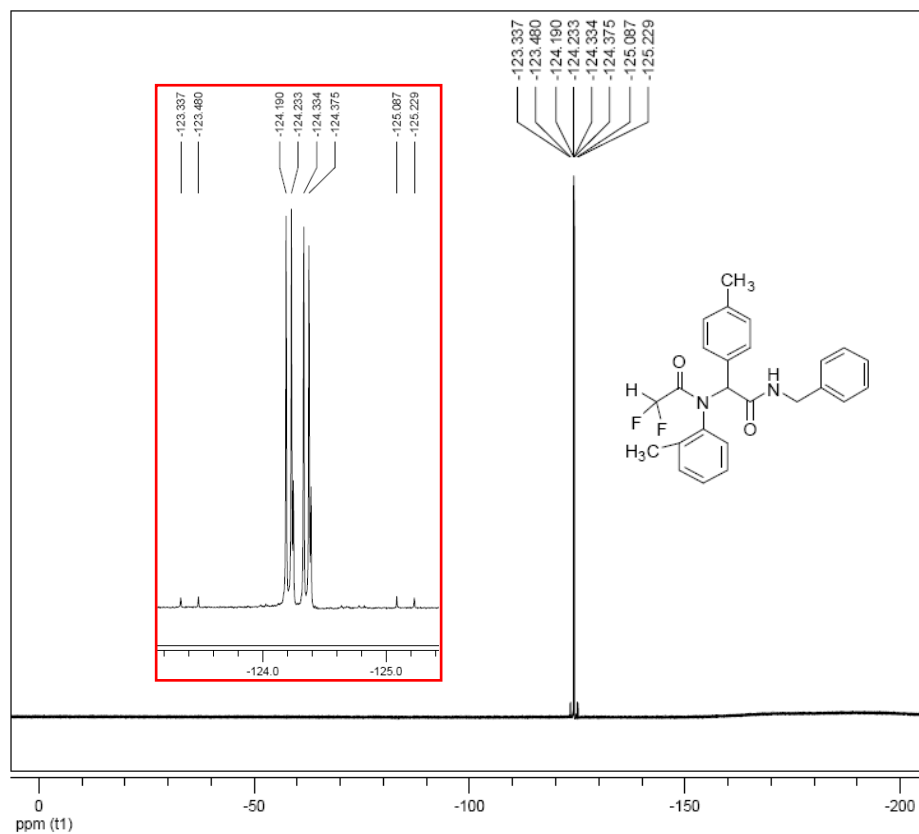

Date:  
5 Dec 2010  
Document's Title:  
LH02-3-F

Spectrum Title:  
None  
Frequency (MHz):  
(f1) 376.498  
Original Points Count:  
(f1) 65536  
Actual Points Count:  
(f1) 65536  
Acquisition Time (sec):  
(f1) 0.7340  
Spectral Width (ppm):  
(f1) 237.148  
Pulse Program:  
Unknown

# MS (ESI) of **4c**

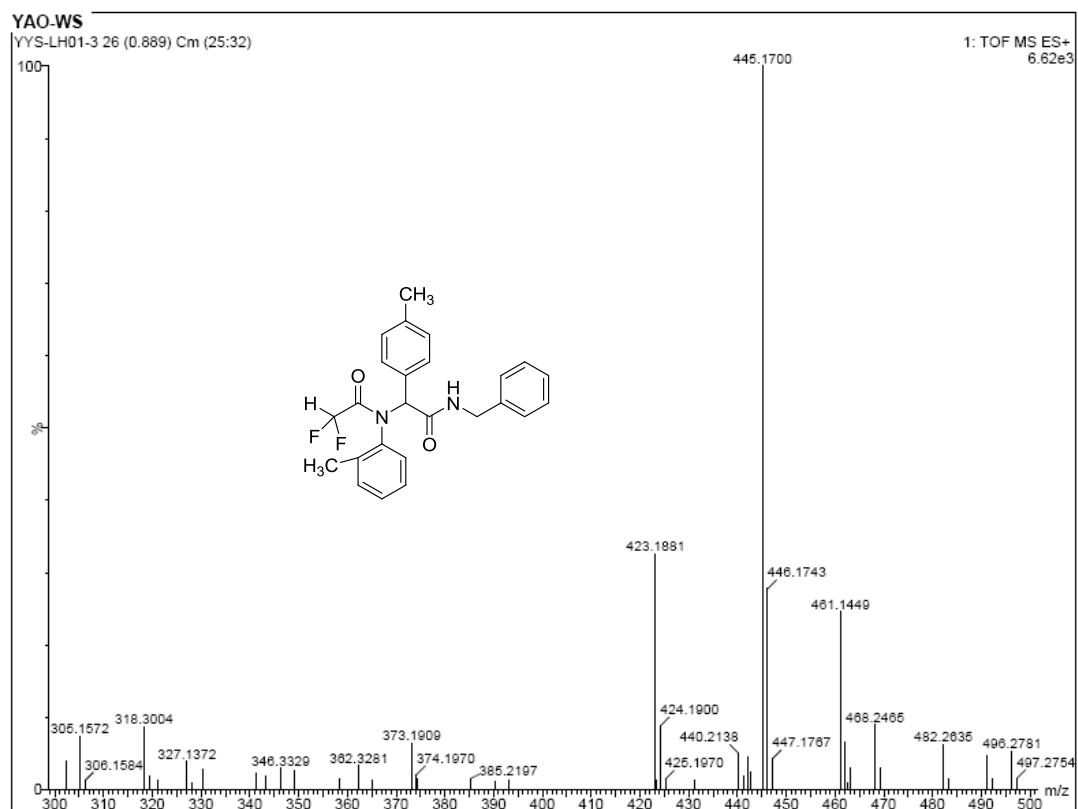

# <sup>1</sup>H NMR of **4d**

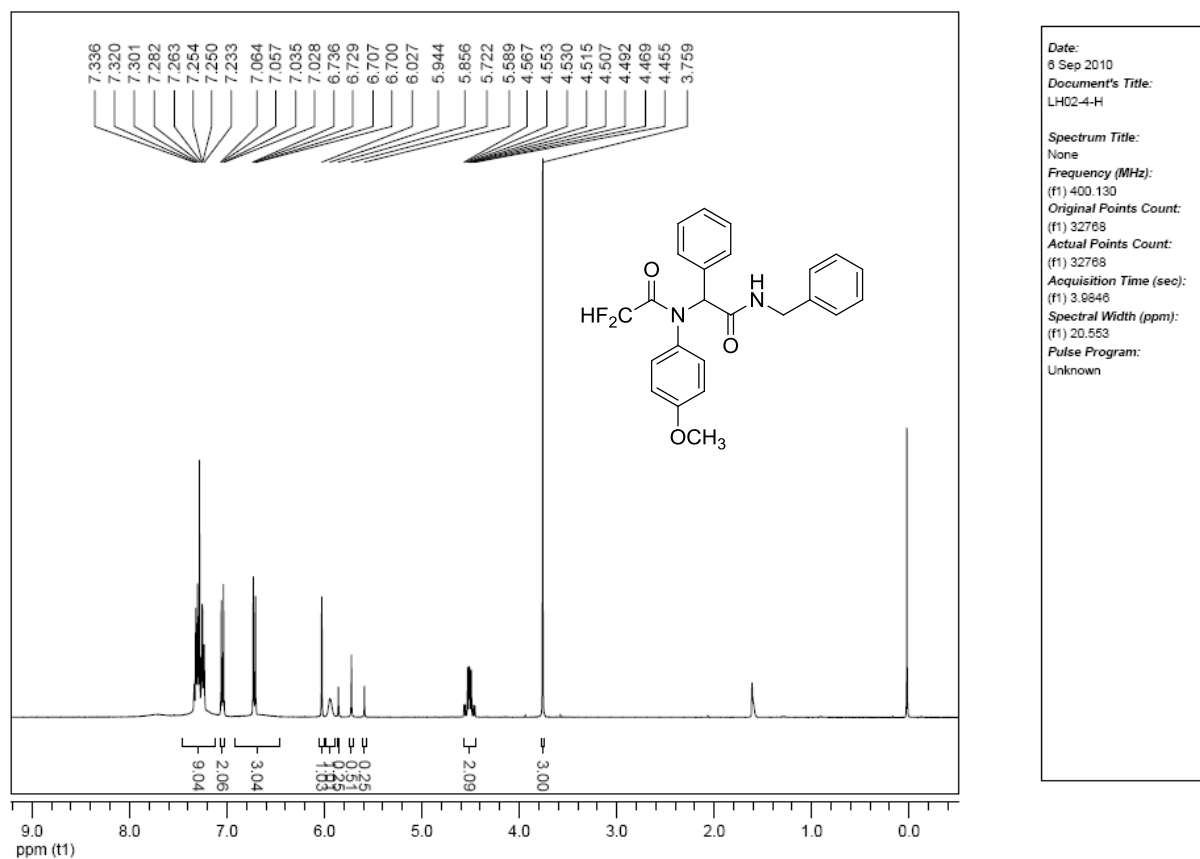

### <sup>13</sup>C NMR of **4d**

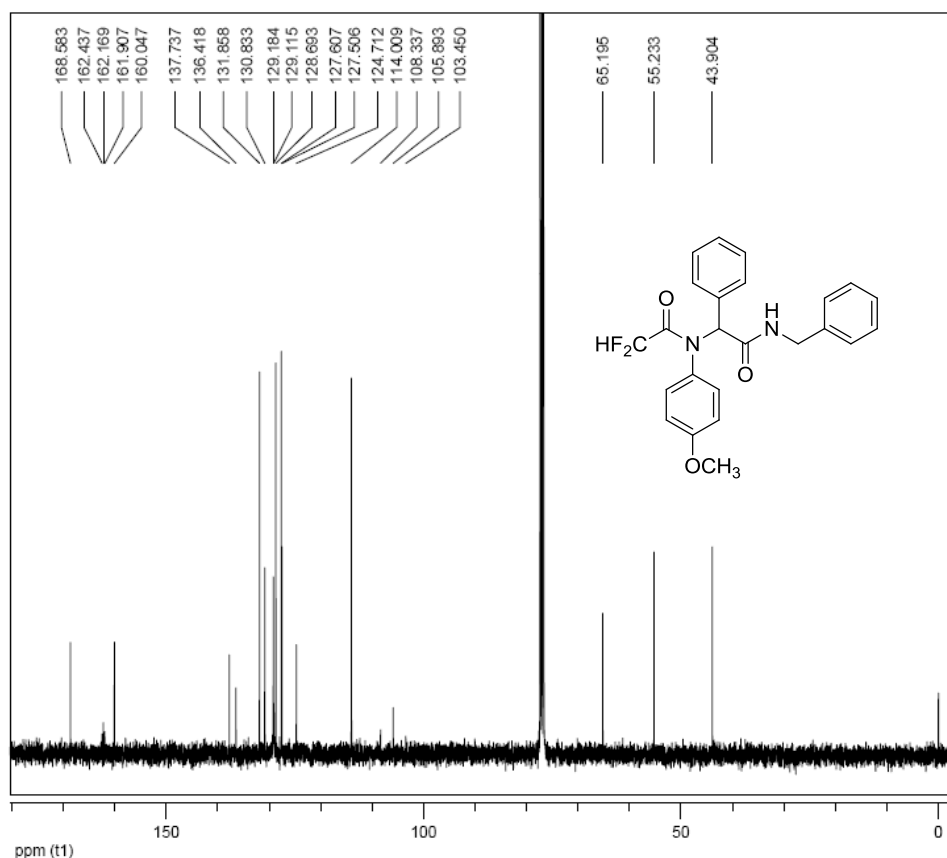

Date:  
13 Sep 2010  
Document's Title:  
LH02-4-C

Spectrum Title:  
None  
Frequency (MHz):  
(f1) 100.613  
Original Points Count:  
(f1) 32768  
Actual Points Count:  
(f1) 32768  
Acquisition Time (sec):  
(f1) 1.3631  
Spectral Width (ppm):  
(f1) 236.921  
Pulse Program:  
Unknown

### <sup>19</sup>F NMR of **4d**

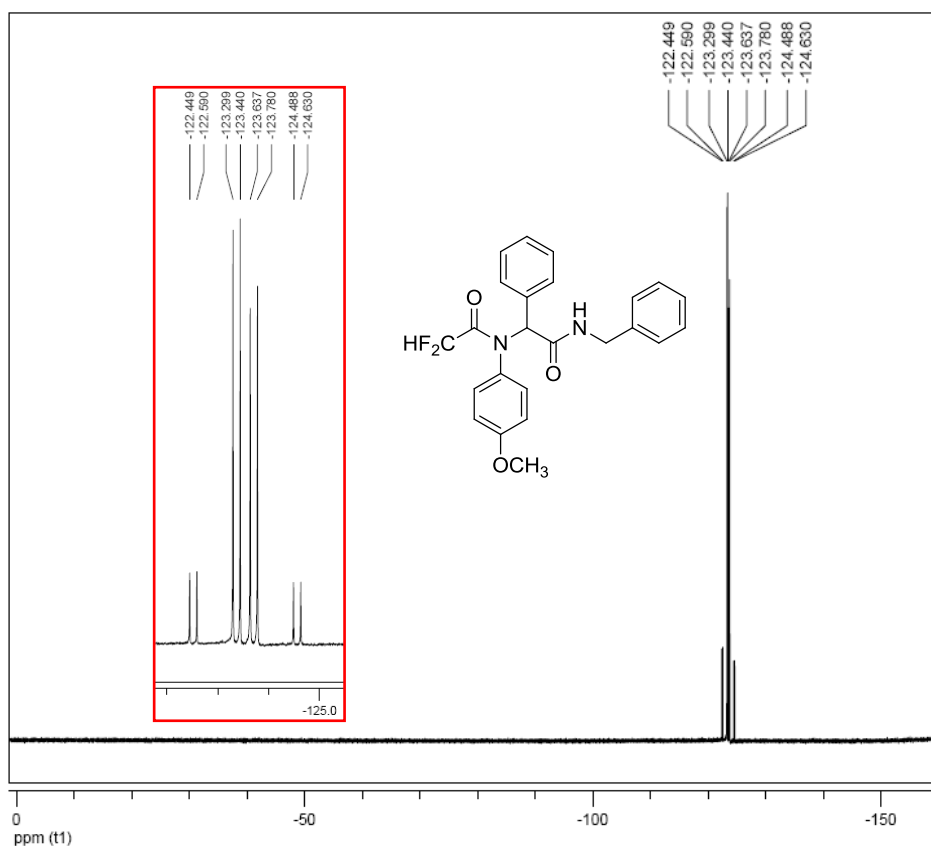

Date:  
8 Sep 2010  
Document's Title:  
LH02-4-F

Spectrum Title:  
None  
Frequency (MHz):  
(f1) 376.498  
Original Points Count:  
(f1) 65536  
Actual Points Count:  
(f1) 65536  
Acquisition Time (sec):  
(f1) 0.7340  
Spectral Width (ppm):  
(f1) 237.148  
Pulse Program:  
Unknown

# MS (ESI) of 4d

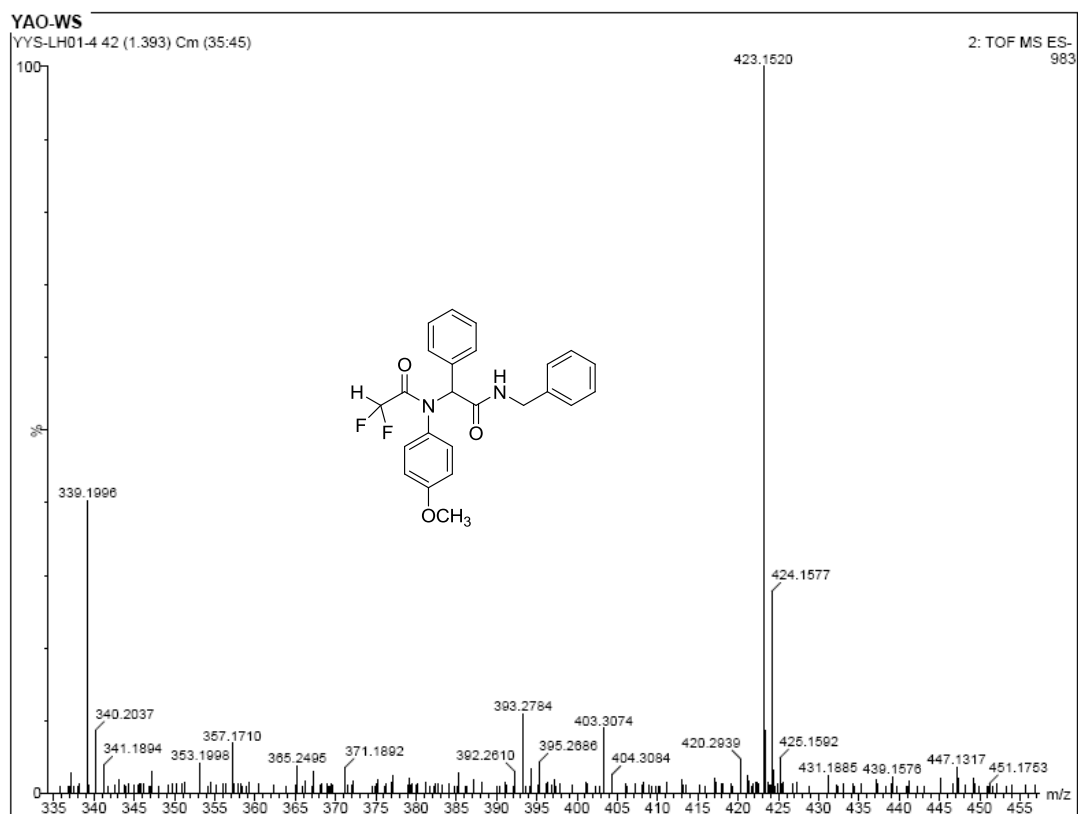

# <sup>1</sup>H NMR of 4e

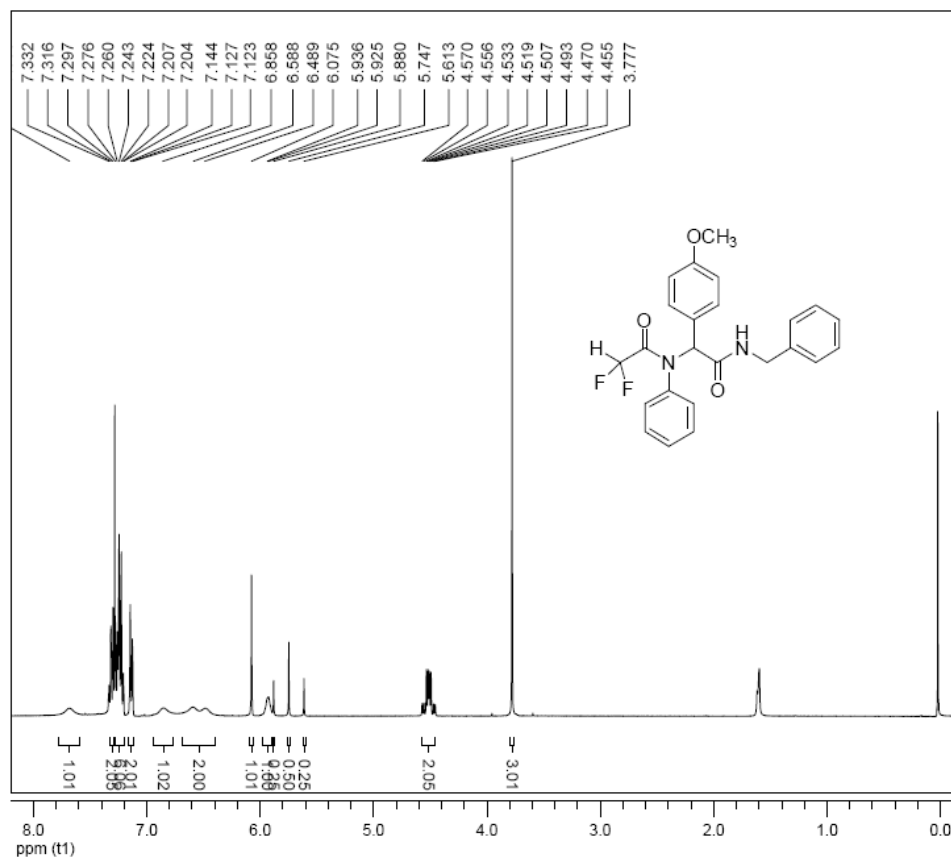

Date:  
26 Sep 2010  
Document's Title:  
LH02-6-H

Spectrum Title:  
None  
Frequency (MHz):  
(f1) 400.130  
Original Points Count:  
(f1) 32768  
Actual Points Count:  
(f1) 32768  
Acquisition Time (sec):  
(f1) 3.6846  
Spectral Width (ppm):  
(f1) 20.553  
Pulse Program:  
Unknown

<sup>13</sup>C NMR of **4e**

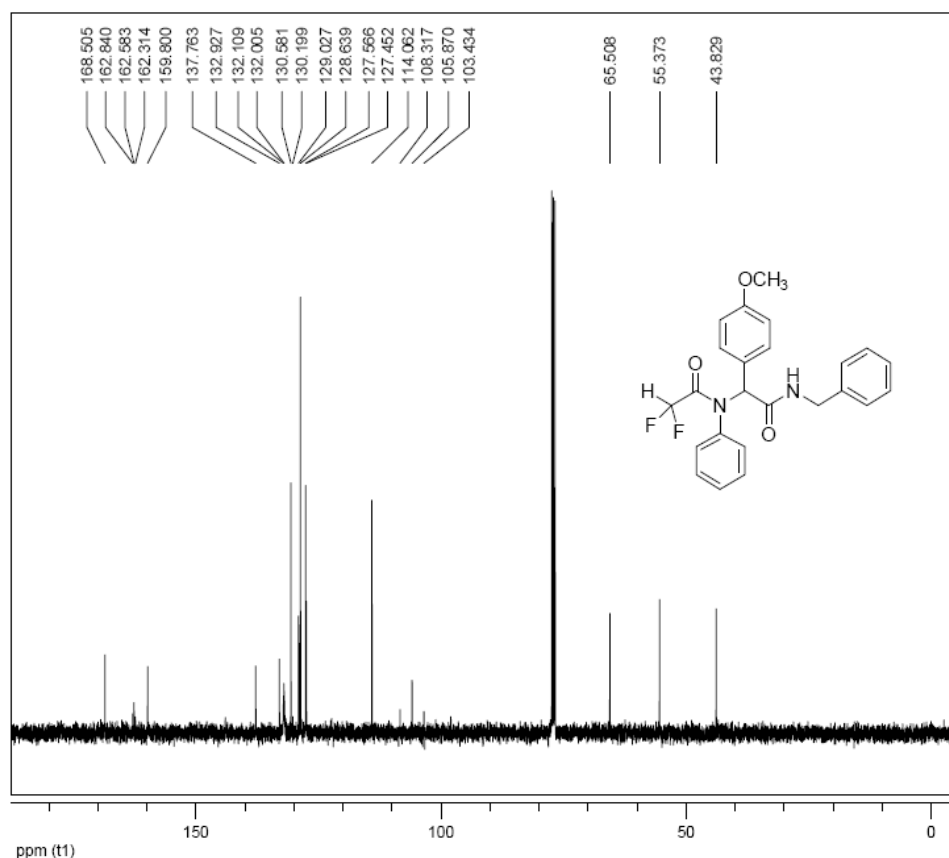

Date:  
25 Sep 2010  
Document's Title:  
LH02-S-C

Spectrum Title:  
None  
Frequency (MHz):  
(f1) 100.613  
Original Points Count:  
(f1) 32768  
Actual Points Count:  
(f1) 32768  
Acquisition Time (sec):  
(f1) 1.3631  
Spectral Width (ppm):  
(f1) 238.921  
Pulse Program:  
Unknown

<sup>19</sup>F NMR of **4e**

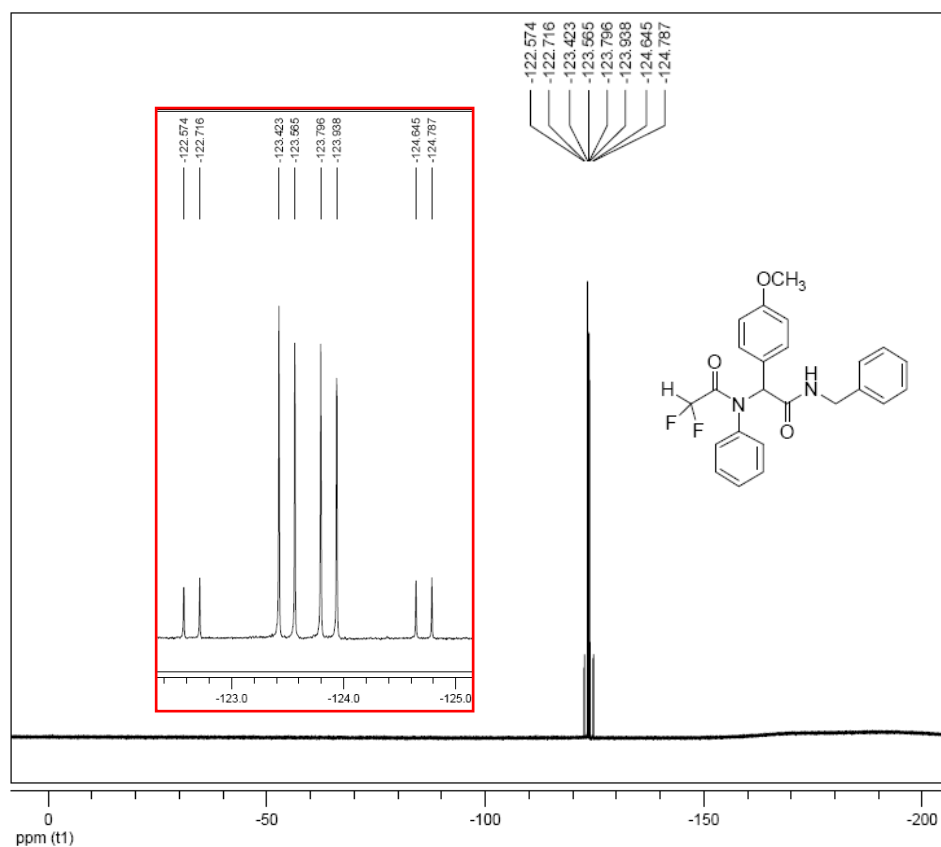

Date:  
25 Sep 2010  
Document's Title:  
LH02-S-F

Spectrum Title:  
None  
Frequency (MHz):  
(f1) 376.498  
Original Points Count:  
(f1) 65536  
Actual Points Count:  
(f1) 65536  
Acquisition Time (sec):  
(f1) 0.7340  
Spectral Width (ppm):  
(f1) 237.148  
Pulse Program:  
Unknown

# MS (ESI) of **4e**

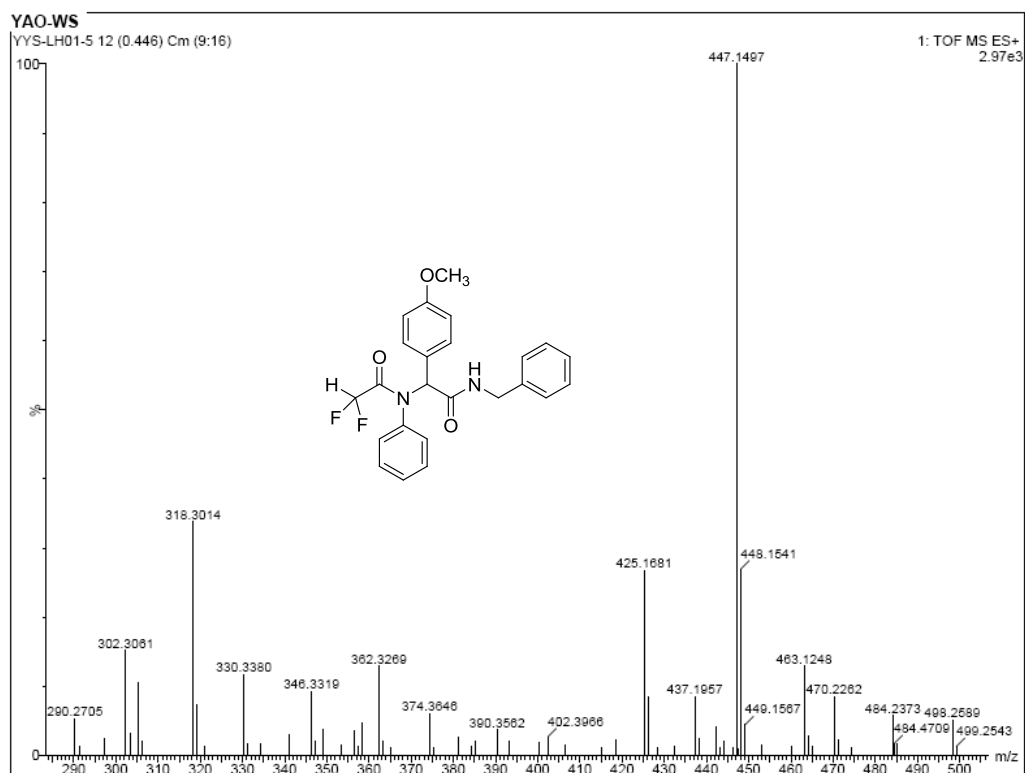

# <sup>1</sup>H NMR of **4f**

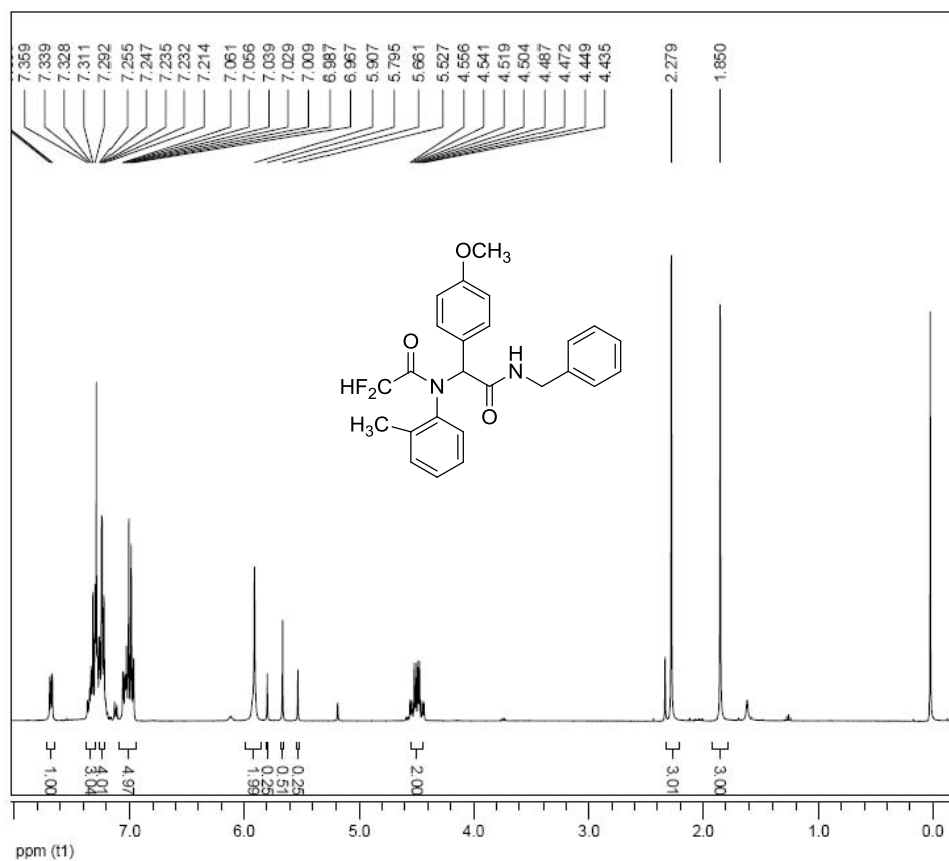

Date: 6 Dec 2010  
Document's Title: LH02-3-H  
Spectrum Title: None  
Frequency (MHz): (f1) 400.130  
Original Points Count: (f1) 32788  
Actual Points Count: (f1) 32788  
Acquisition Time (sec): (f1) 3.9846  
Spectral Width (ppm): (f1) 20.563  
Pulse Program: Unknown

### <sup>13</sup>C NMR of **4f**

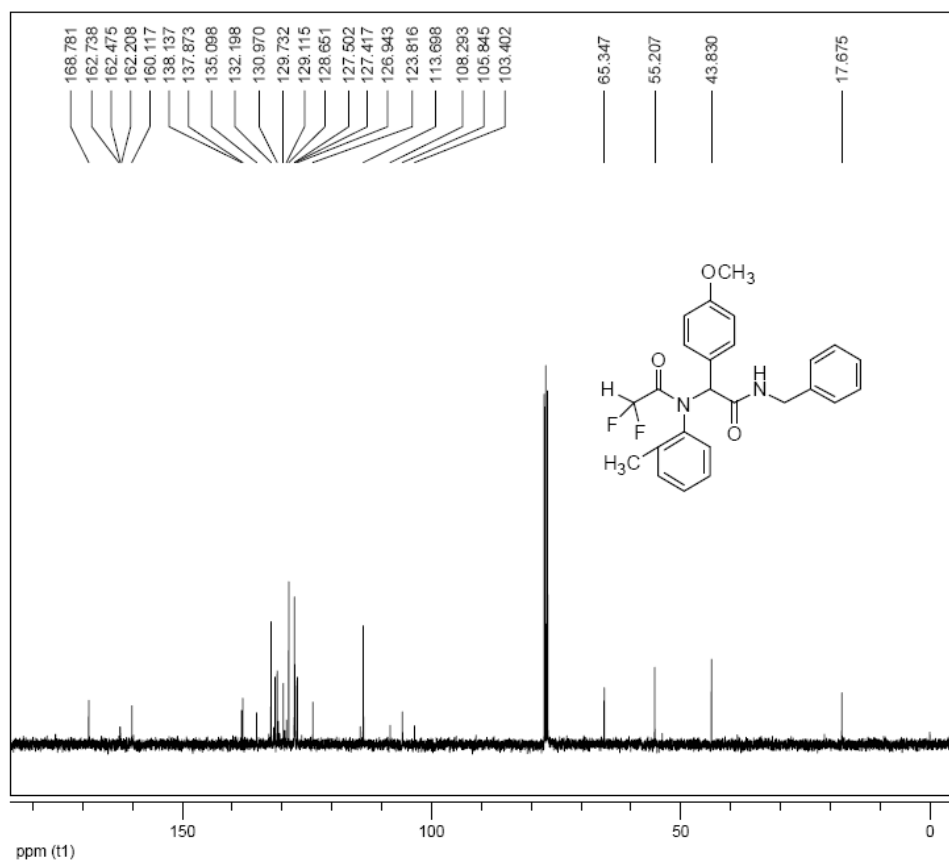

Date: 9 Dec 2010  
Document's Title: LH02-6-C  
Spectrum Title: None  
Frequency (MHz): (f1) 100.613  
Original Points Count: (f1) 32768  
Actual Points Count: (f1) 32768  
Acquisition Time (sec): (f1) 1.3631  
Spectral Width (ppm): (f1) 238.921  
Pulse Program: Unknown

### <sup>19</sup>F NMR of **4f**

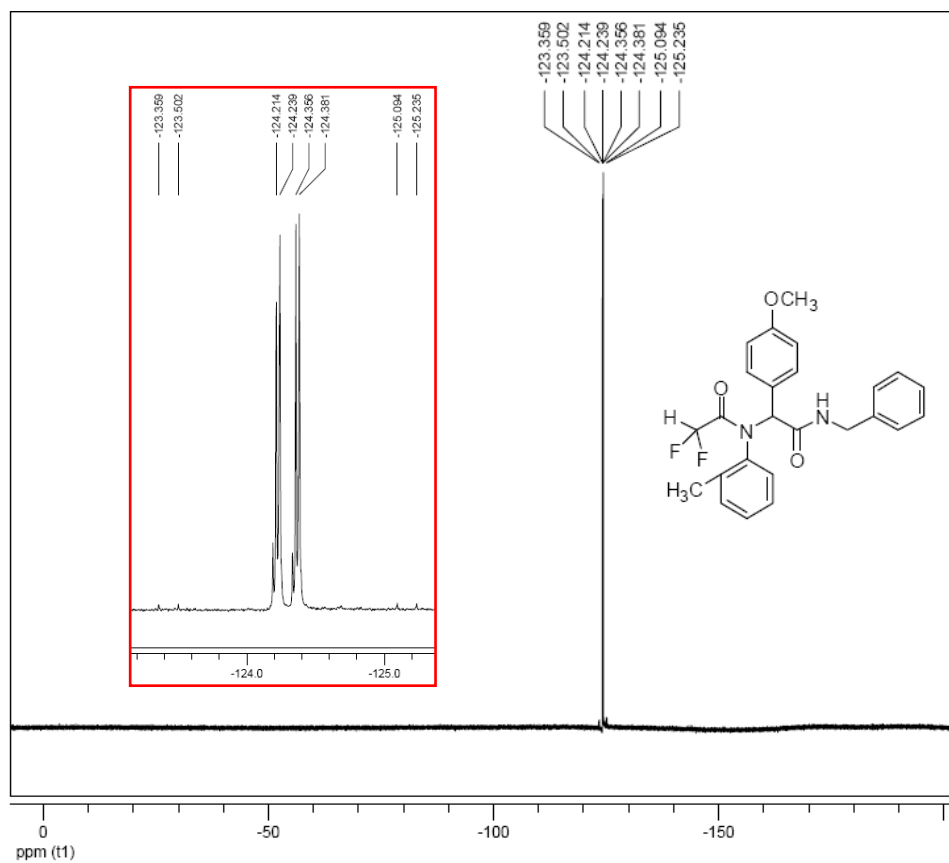

Date: 5 Dec 2010  
Document's Title: LH02-6-F  
Spectrum Title: None  
Frequency (MHz): (f1) 376.498  
Original Points Count: (f1) 65536  
Actual Points Count: (f1) 65536  
Acquisition Time (sec): (f1) 0.7340  
Spectral Width (ppm): (f1) 237.148  
Pulse Program: Unknown

<sup>1</sup>H NMR of **4g**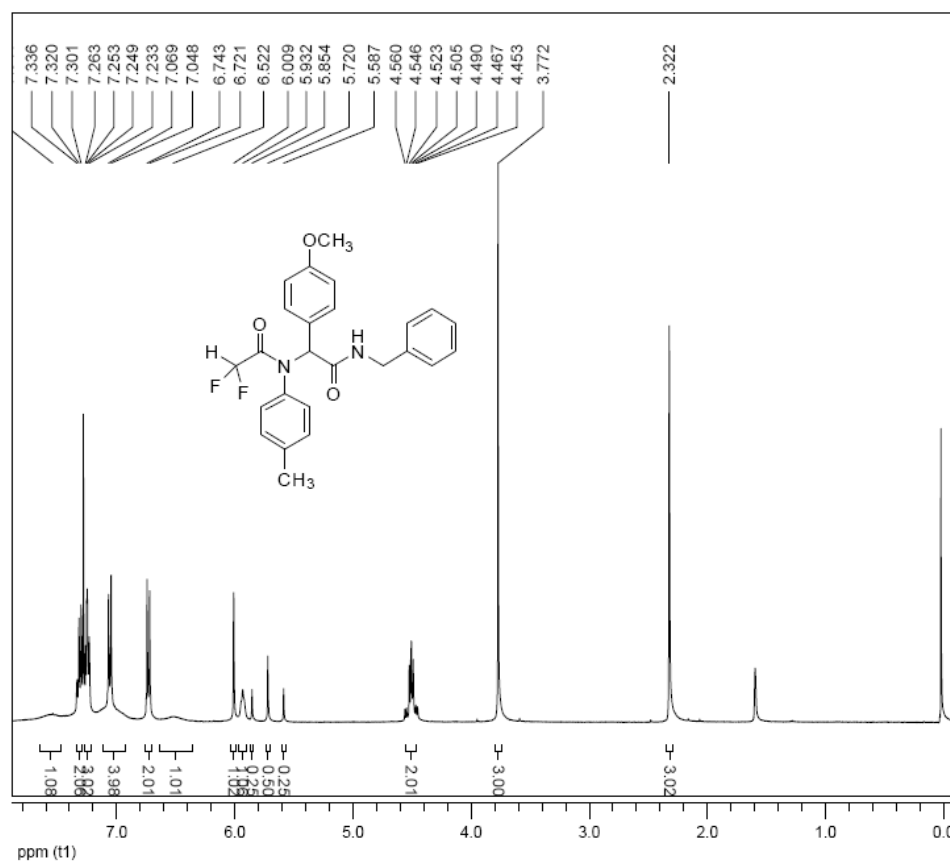

S40

# <sup>13</sup>C NMR of **4g**

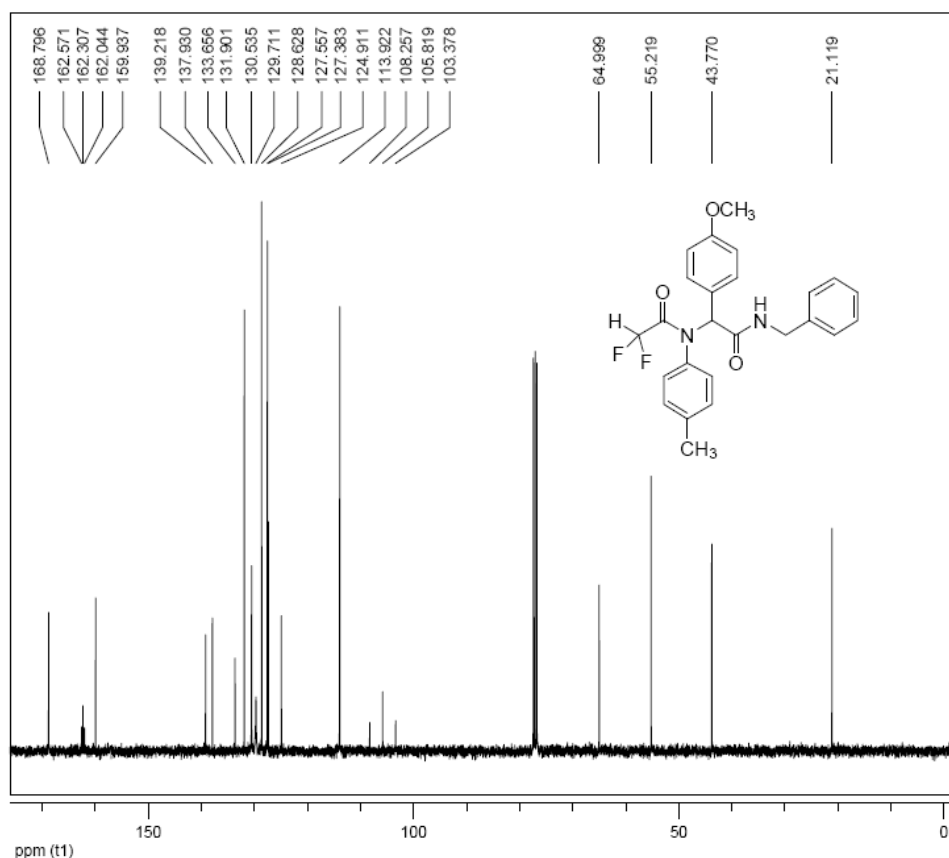

Date:  
28 Sep 2010  
Document's Title:  
LH02-7-C

Spectrum Title:  
None  
Frequency (MHz):  
(f1) 100.613  
Original Points Count:  
(f1) 32768  
Actual Points Count:  
(f1) 32768  
Acquisition Time (sec):  
(f1) 1.3631  
Spectral Width (ppm):  
(f1) 236.921  
Pulse Program:  
Unknown

# <sup>19</sup>F NMR of **4g**

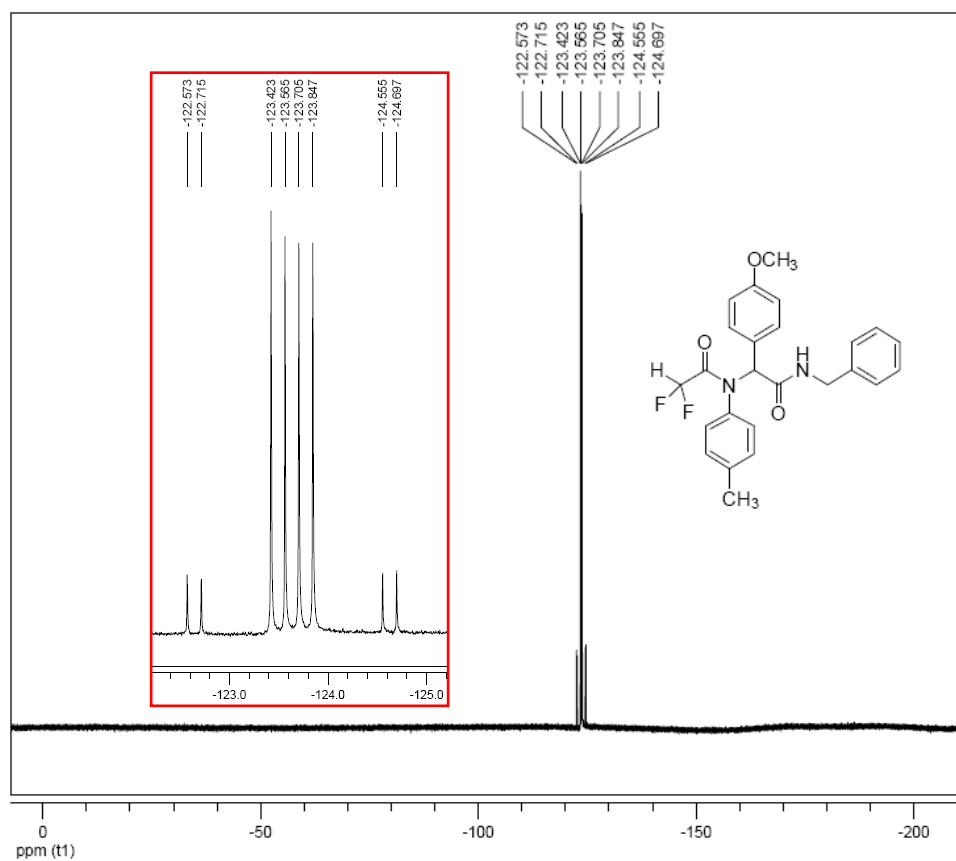

Date:  
24 Dec 2010  
Document's Title:  
LH02-7-F

Spectrum Title:  
None  
Frequency (MHz):  
(f1) 376.498  
Original Points Count:  
(f1) 65536  
Actual Points Count:  
(f1) 65536  
Acquisition Time (sec):  
(f1) 0.7340  
Spectral Width (ppm):  
(f1) 237.148  
Pulse Program:  
Unknown

# MS (ESI) of **4g**

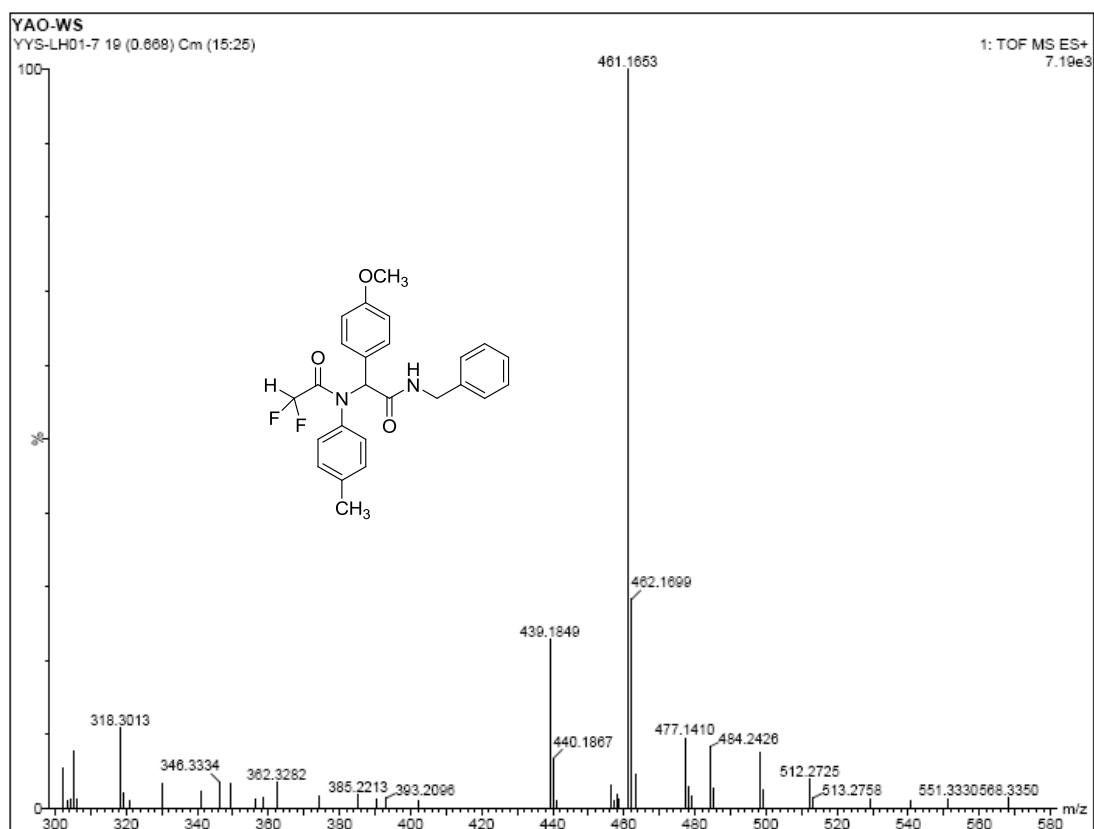

# <sup>1</sup>H NMR of **4h**

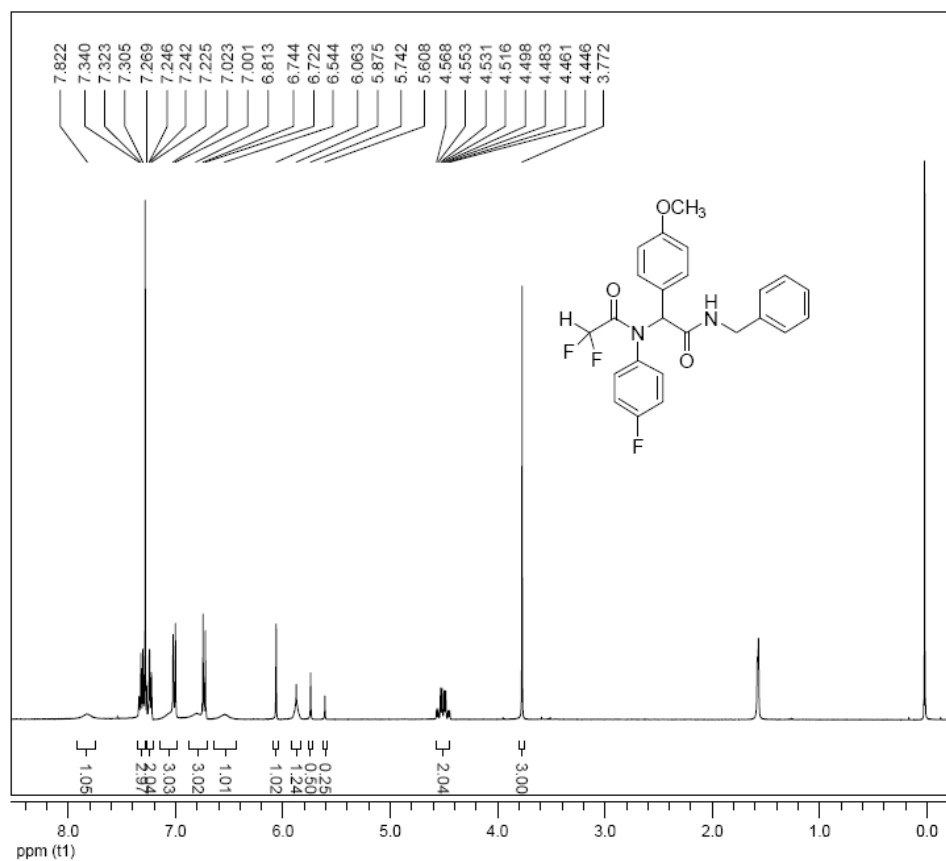

Date:  
9 Dec 2010  
Document's Title:  
LH02-9-H  
Spectrum Title:  
None  
Frequency (MHz):  
(f1) 400.130  
Original Points Count:  
(f1) 32768  
Actual Points Count:  
(f1) 32768  
Acquisition Time (sec):  
(f1) 3.9948  
Spectral Width (ppm):  
(f1) 20.553  
Pulse Program:  
Unknown

### $^{13}\text{C}$ NMR of **4h**

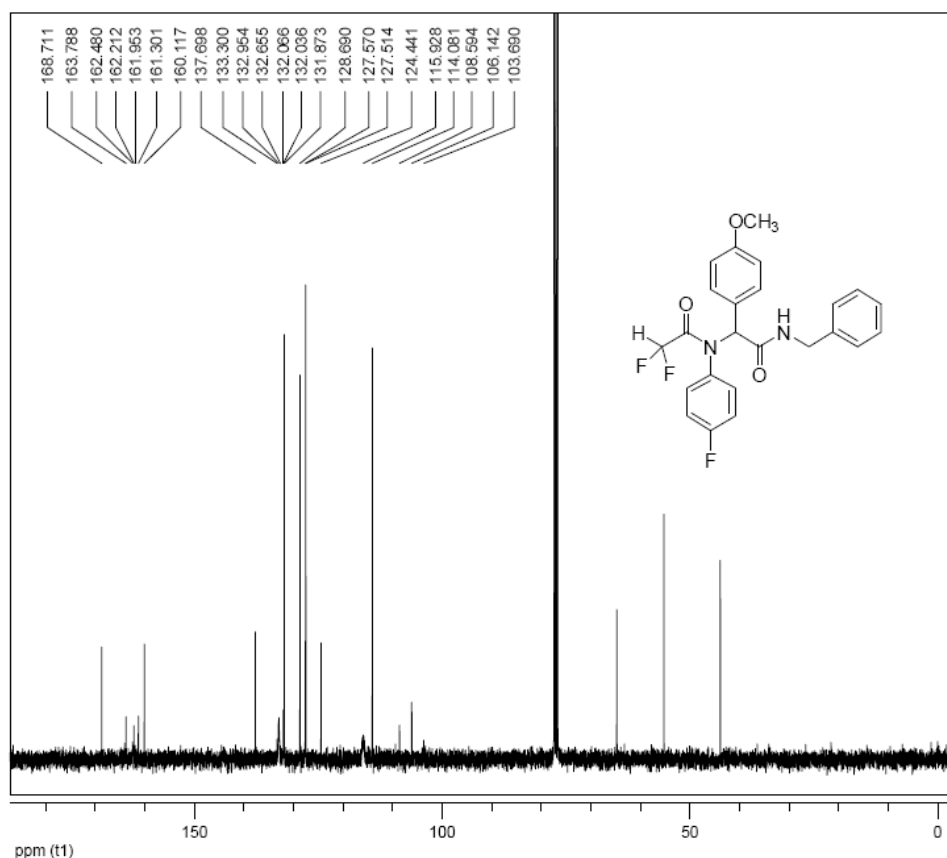

Date:  
27 Sep 2010  
Document's Title:  
LH02-8-C

Spectrum Title:  
None  
Frequency (MHz):  
(f1) 100.613  
Original Points Count:  
(f1) 32768  
Actual Points Count:  
(f1) 32768  
Acquisition Time (sec):  
(f1) 1.3631  
Spectral Width (ppm):  
(f1) 236.921  
Pulse Program:  
Unknown

### $^{19}\text{F}$ NMR of **4h**

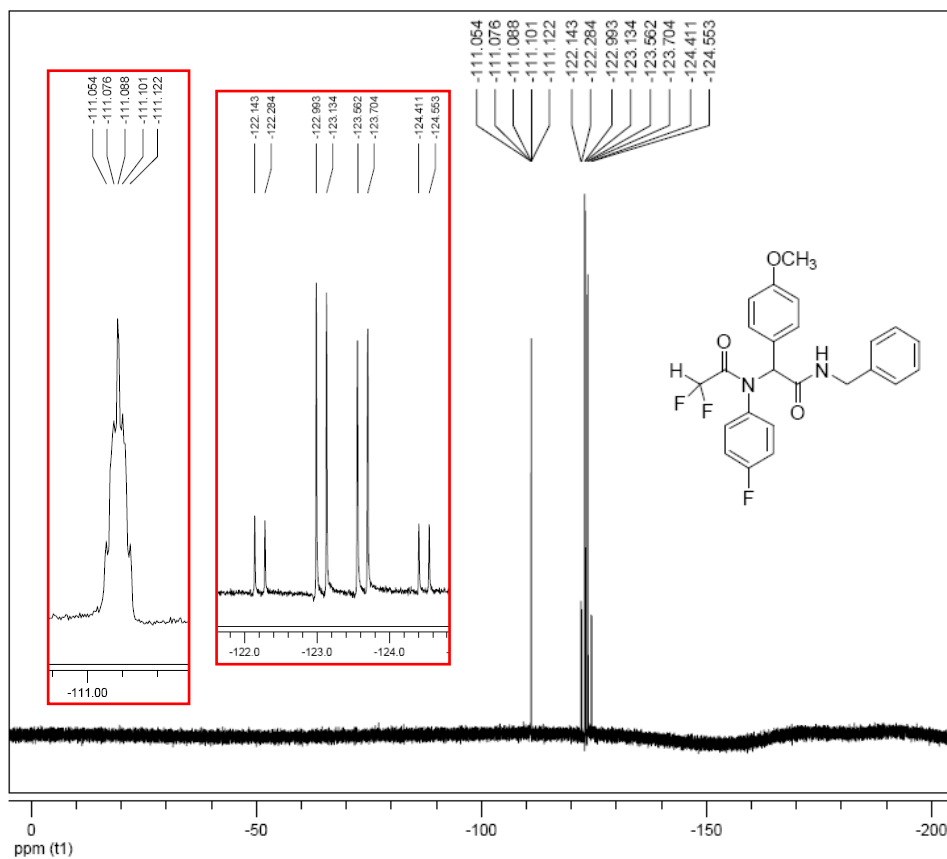

Date:  
28 Sep 2010  
Document's Title:  
LH02-8-F

Spectrum Title:  
None  
Frequency (MHz):  
(f1) 376.498  
Original Points Count:  
(f1) 65536  
Actual Points Count:  
(f1) 65536  
Acquisition Time (sec):  
(f1) 0.7340  
Spectral Width (ppm):  
(f1) 237.148  
Pulse Program:  
Unknown

# MS (ESI) of **4h**

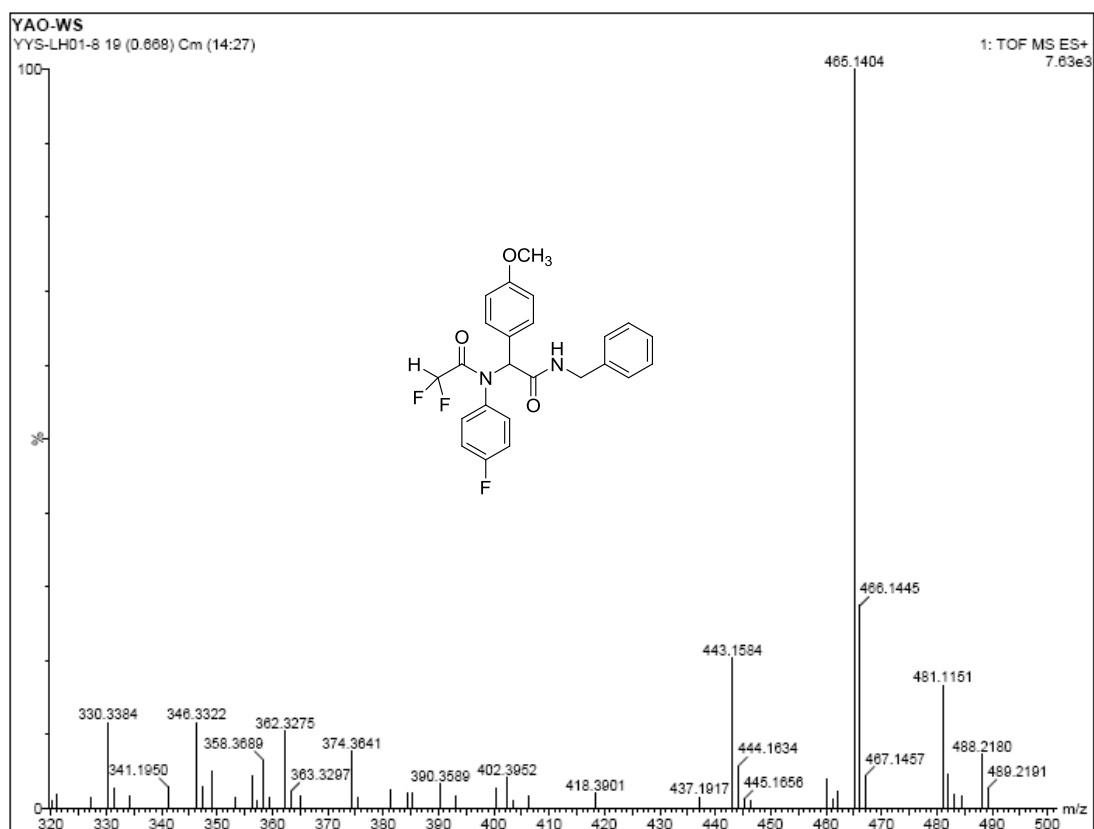

# <sup>1</sup>H NMR of **4i**

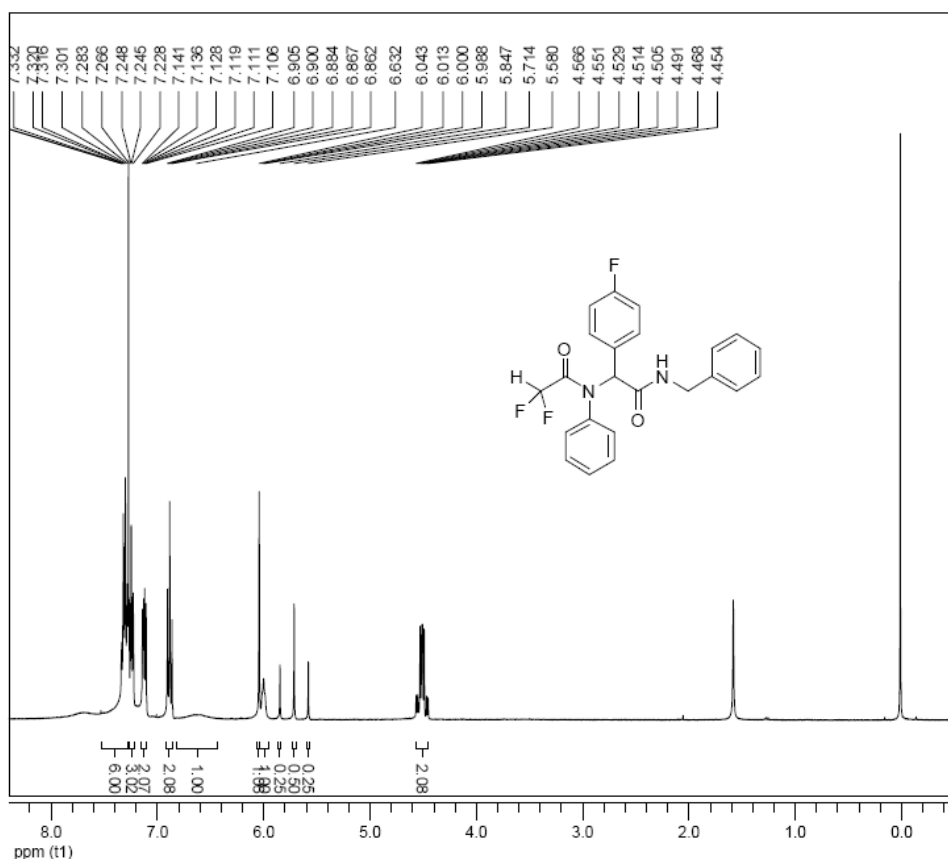

Date:  
9 Dec 2010  
Document's Title:  
LH02-9-H  
Spectrum Title:  
None  
Frequency (MHz):  
(f1) 400.130  
Original Points Count:  
(f1) 32768  
Actual Points Count:  
(f1) 32768  
Acquisition Time (sec):  
(f1) 3.9846  
Spectral Width (ppm):  
(f1) 20.553  
Pulse Program:  
Unknown

# <sup>13</sup>C NMR of **4i**

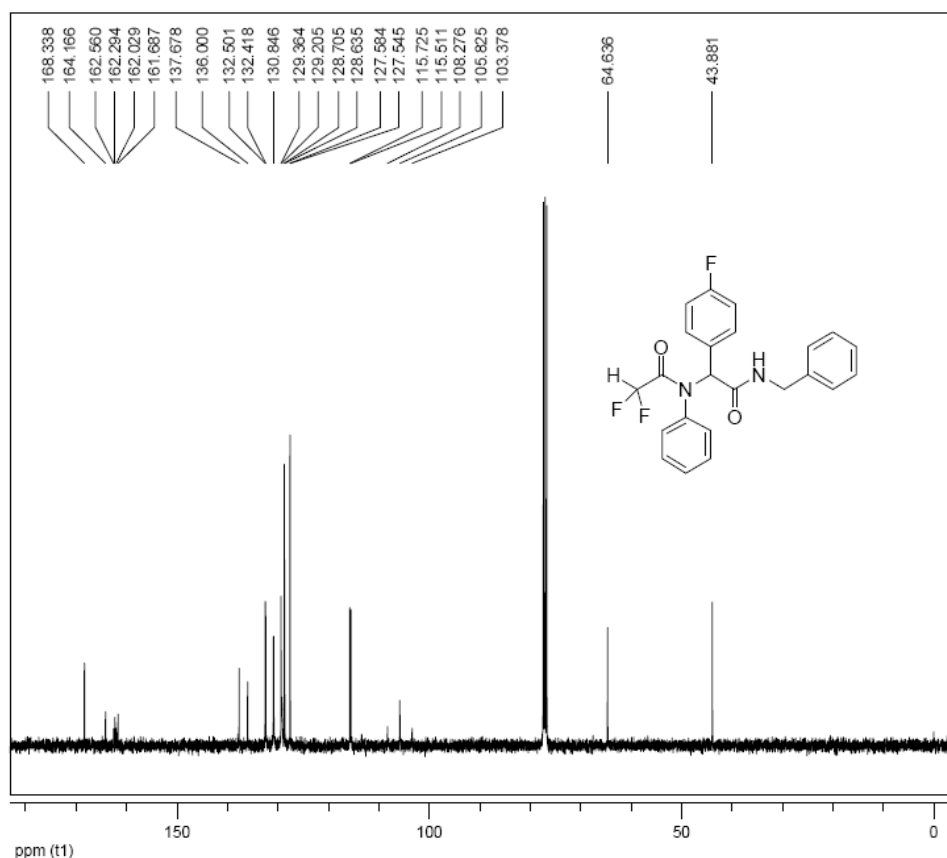

Date:  
29 Sep 2010  
Document's Title:  
LH02-9-C

Spectrum Title:  
None  
Frequency (MHz):  
(f1) 100.613  
Original Points Count:  
(f1) 32768  
Actual Points Count:  
(f1) 32768  
Acquisition Time (sec):  
(f1) 1.3631  
Spectral Width (ppm):  
(f1) 236.921  
Pulse Program:  
Unknown

# <sup>19</sup>F NMR of **4i**

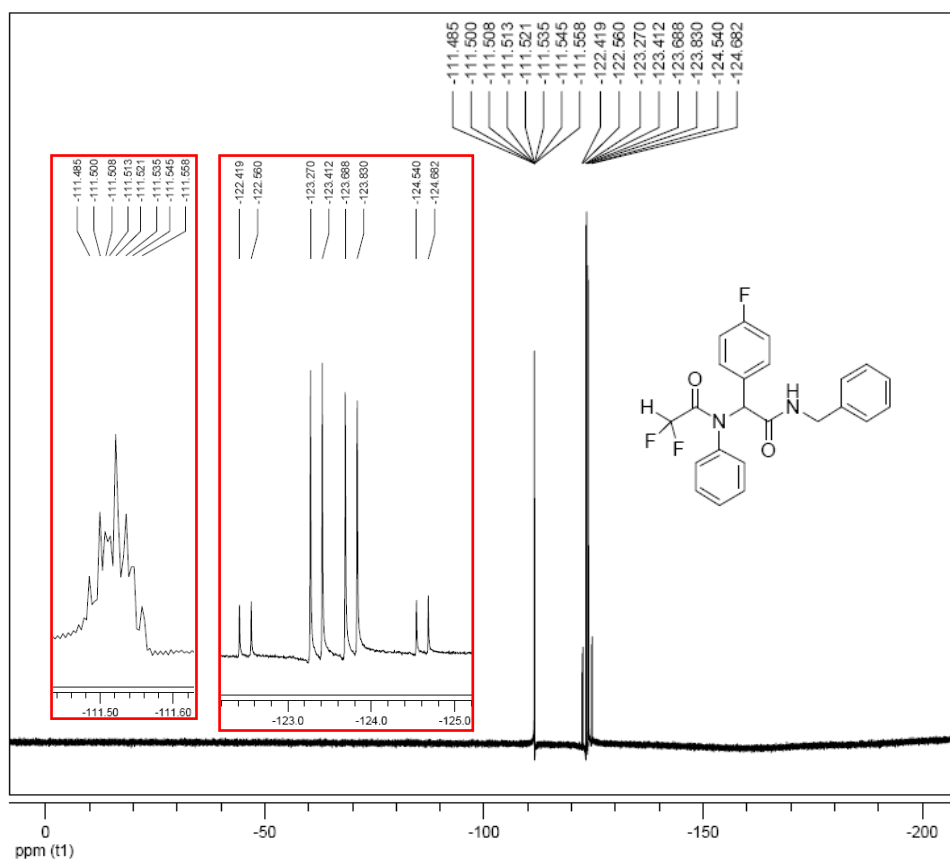

Date:  
24 Dec 2010  
Document's Title:  
LH02-9-F

Spectrum Title:  
None  
Frequency (MHz):  
(f1) 376.498  
Original Points Count:  
(f1) 65536  
Actual Points Count:  
(f1) 65536  
Acquisition Time (sec):  
(f1) 0.7340  
Spectral Width (ppm):  
(f1) 237.148  
Pulse Program:  
Unknown

# MS (ESI) of **4i**

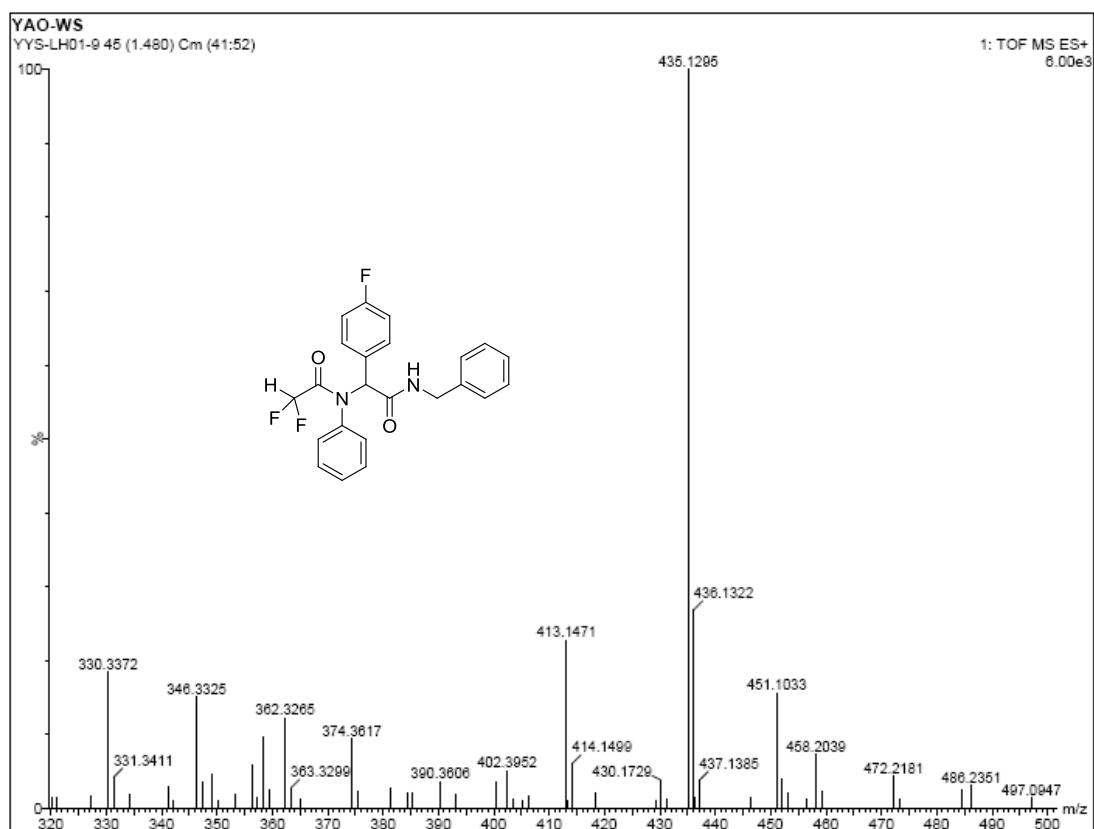

# <sup>1</sup>H NMR of **4j**

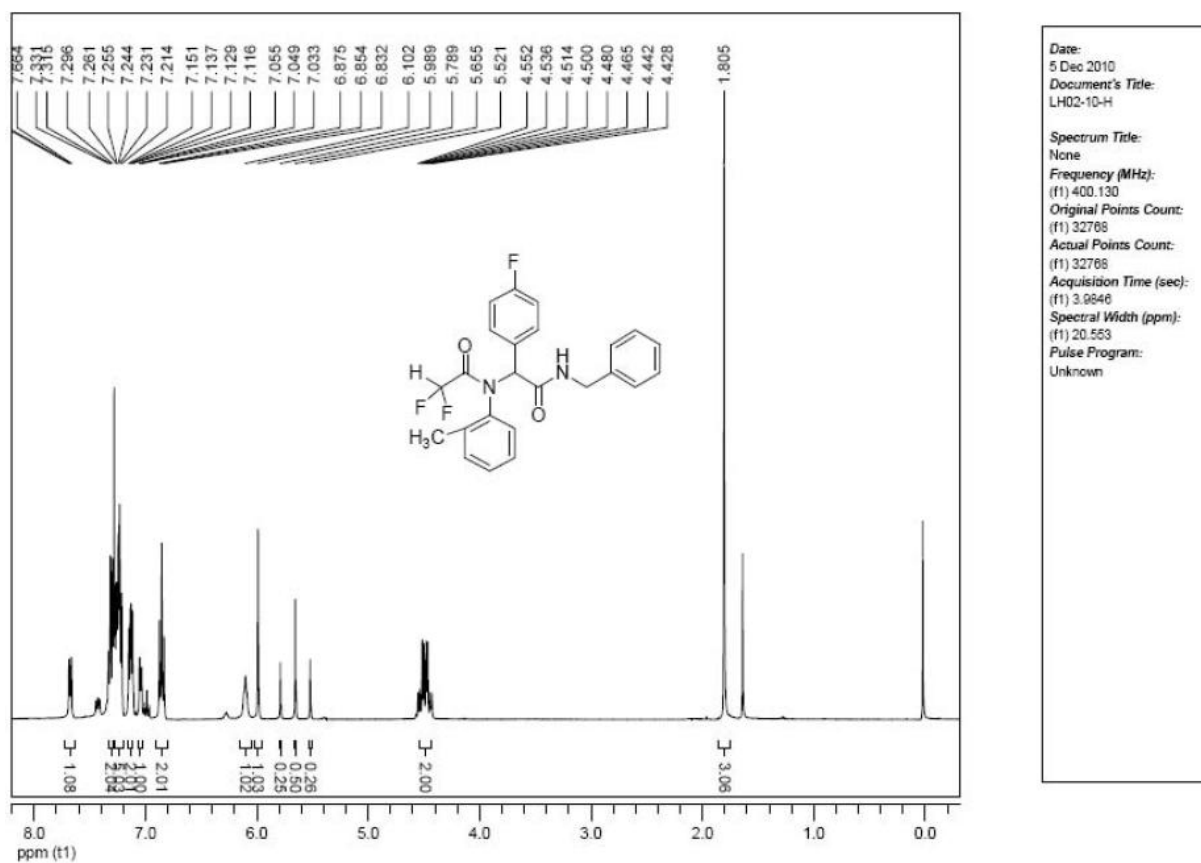

# <sup>13</sup>C NMR of 4j

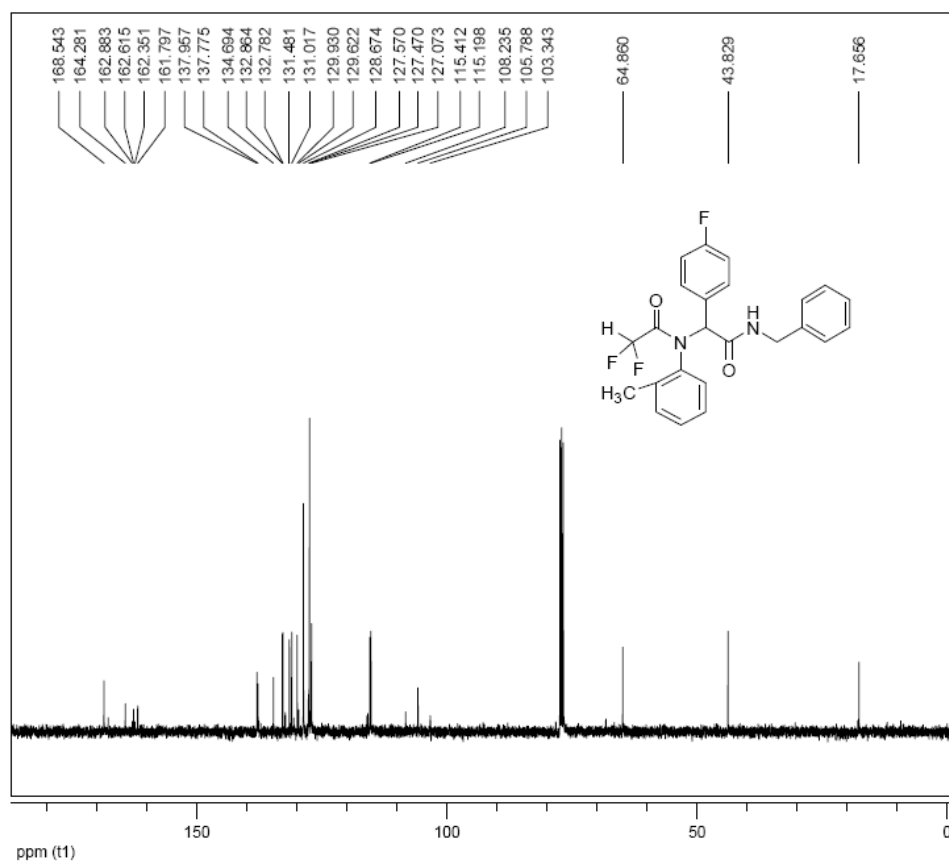

Date:  
9 Dec 2010  
Document's Title:  
LH02-10-C

Spectrum Title:  
None  
Frequency (MHz):  
(f1) 100.613  
Original Points Count:  
(f1) 32768  
Actual Points Count:  
(f1) 32768  
Acquisition Time (sec):  
(f1) 1.3631  
Spectral Width (ppm):  
(f1) 238.921  
Pulse Program:  
Unknown

# <sup>19</sup>F NMR of 4j

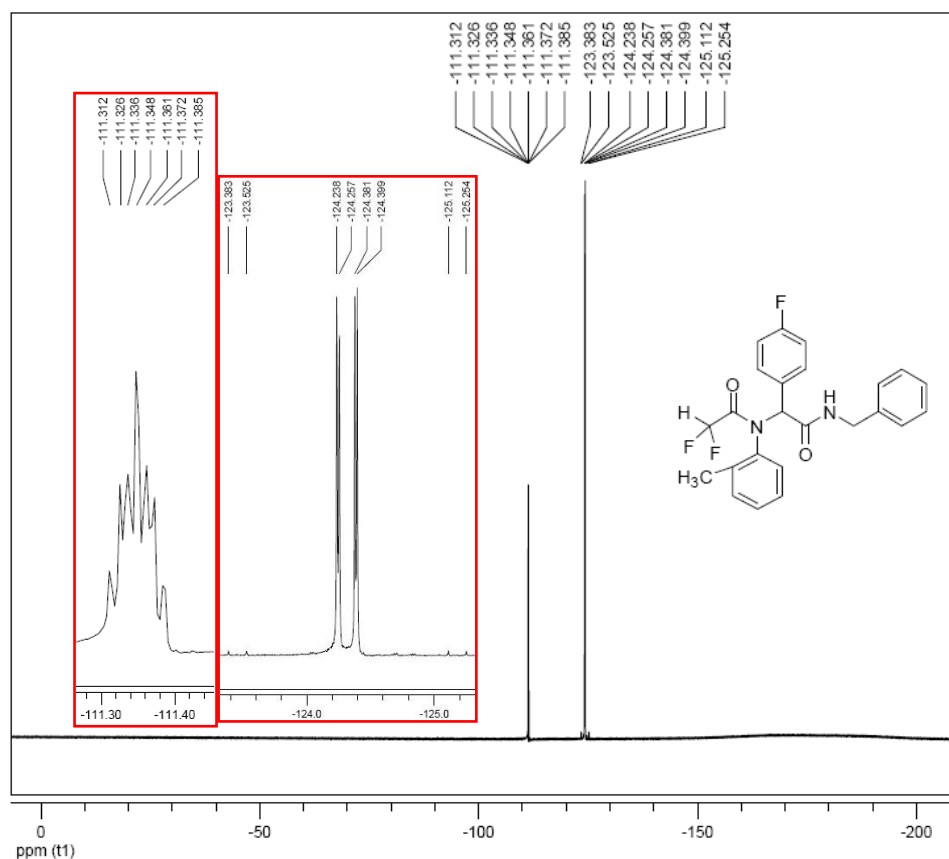

Date:  
9 Dec 2010  
Document's Title:  
LH02-10-F

Spectrum Title:  
None  
Frequency (MHz):  
(f1) 376.498  
Original Points Count:  
(f1) 65536  
Actual Points Count:  
(f1) 65536  
Acquisition Time (sec):  
(f1) 0.7340  
Spectral Width (ppm):  
(f1) 237.148  
Pulse Program:  
Unknown

# MS (ESI) of **4j**

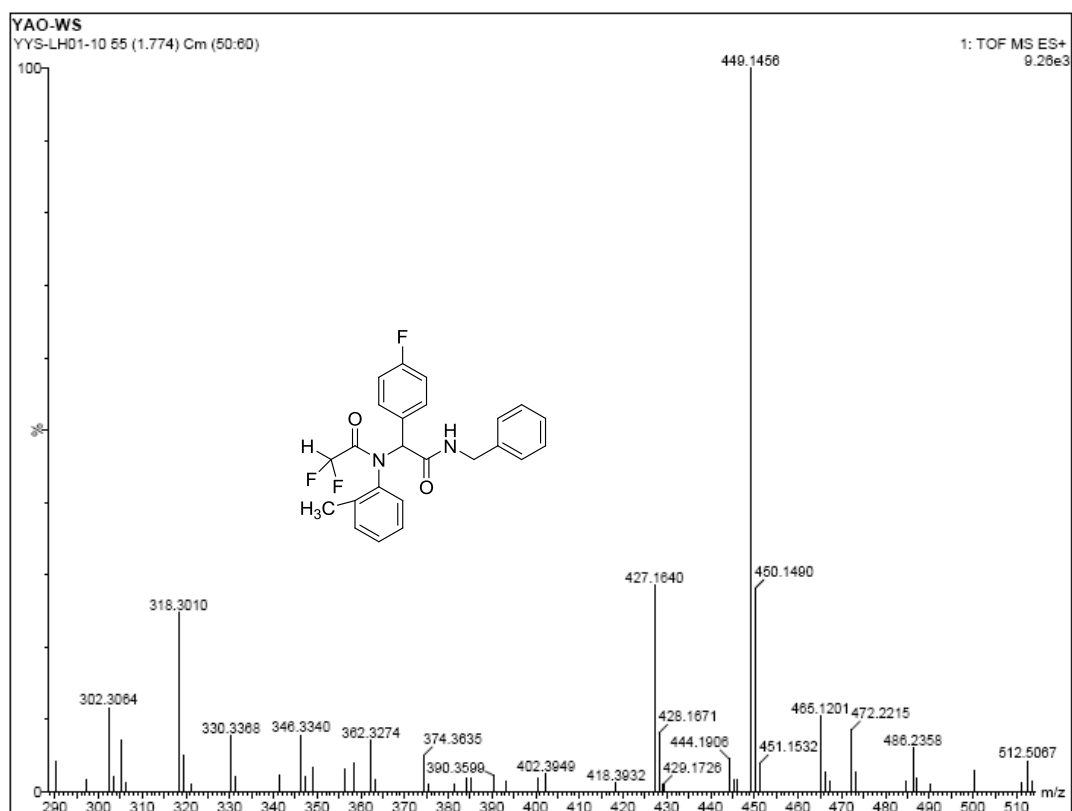

# <sup>1</sup>H NMR of **4k**

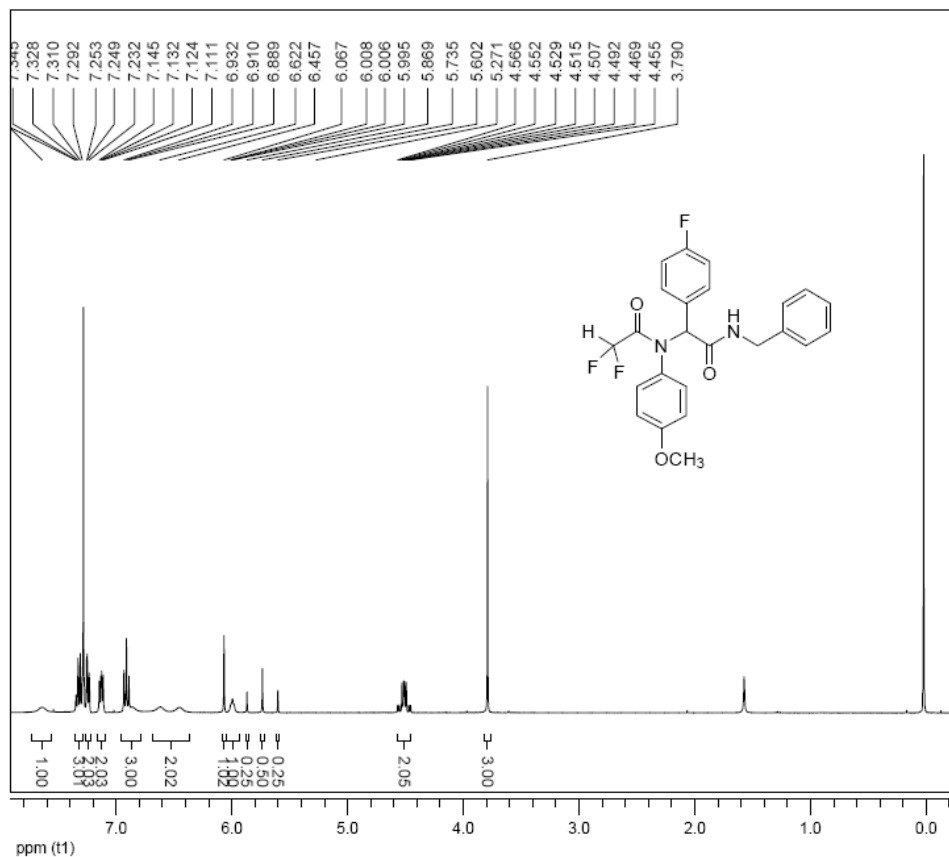

Date:  
9 Dec 2010  
Document's Title:  
LH02-11-H  
  
Spectrum Title:  
None  
Frequency (MHz):  
(f1) 400.130  
Original Points Count:  
(f1) 32768  
Actual Points Count:  
(f1) 32768  
Acquisition Time (sec):  
(f1) 3.9846  
Spectral Width (ppm):  
(f1) 20.553  
Pulse Program:  
Unknown

### <sup>13</sup>C NMR of **4k**

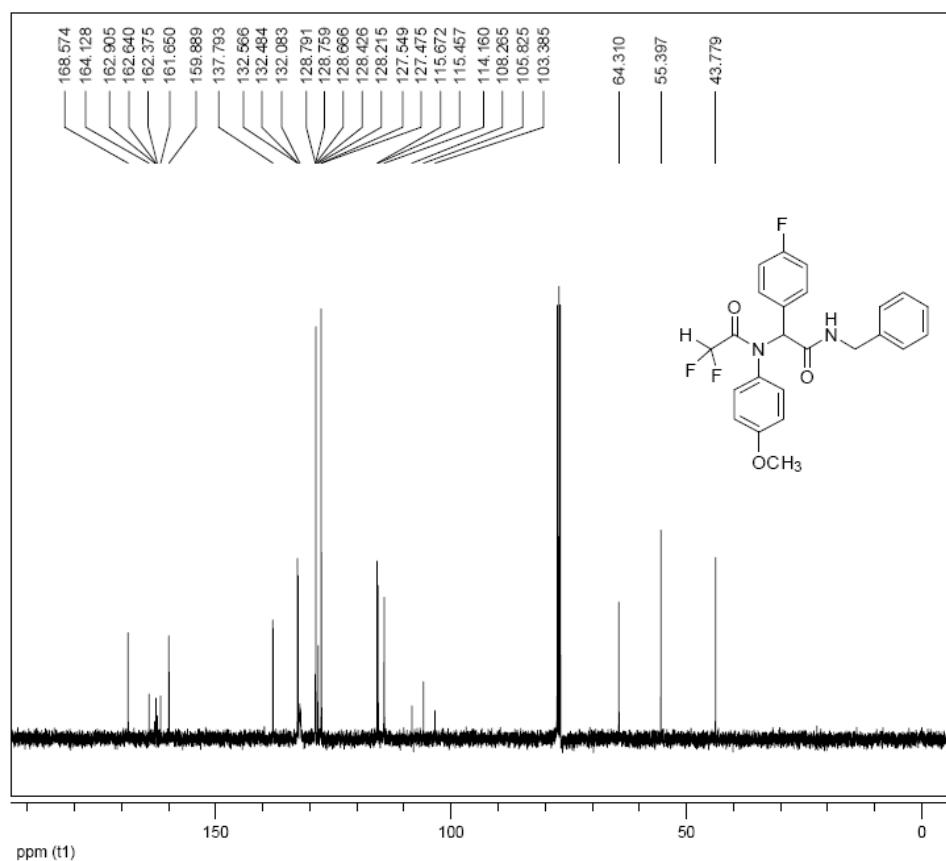

Date:  
9 Dec 2010  
Document's Title:  
LH02-11-C

Spectrum Title:  
None  
Frequency (MHz):  
(f1) 100.613  
Original Points Count:  
(f1) 32768  
Actual Points Count:  
(f1) 32768  
Acquisition Time (sec):  
(f1) 1.3631  
Spectral Width (ppm):  
(f1) 236.921  
Pulse Program:  
Unknown

### <sup>19</sup>F NMR of **4k**

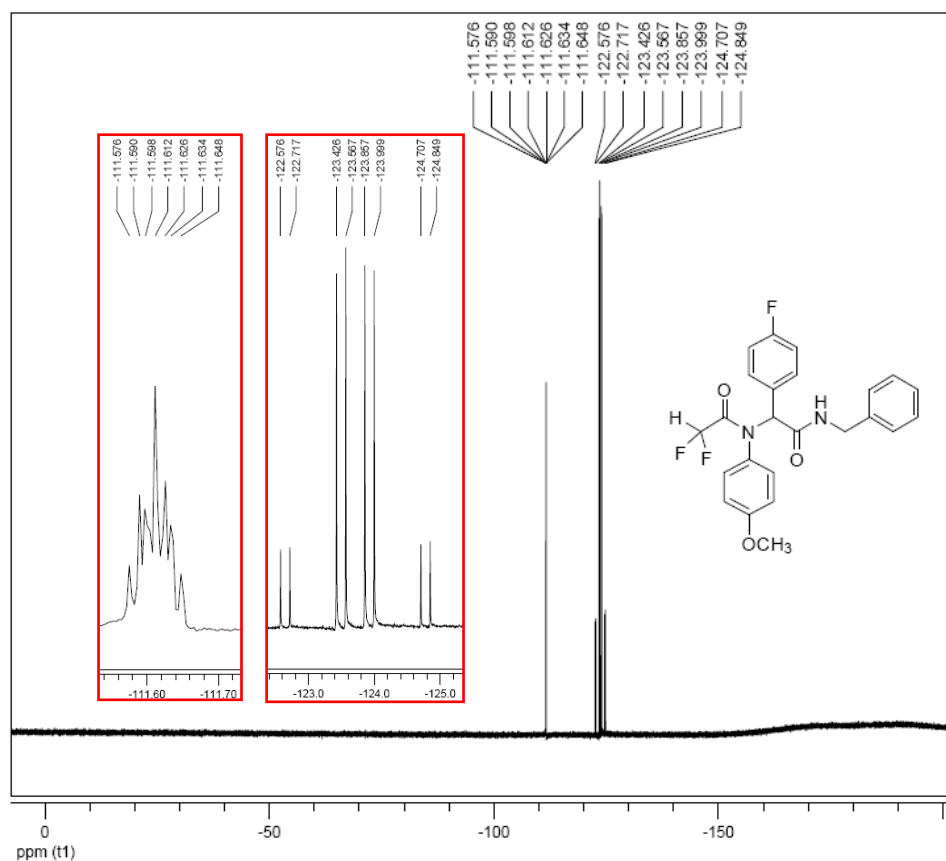

Date:  
9 Dec 2010  
Document's Title:  
LH02-11-F

Spectrum Title:  
None  
Frequency (MHz):  
(f1) 376.498  
Original Points Count:  
(f1) 65536  
Actual Points Count:  
(f1) 65536  
Acquisition Time (sec):  
(f1) 0.7340  
Spectral Width (ppm):  
(f1) 237.148  
Pulse Program:  
Unknown

<sup>1</sup>H NMR of **4l**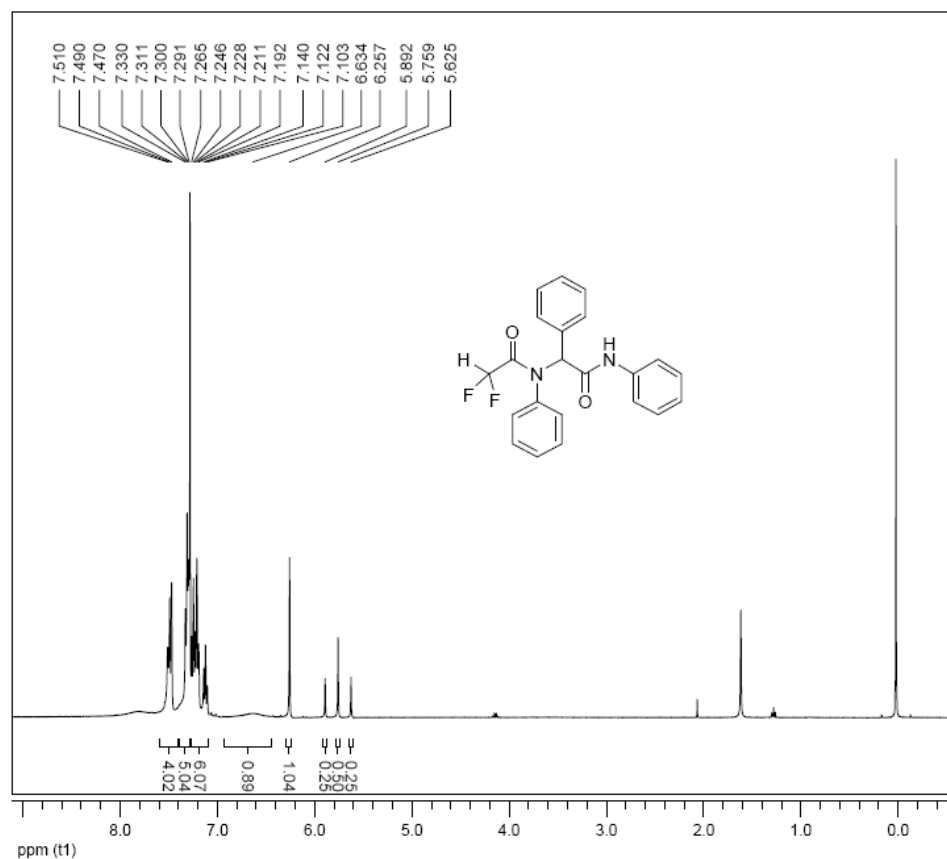

S50

<sup>13</sup>C NMR of **4l**

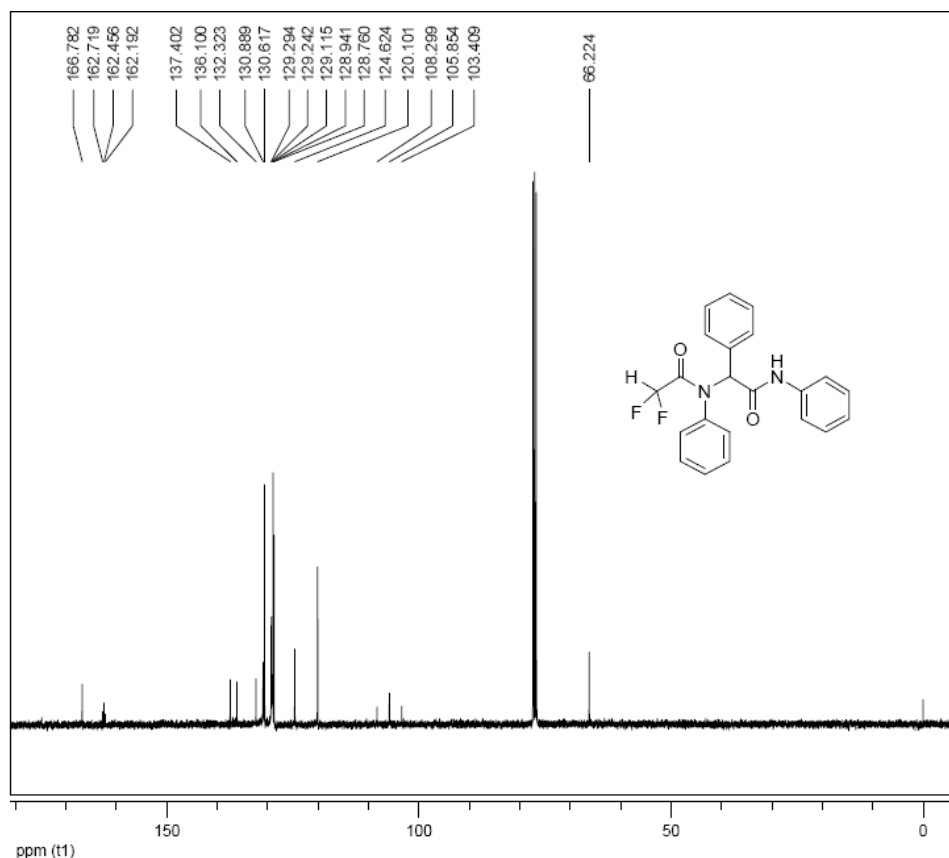

Date:  
9 Dec 2010  
Document's Title:  
LH01-12-C

Spectrum Title:  
None  
Frequency (MHz):  
(f1) 100.613  
Original Points Count:  
(f1) 32768  
Actual Points Count:  
(f1) 32768  
Acquisition Time (sec):  
(f1) 1.3631  
Spectral Width (ppm):  
(f1) 238.921  
Pulse Program:  
Unknown

<sup>19</sup>F NMR of **4l**

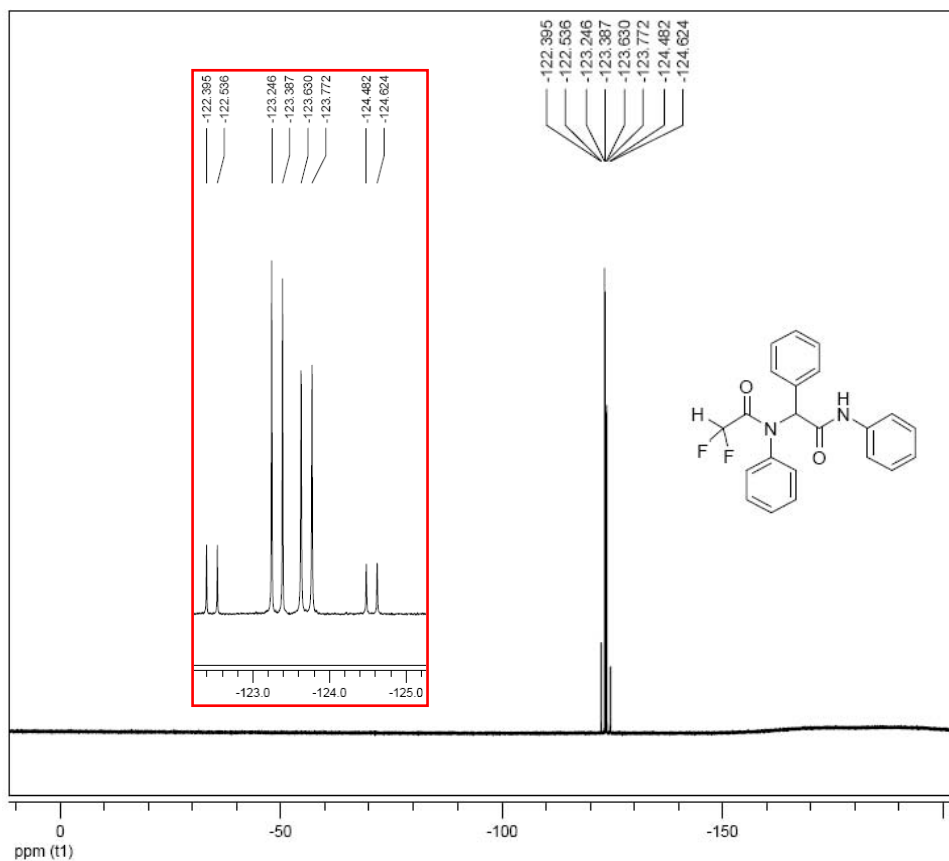

Date:  
9 Dec 2010  
Document's Title:  
LH02-12-F

Spectrum Title:  
None  
Frequency (MHz):  
(f1) 376.498  
Original Points Count:  
(f1) 65536  
Actual Points Count:  
(f1) 65536  
Acquisition Time (sec):  
(f1) 0.7340  
Spectral Width (ppm):  
(f1) 237.148  
Pulse Program:  
Unknown

# MS (ESI) of **4l**

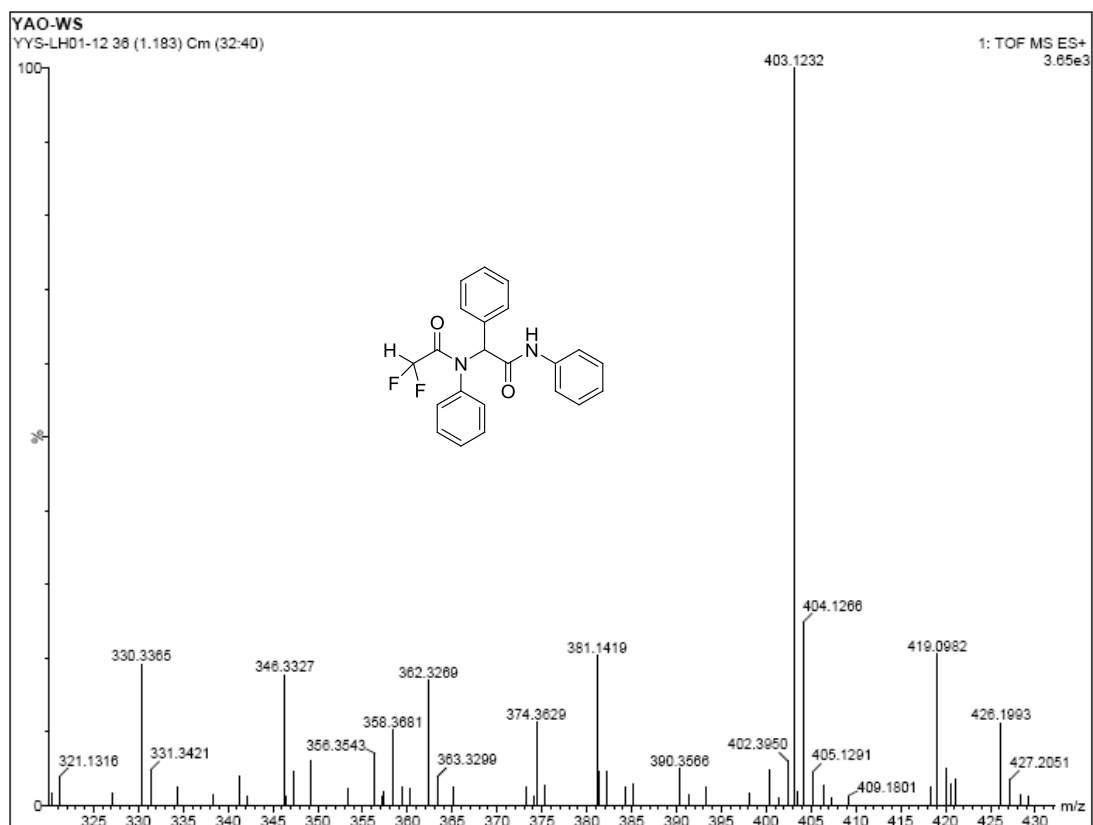

# <sup>1</sup>H NMR of **4m**

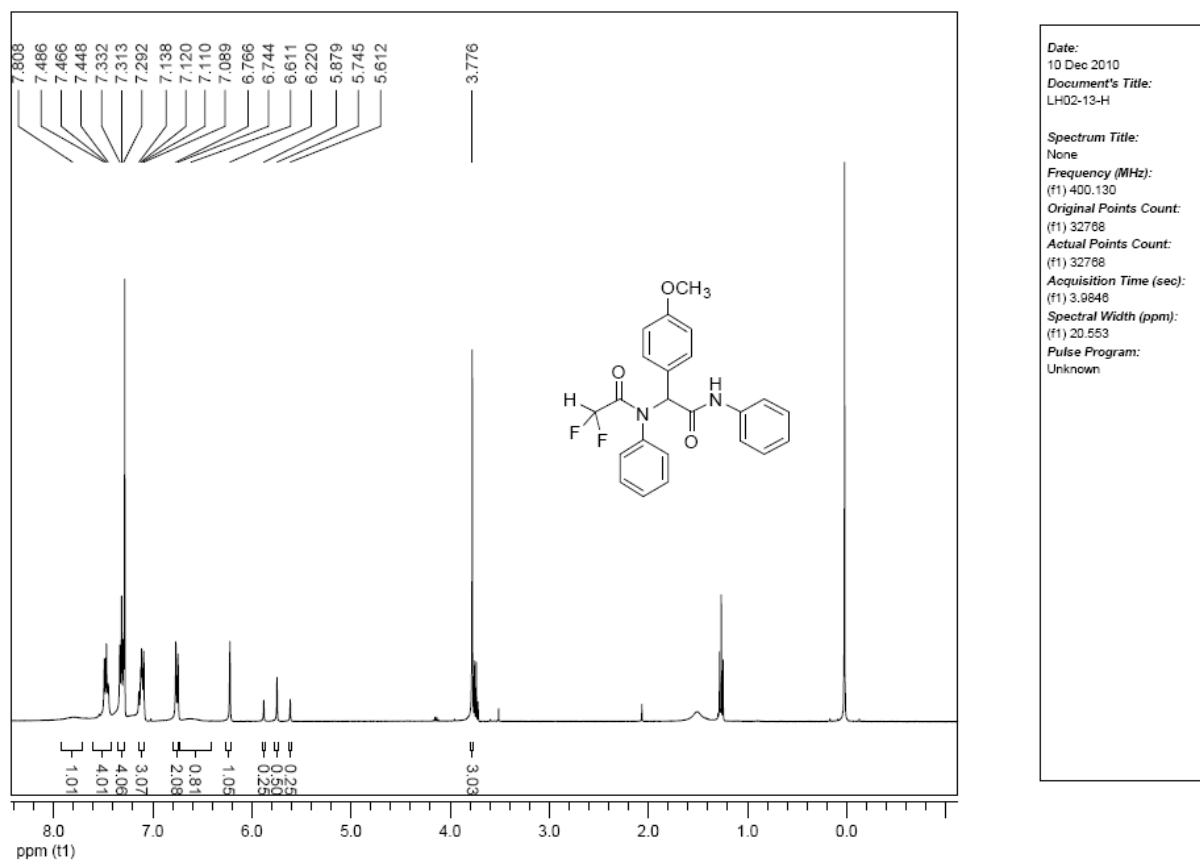

### <sup>13</sup>C NMR of **4m**

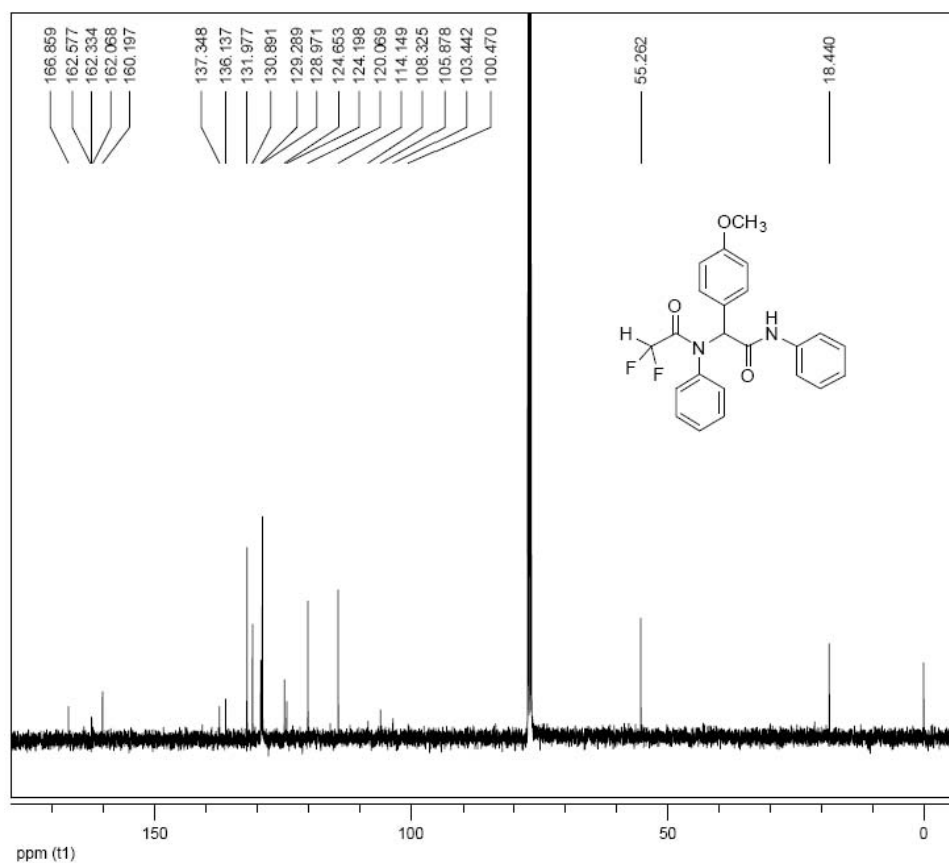

Date:  
10 Dec 2010  
Document's Title:  
LH02-13-C

Spectrum Title:  
None  
Frequency (MHz):  
(f1) 100.613  
Original Points Count:  
(f1) 32768  
Actual Points Count:  
(f1) 32768  
Acquisition Time (sec):  
(f1) 1.3631  
Spectral Width (ppm):  
(f1) 238.921  
Pulse Program:  
Unknown

### <sup>19</sup>F NMR of **4m**

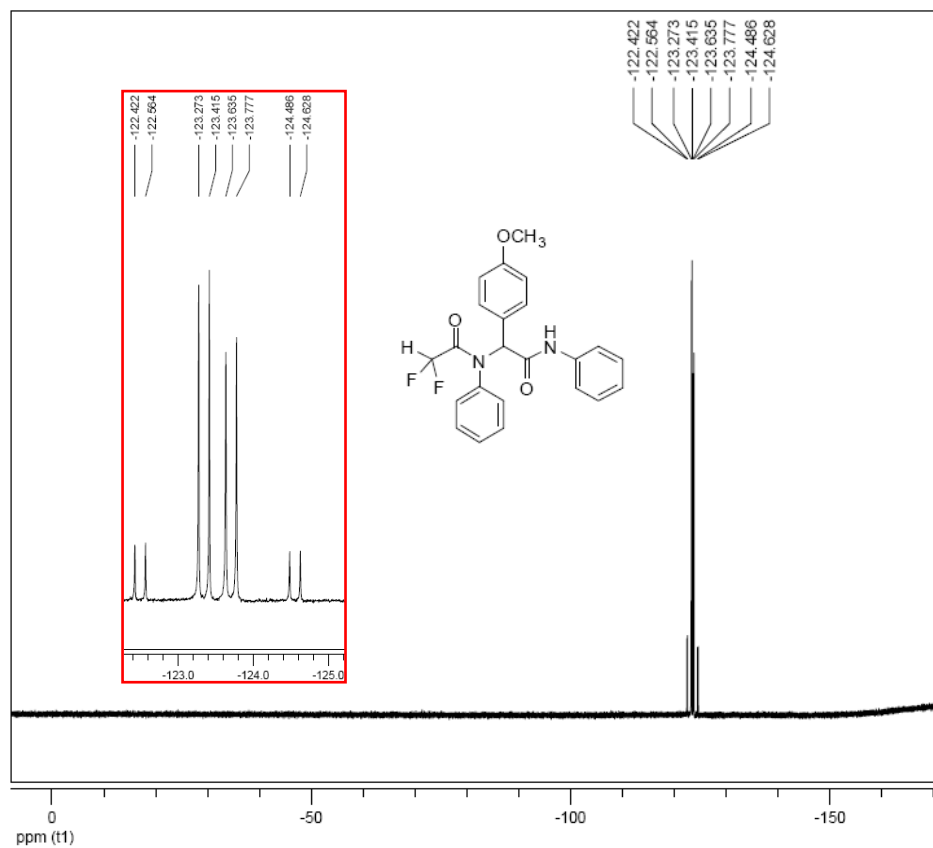

Date:  
10 Dec 2010  
Document's Title:  
LH02-13-F

Spectrum Title:  
None  
Frequency (MHz):  
(f1) 376.498  
Original Points Count:  
(f1) 65536  
Actual Points Count:  
(f1) 65536  
Acquisition Time (sec):  
(f1) 0.7340  
Spectral Width (ppm):  
(f1) 237.148  
Pulse Program:  
Unknown

# MS (ESI) of **4m**

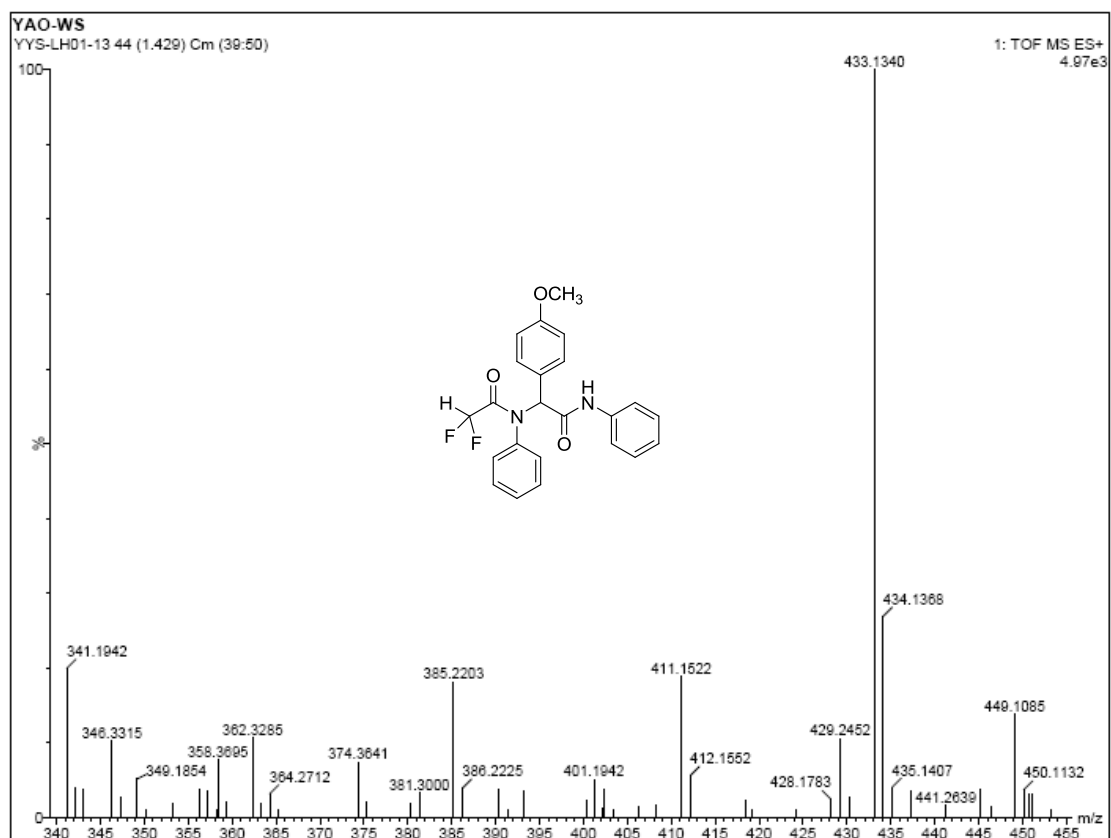

# <sup>1</sup>H NMR of **5**

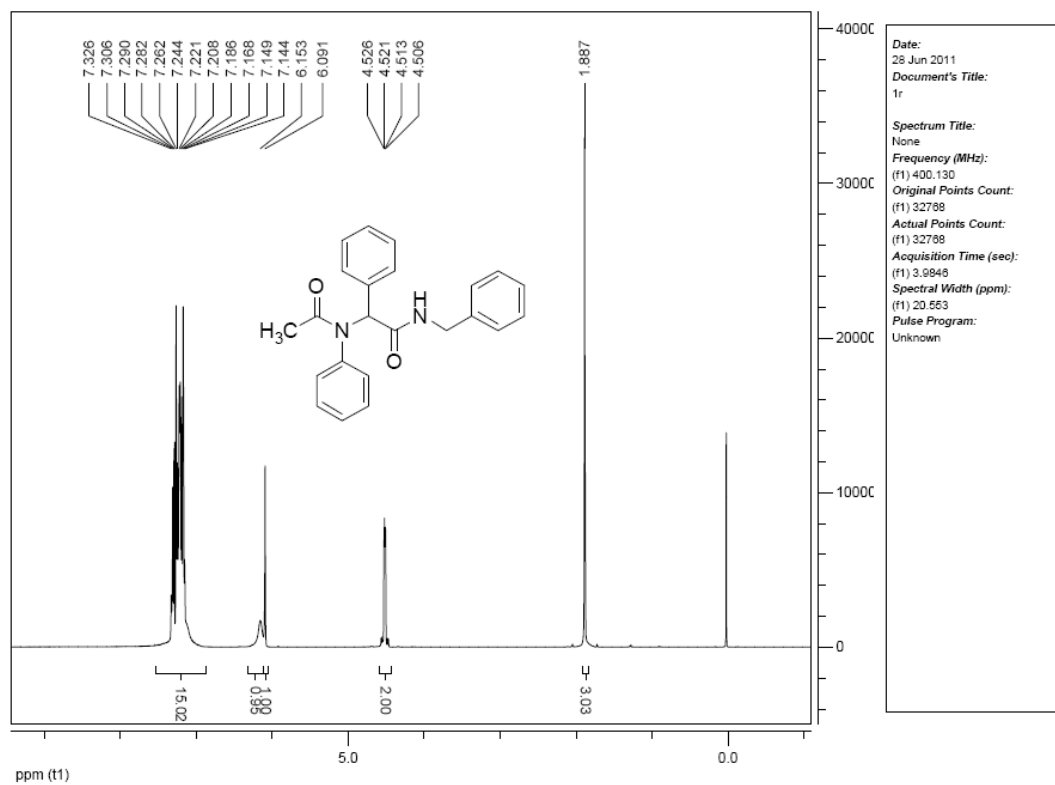

<sup>13</sup>C NMR of **5**

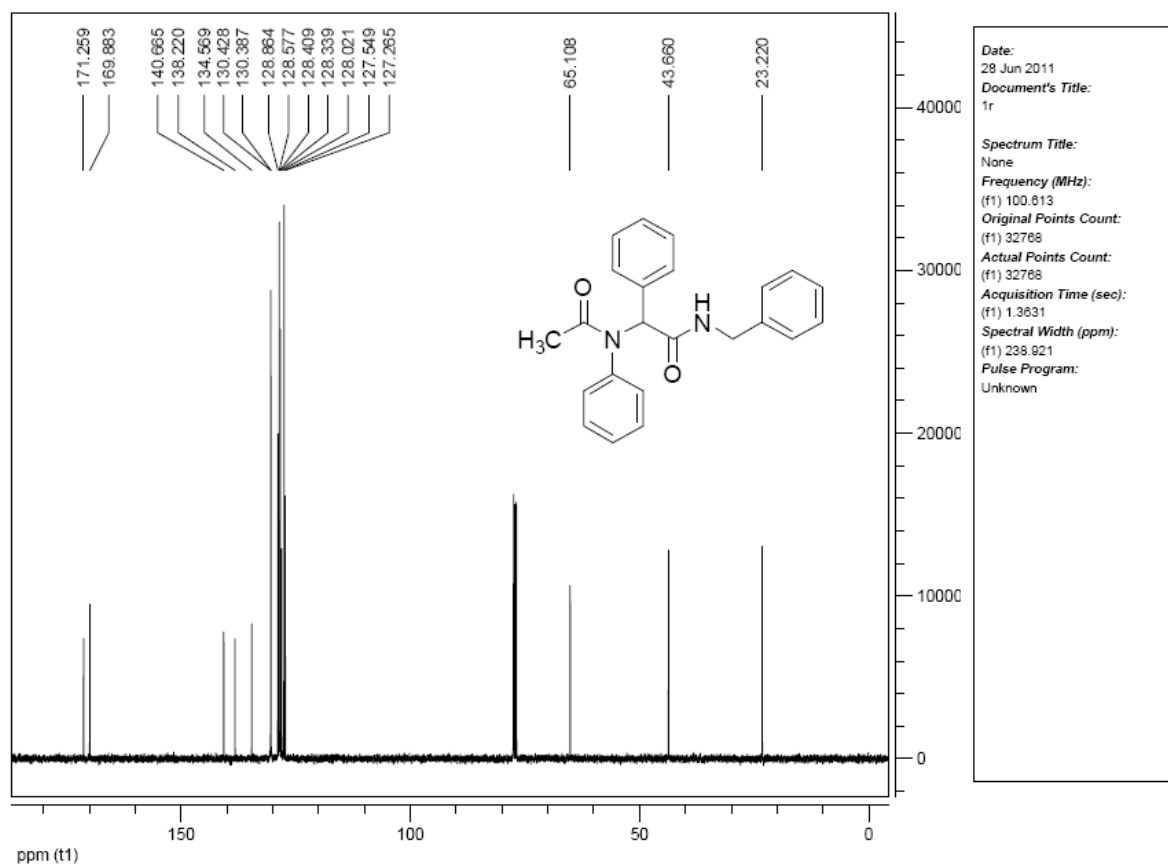

<sup>1</sup>H NMR of **6**

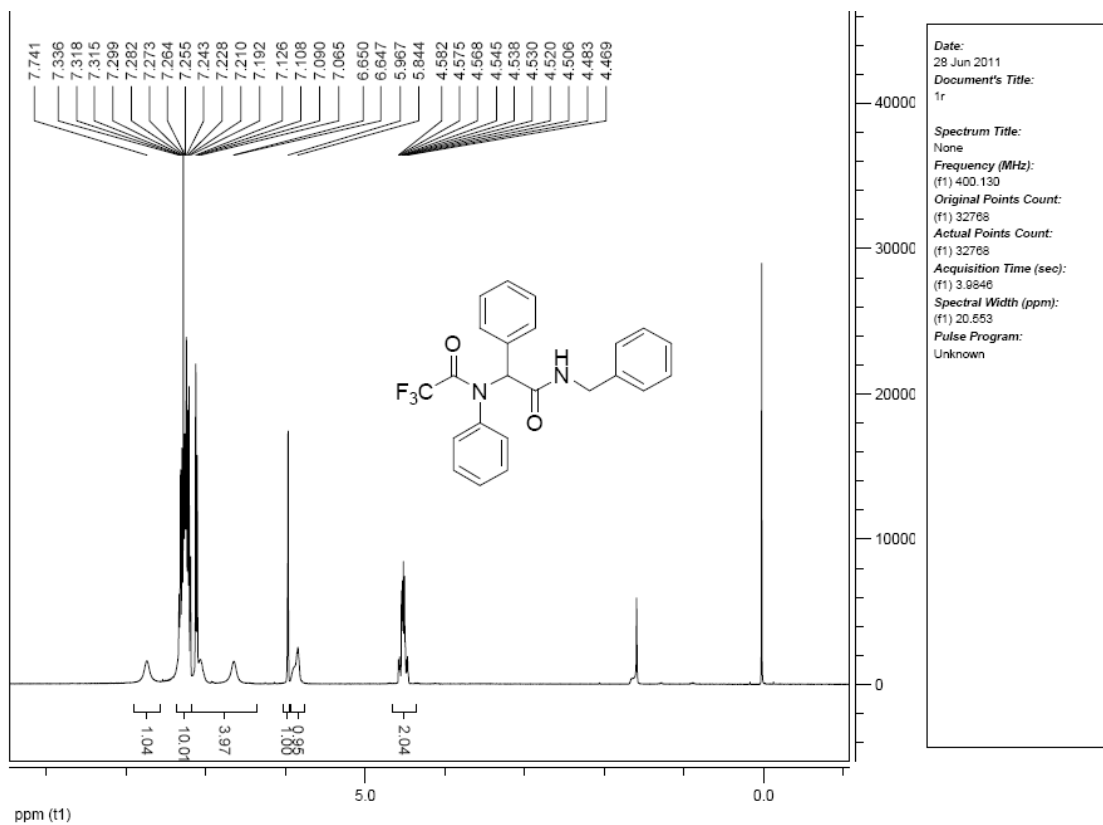

<sup>13</sup>C NMR of **6**

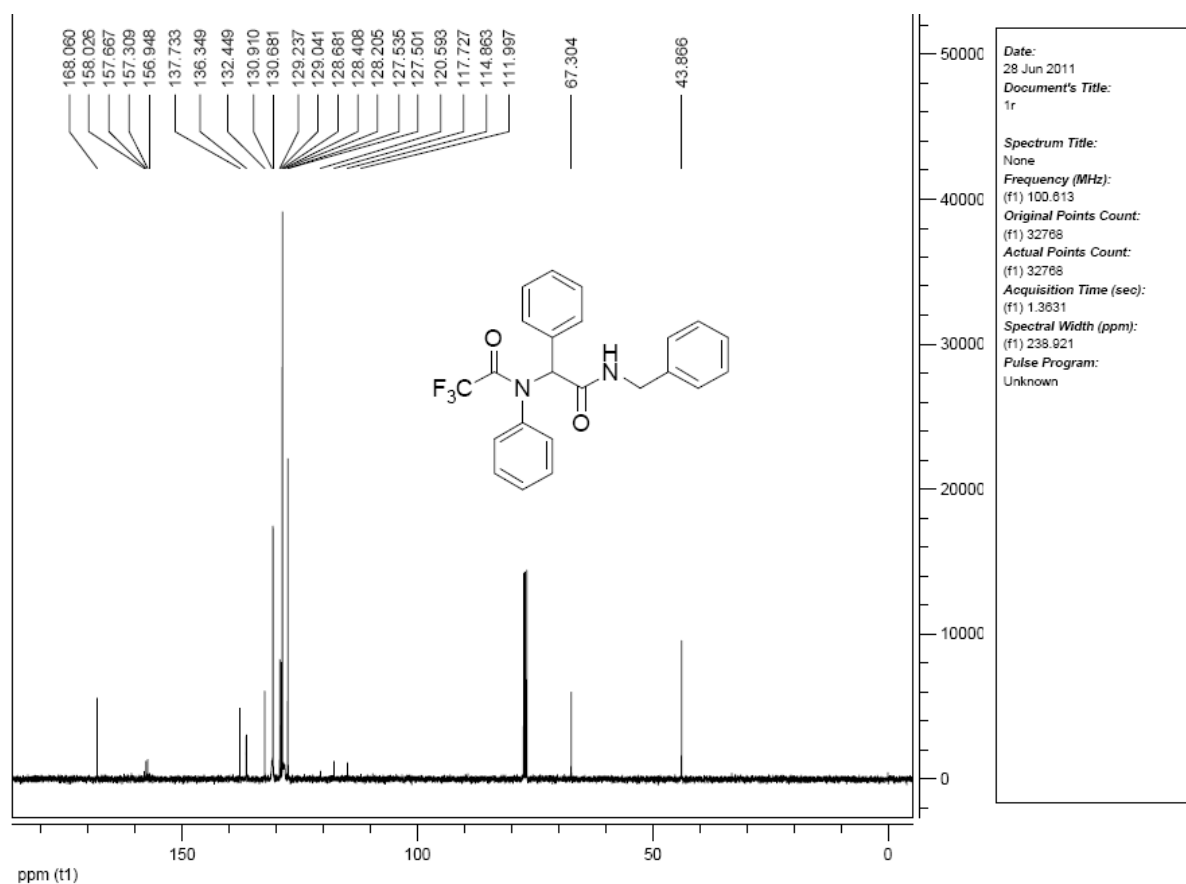

<sup>19</sup>F NMR of **6**

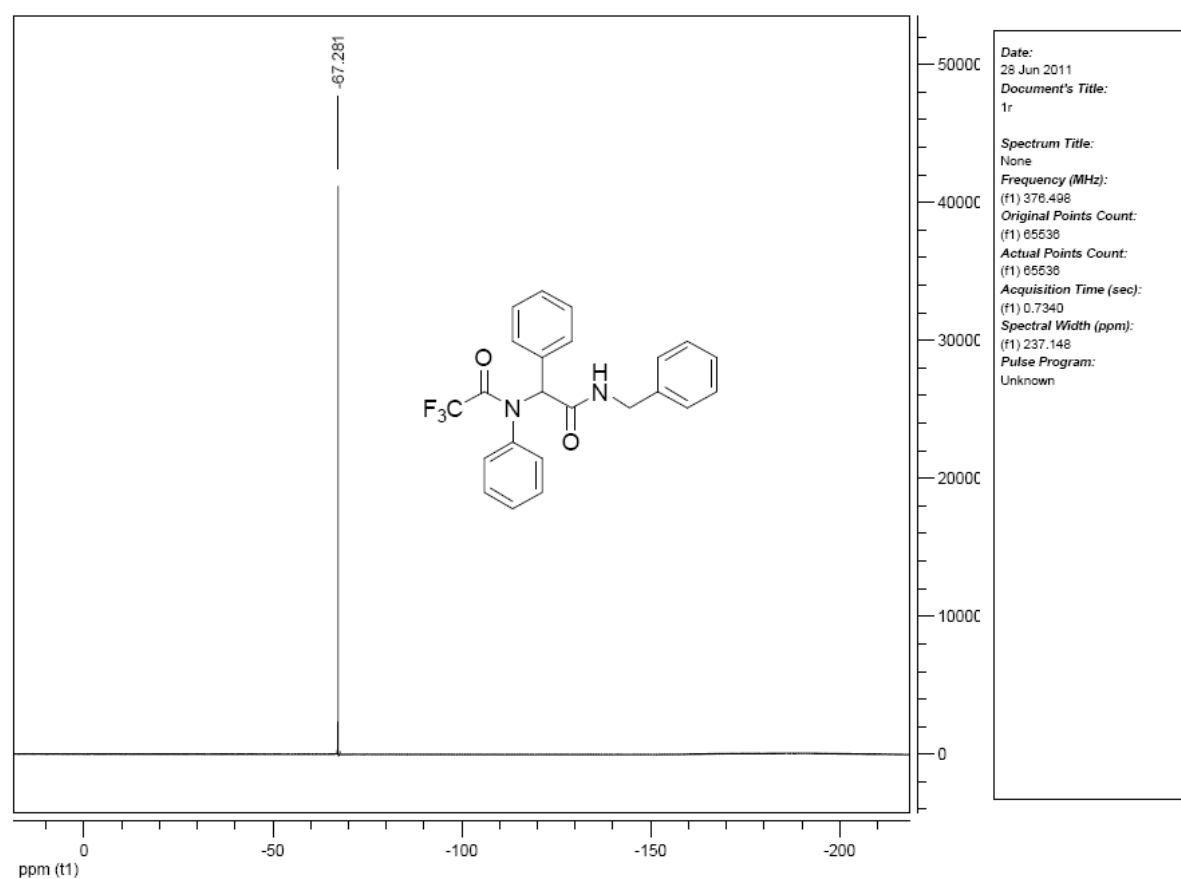

Supplement: Additional file 1 [file 1860-5397-7-123-S1.pdf]
